# Supplementary material for: Forecasting disability-adjusted life years for chronic diseases: reference and alternative scenarios of salt intake for 2017–2040 in Japan
Source: Springer Nature journal article supplement (doi:10.1186/s12889-020-09596-3), 2020-09-29
Supplement: MOESM1 [file 18429612]

1 **Supplementary Figure 1: Observed and predicted DALY rate (per 100,000 population) in the 20–49 age**  
2 **group for cardiovascular diseases for reference forecast and three alternative scenarios, 1990–2040: (A)**  
3 **men, (B) women, and (C) both sexes combined**

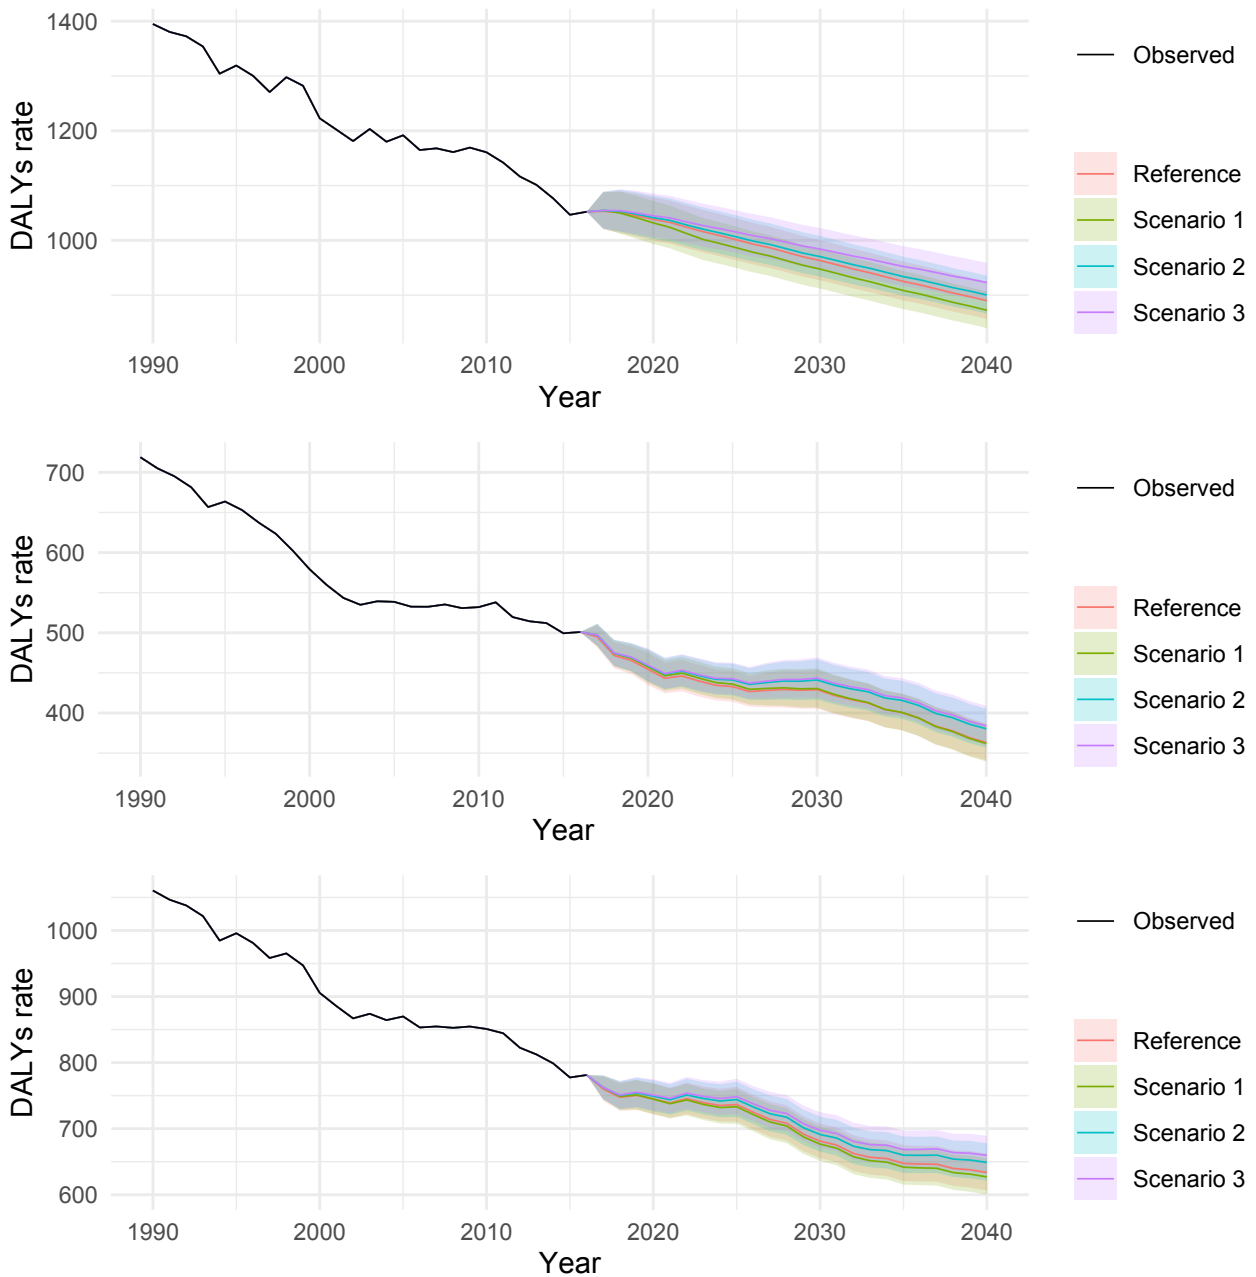

4  
5 1: best scenario; 2: moderate scenario; 3: worse scenario. It is important to note that the y-axis scales are  
6 different for each panel in order to make the differences between scenarios easier to understand.

7 **Supplementary Figure 2: Observed and predicted DALY rate (per 100,000 population) in the 50–69 age**  
 8 **group for cardiovascular diseases for reference forecast and three alternative scenarios, 1990–2040: (A)**  
 9 **men, (B) women, and (C) both sexes combined**

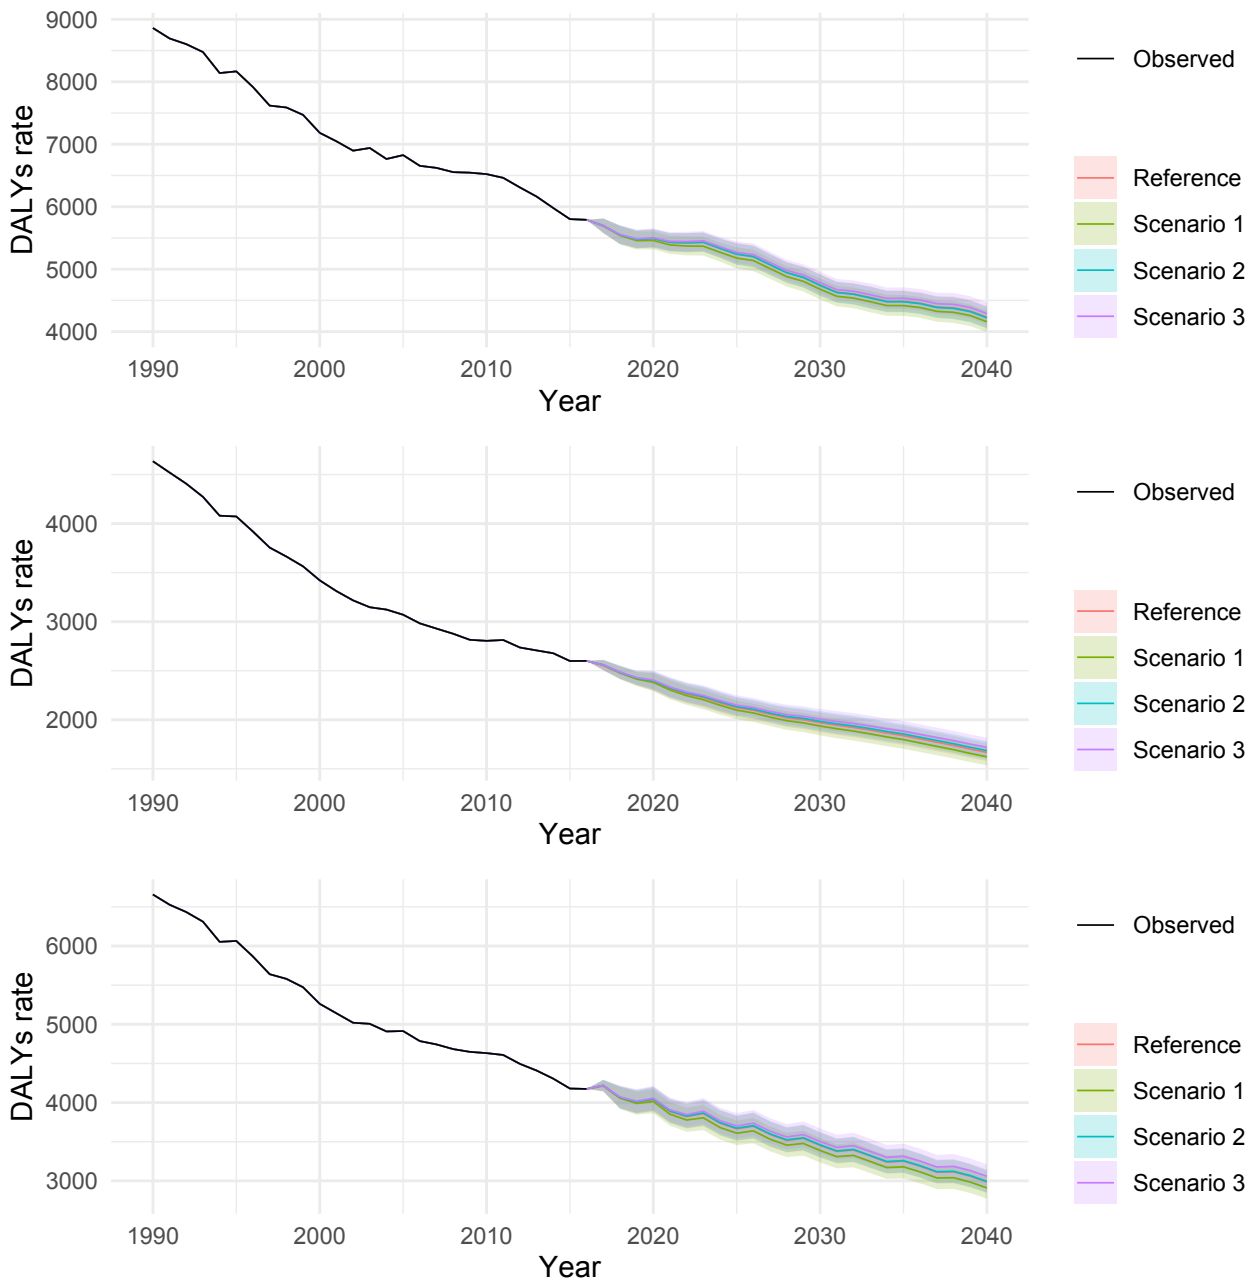

10

11 1: best scenario; 2: moderate scenario; 3: worse scenario. It is important to note that the y-axis scales are

12 different for each panel in order to make the differences between scenarios easier to understand.

13 **Supplementary Figure 3: Observed and predicted DALY rate (per 100,000 population) in the ≥70 age group**  
14 **for cardiovascular diseases for reference forecast and three alternative scenarios, 1990–2040: (A) men, (B)**  
15 **women, and (C) both sexes combined**

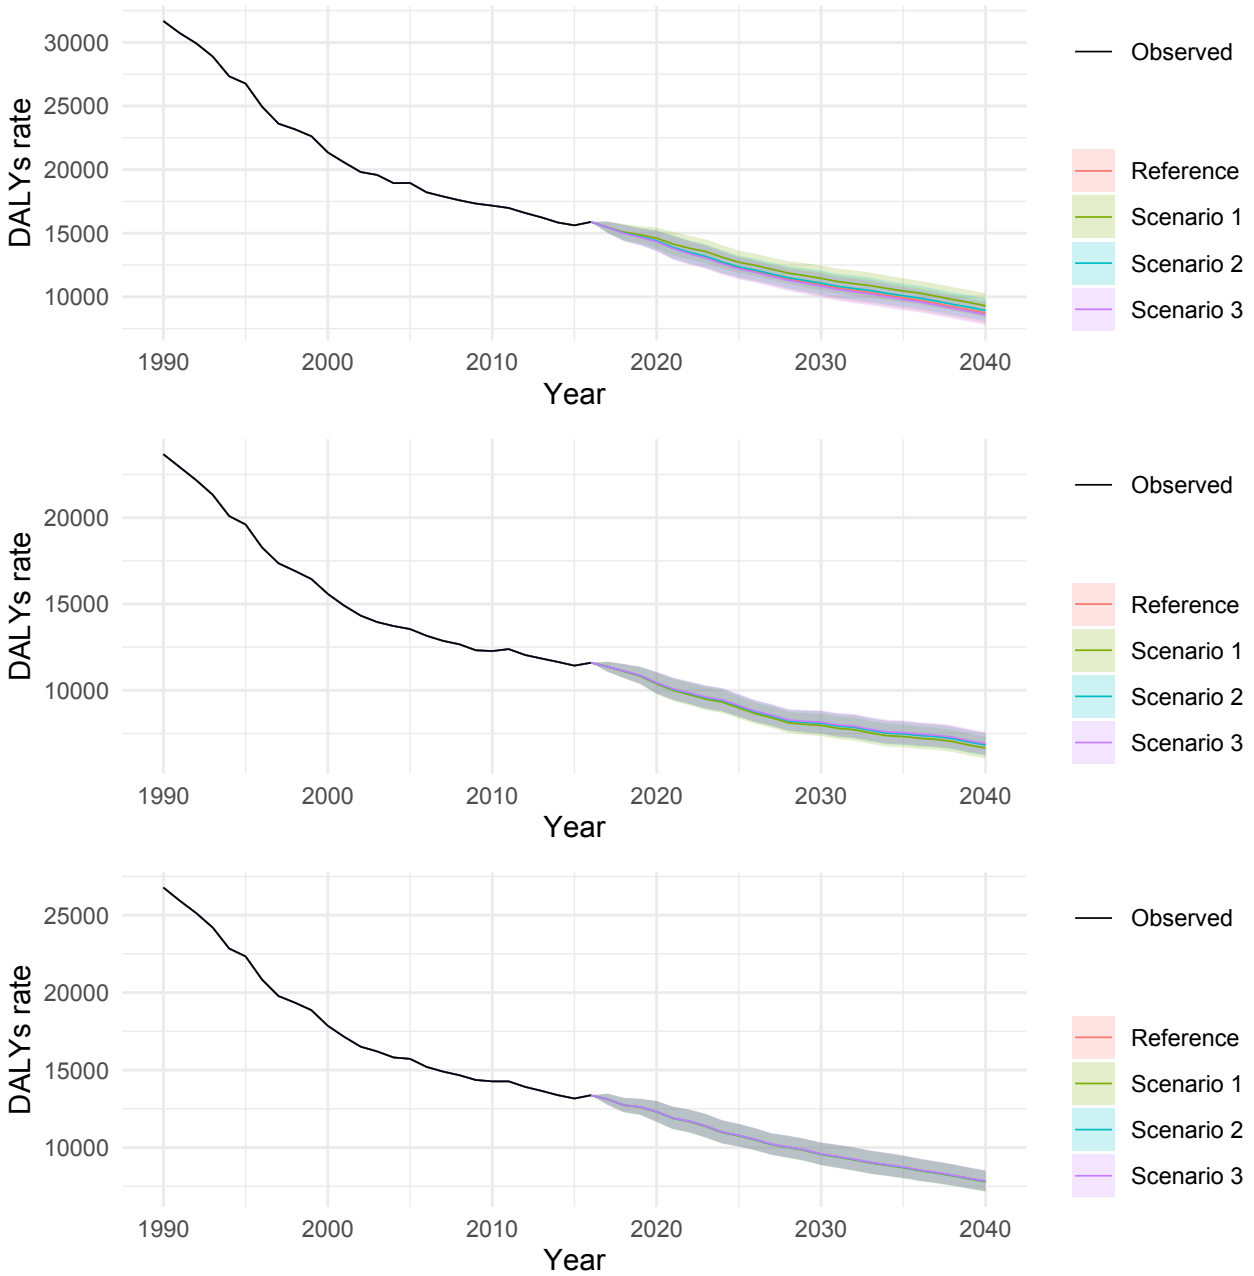

16  
17 1: best scenario; 2: moderate scenario; 3: worse scenario. It is important to note that the y-axis scales are  
18 different for each panel in order to make the differences between scenarios easier to understand.

19 **Supplementary Figure 4: Observed and predicted DALY rate (per 100,000 population) in the 20–49 age**  
 20 **group for chronic kidney diseases for reference forecast and three alternative scenarios, 1990–2040: (A)**  
 21 **men, (B) women, and (C) both sexes combined**

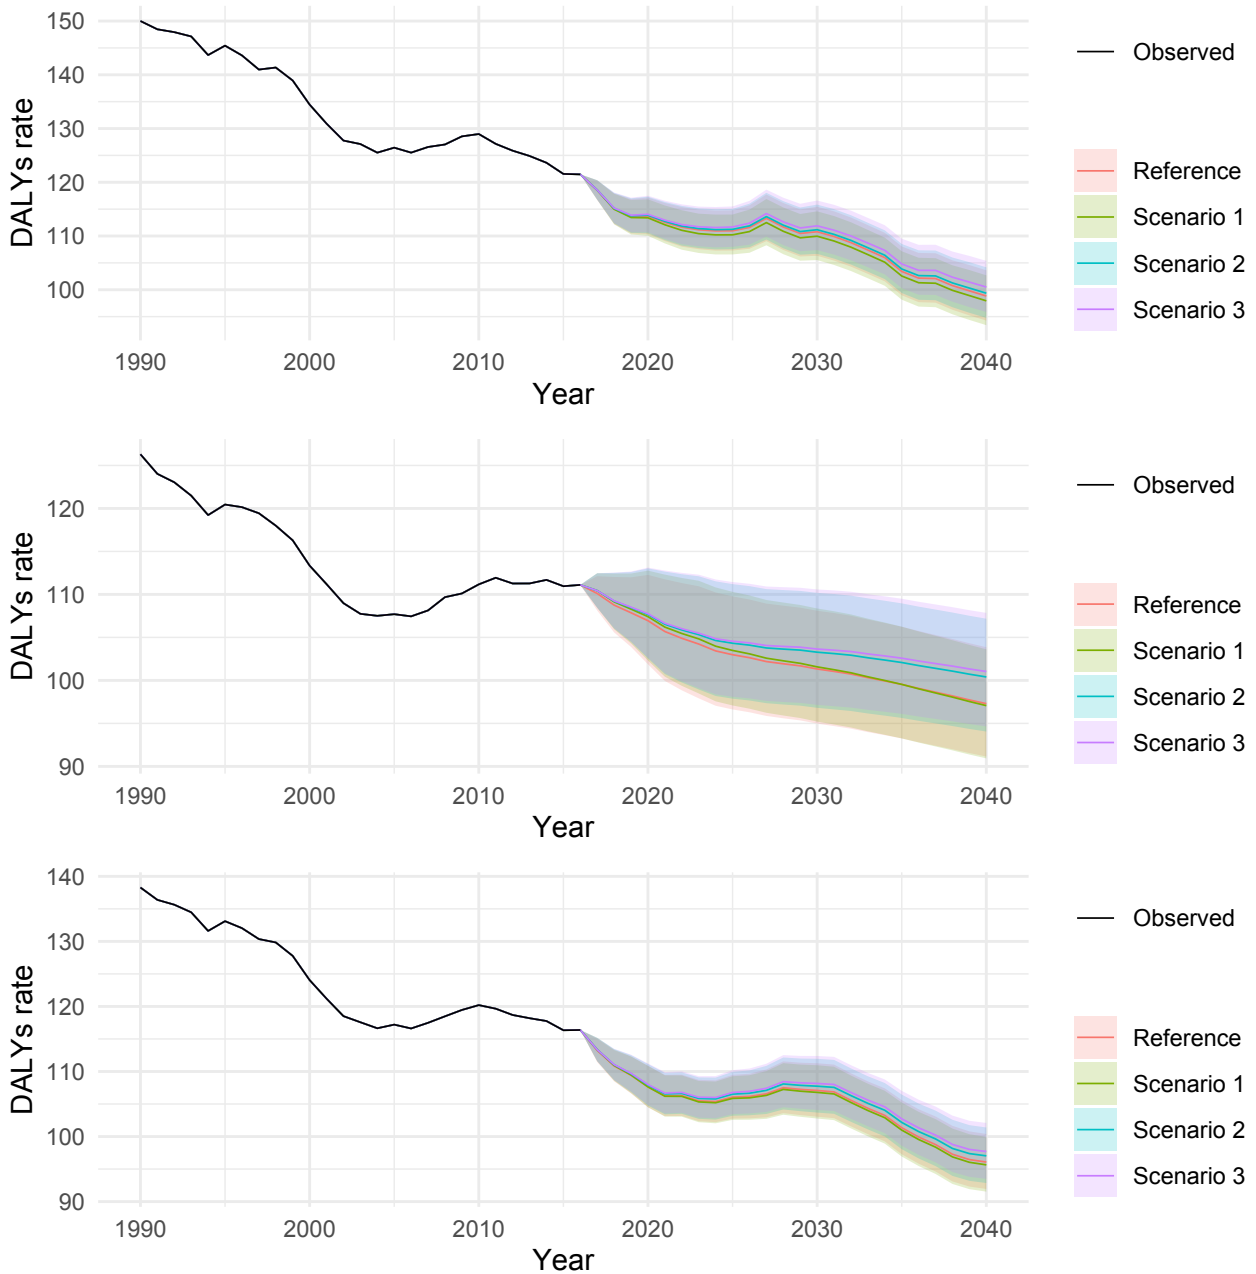

22  
 23 1: best scenario; 2: moderate scenario; 3: worse scenario. It is important to note that the y-axis scales are  
 24 different for each panel in order to make the differences between scenarios easier to understand.

25 **Supplementary Figure 5: Observed and predicted DALY rate (per 100,000 population) in the 50–69 age**  
 26 **group for chronic kidney diseases for reference forecast and three alternative scenarios, 1990–2040: (A)**  
 27 **men, (B) women, and (C) both sexes combined**

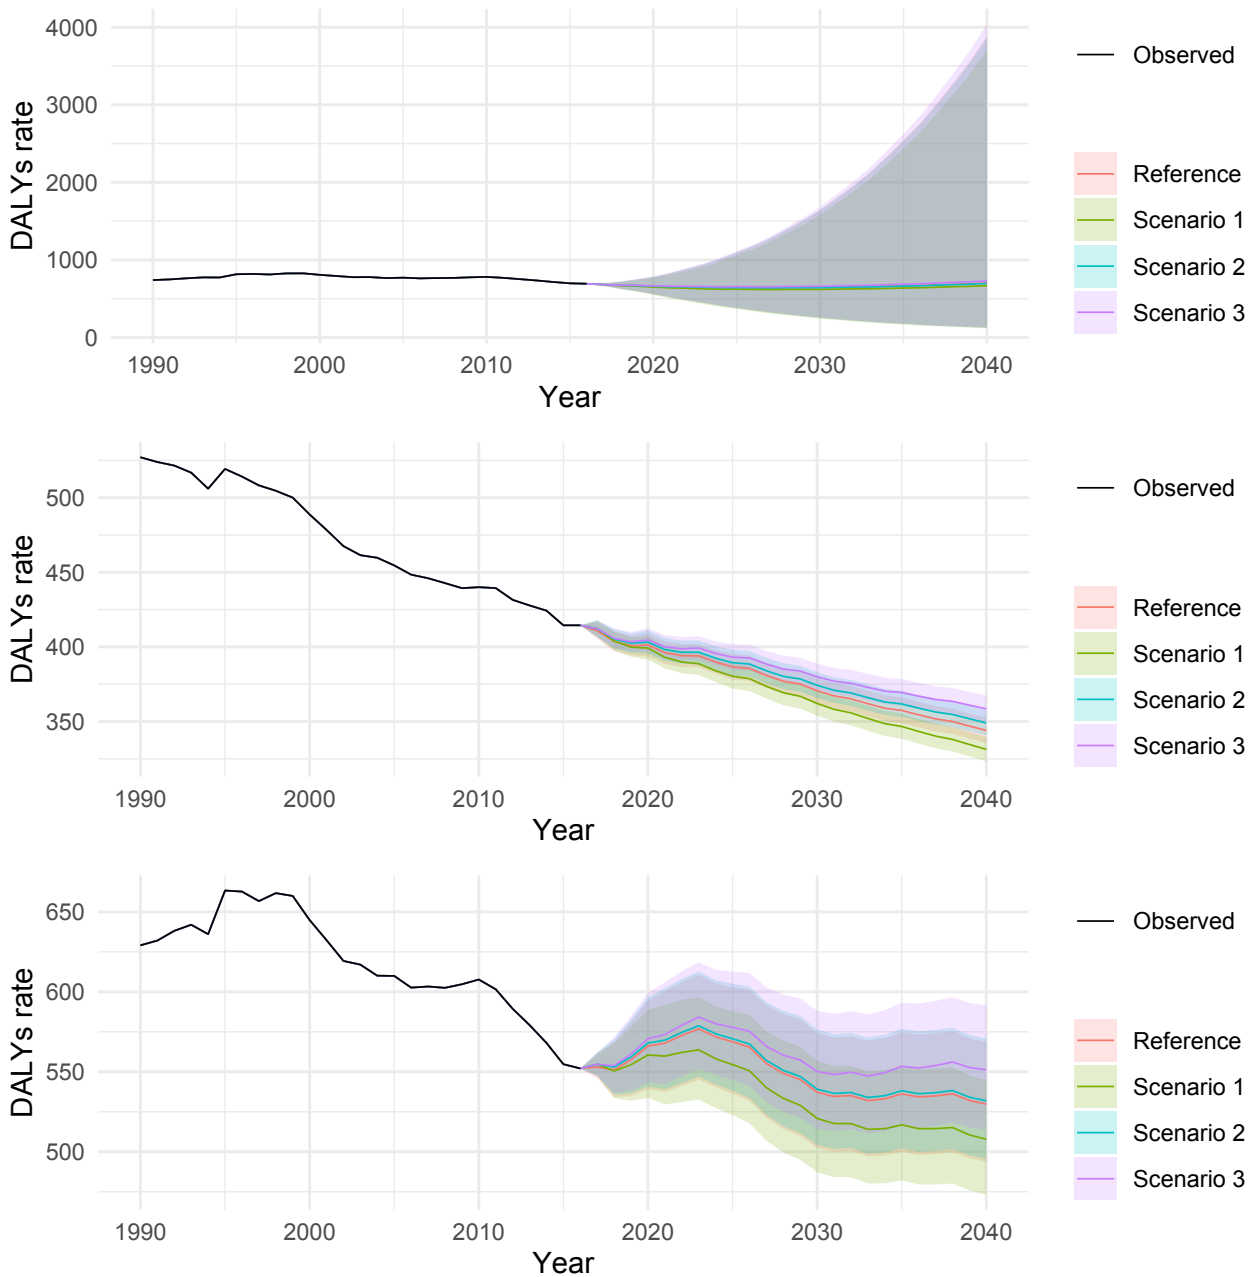

28  
 29 1: best scenario; 2: moderate scenario; 3: worse scenario. It is important to note that the y-axis scales are  
 30 different for each panel in order to make the differences between scenarios easier to understand.

31 **Supplementary Figure 6: Observed and predicted DALY rate (per 100,000 population) in the ≥70 age group**  
 32 **for chronic kidney diseases for reference forecast and three alternative scenarios, 1990–2040: (A) men, (B)**  
 33 **women, and (C) both sexes combined**

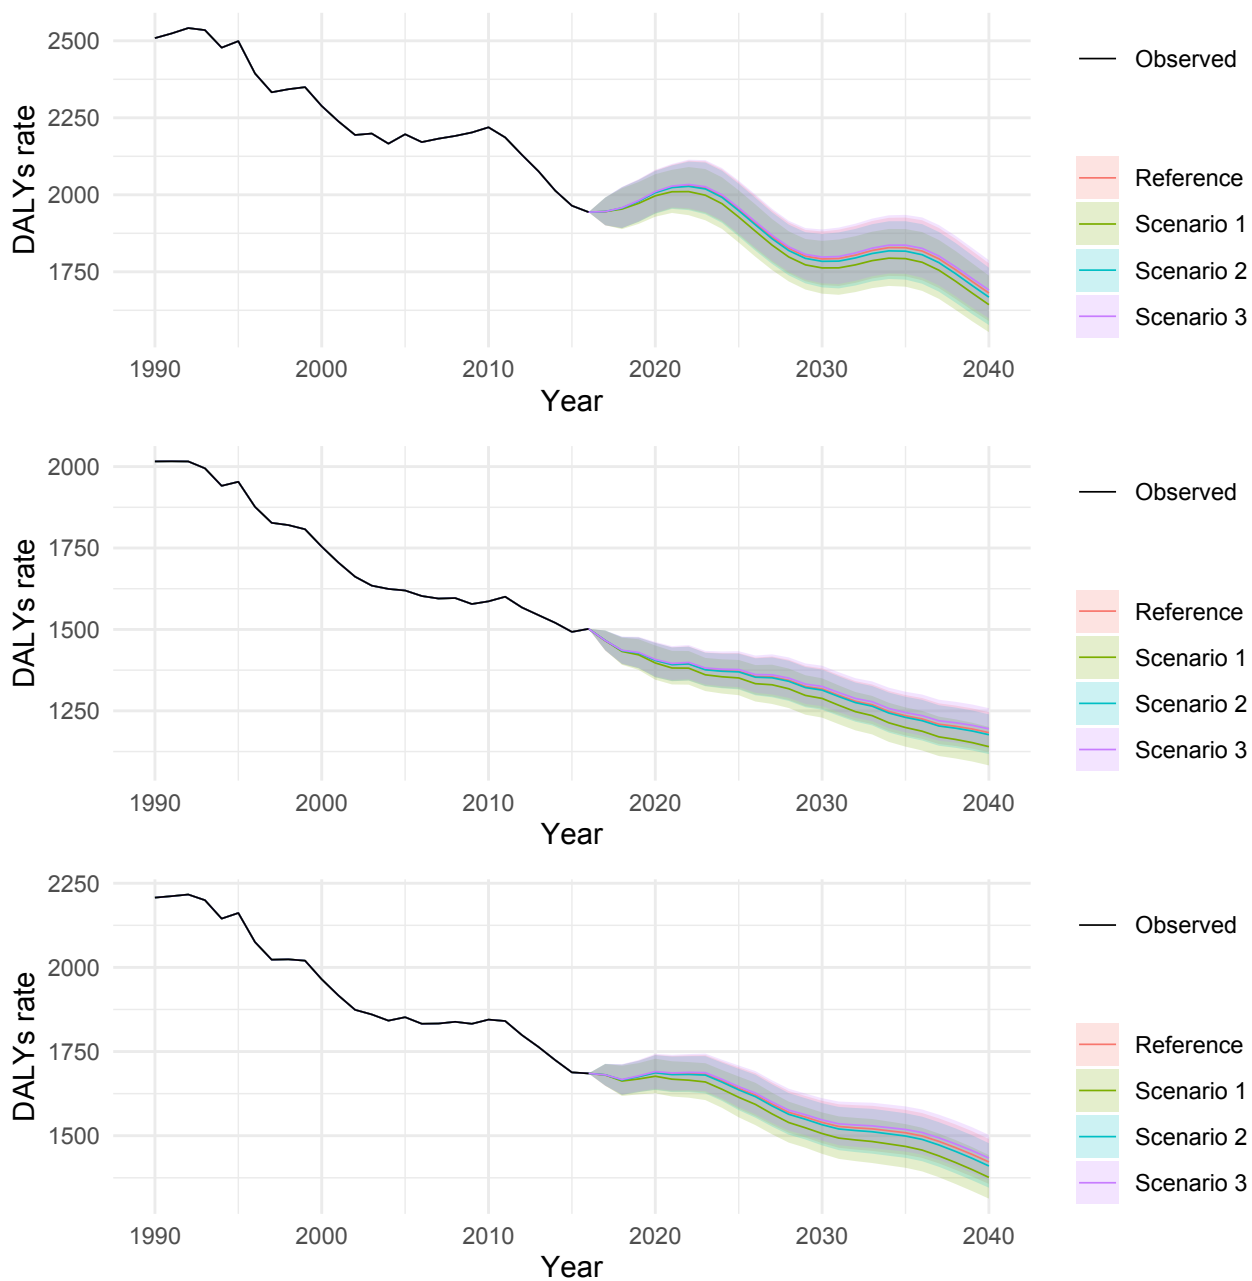

34  
 35 1: best scenario; 2: moderate scenario; 3: worse scenario. It is important to note that the y-axis scales are  
 36 different for each panel in order to make the differences between scenarios easier to understand.

37 **Supplementary Figure 7: Observed and predicted DALY rate (per 100,000 population) in the 20–49 age**  
 38 **group for stomach cancer for reference forecast and three alternative scenarios, 1990–2040: (A) men, (B)**  
 39 **women, and (C) both sexes combined**

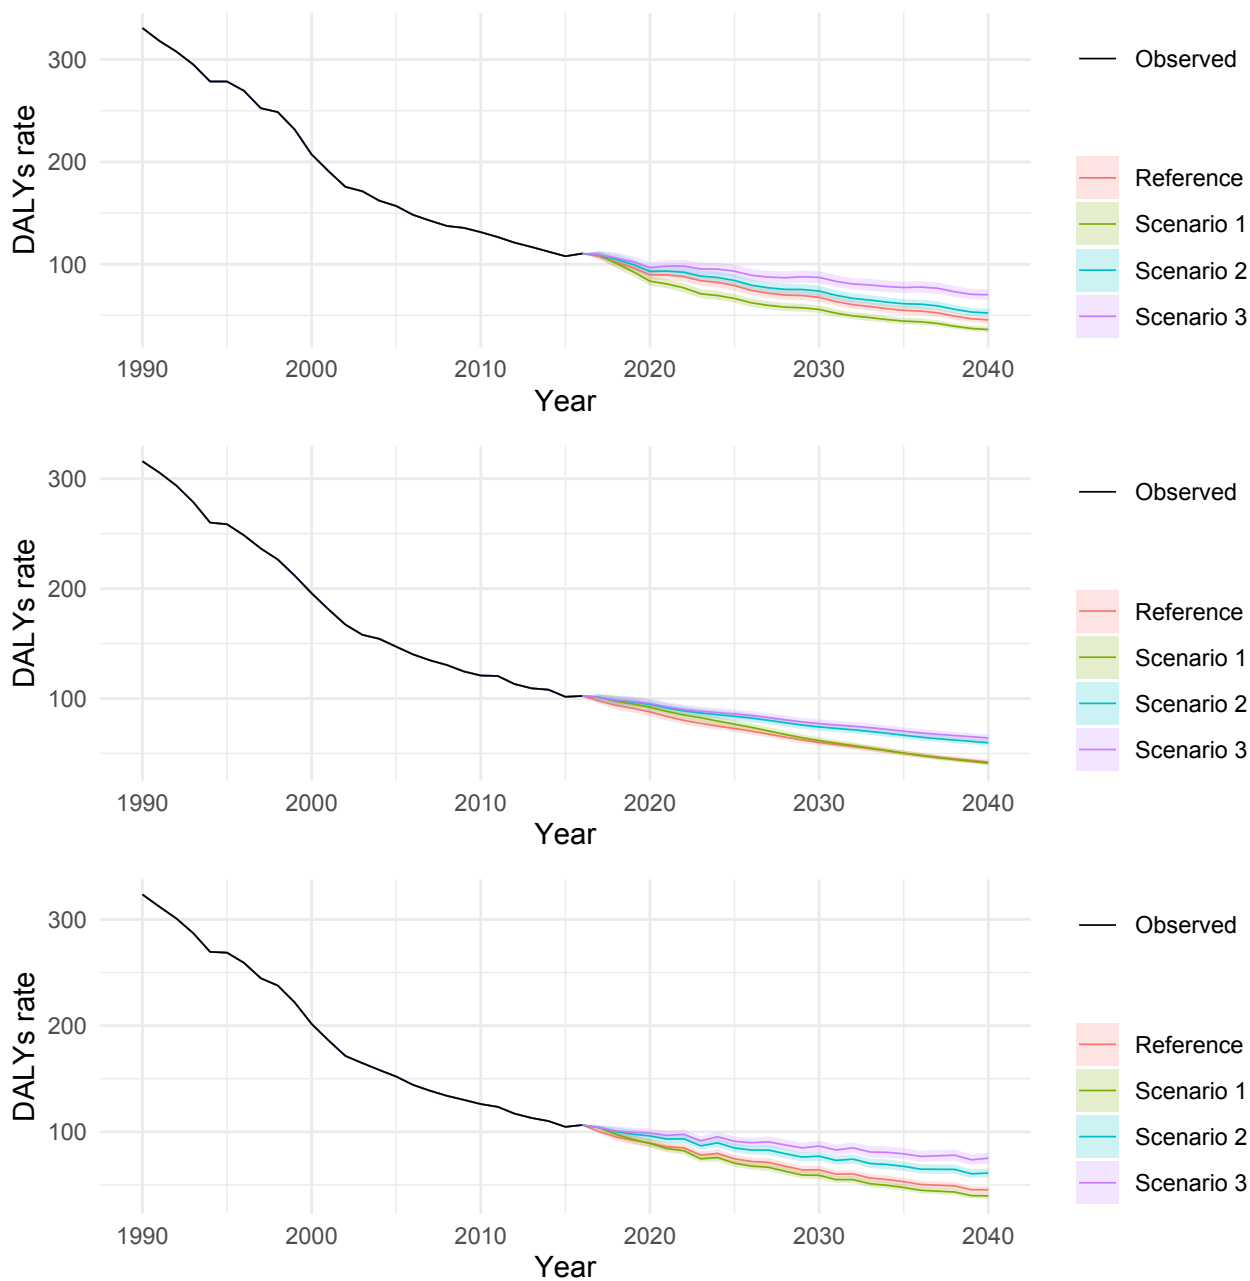

40  
 41 1: best scenario; 2: moderate scenario; 3: worse scenario. It is important to note that the y-axis scales are  
 42 different for each panel in order to make the differences between scenarios easier to understand.

43 **Supplementary Figure 8: Observed and predicted DALY rate (per 100,000 population) in the 50–69 age**  
 44 **group for stomach cancer for reference forecast and three alternative scenarios, 1990–2040: (A) men, (B)**  
 45 **women, and (C) both sexes combined**

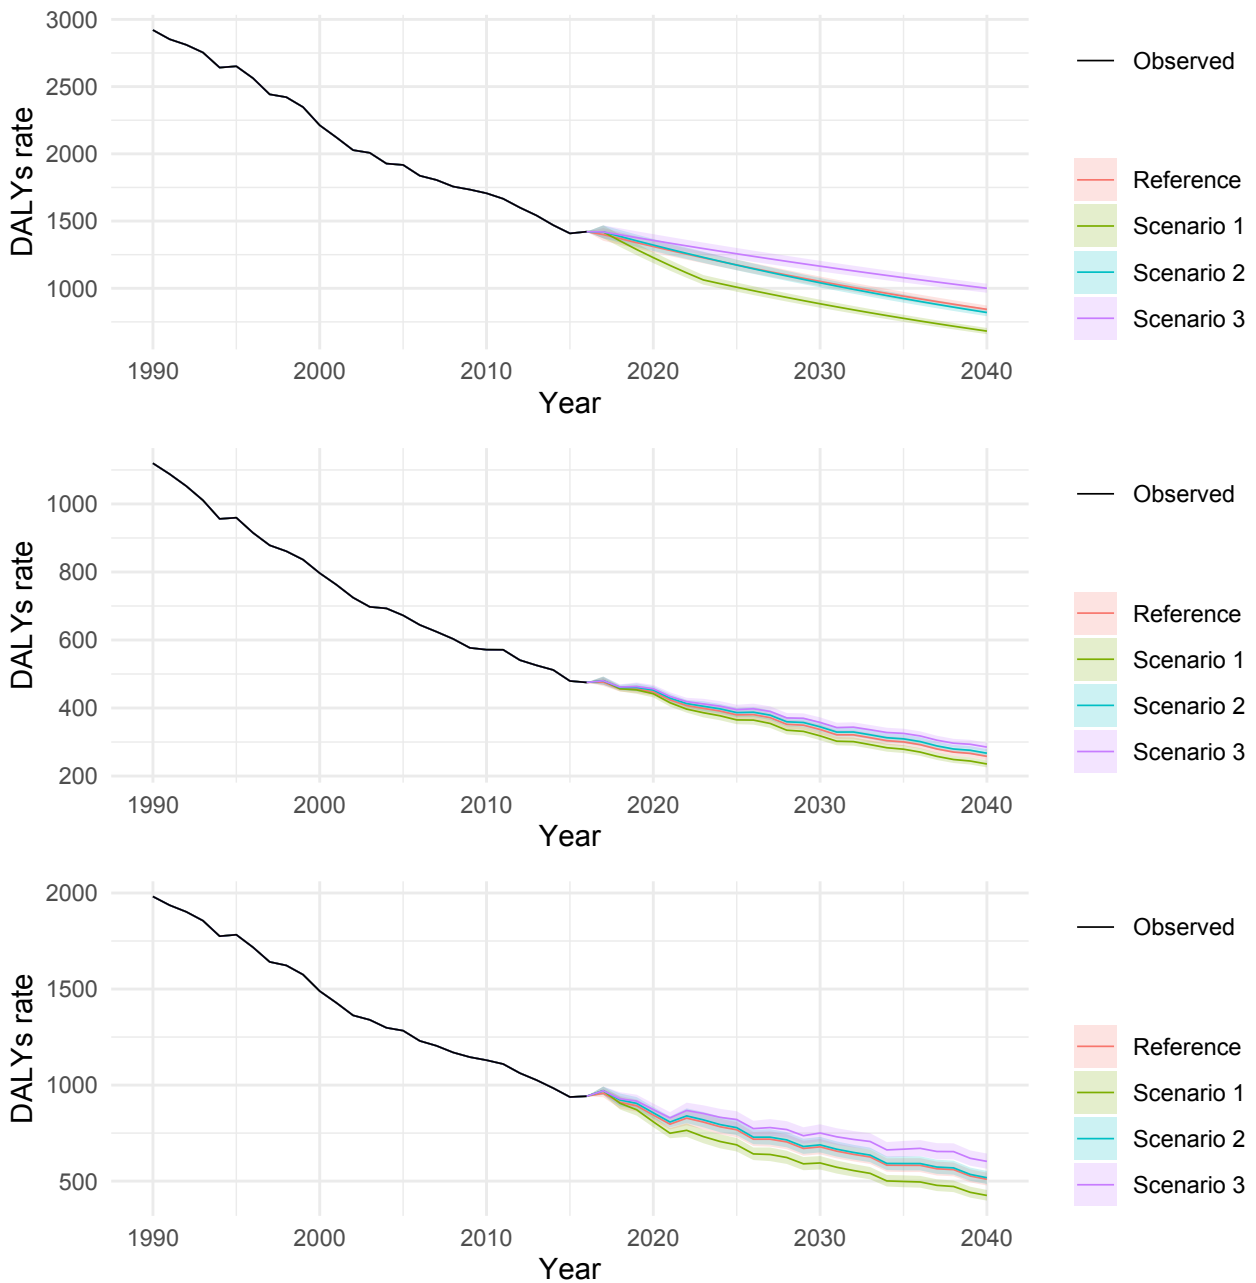

46  
 47 1: best scenario; 2: moderate scenario; 3: worse scenario. It is important to note that the y-axis scales are  
 48 different for each panel in order to make the differences between scenarios easier to understand.



49 **Supplementary Figure 9: Observed and predicted DALY rate (per 100,000 population) in the ≥70 age group**  
 50 **for stomach cancer for reference forecast and three alternative scenarios, 1990–2040: (A) men, (B)**  
 51 **women, and (C) both sexes combined**

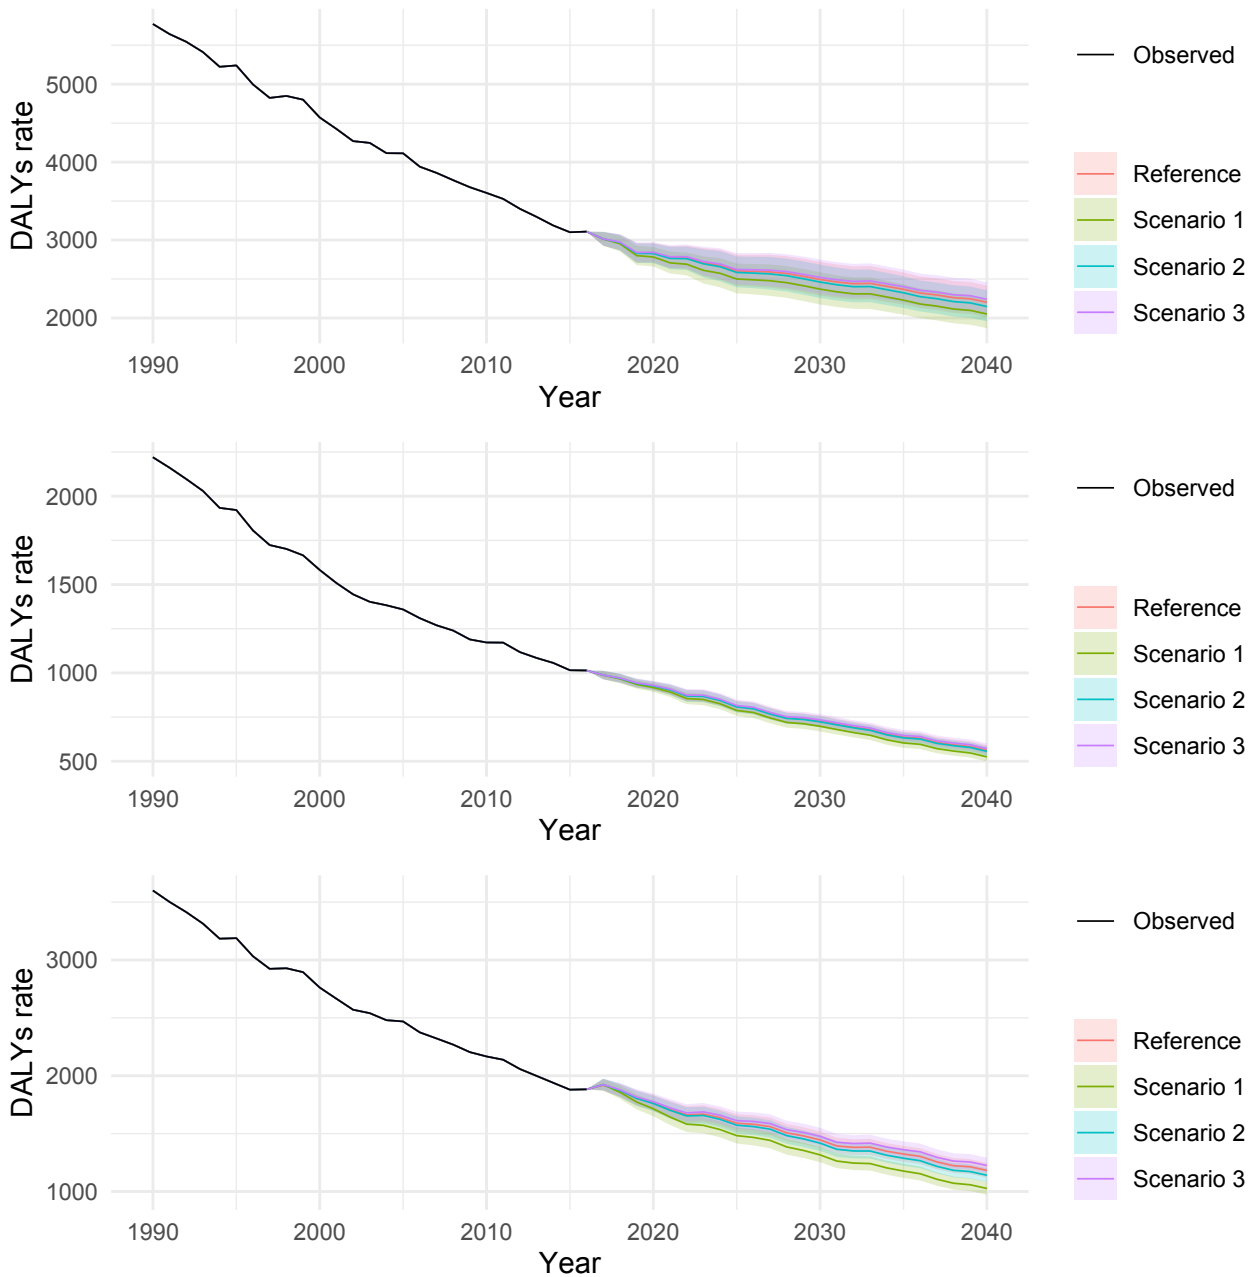

52  
 53 1: best scenario; 2: moderate scenario; 3: worse scenario. It is important to note that the y-axis scales are  
 54 different for each panel in order to make the differences between scenarios easier to understand.

55 **Supplementary Table 1: Predicted values of average salt intake (grams per day) for reference forecast and three alternative scenarios, by age groups for men**

56 **(A), women (B), and both sexes combined (C); and for all ages by sex (D), 2017–2040.**

| Men (A) |           |            |            |            |           |            |            |            |           |            |            |            |
|---------|-----------|------------|------------|------------|-----------|------------|------------|------------|-----------|------------|------------|------------|
| Year    | 20–49     |            |            |            | 50–69     |            |            |            | ≥70       |            |            |            |
|         | Reference | Scenario 1 | Scenario 2 | Scenario 3 | Reference | Scenario 1 | Scenario 2 | Scenario 3 | Reference | Scenario 1 | Scenario 2 | Scenario 3 |
| 2017    | 10.3      | 10.4       | 10.4       | 10.4       | 11.0      | 11.2       | 11.2       | 11.2       | 10.7      | 10.8       | 10.8       | 10.8       |
| 2018    | 10.1      | 10.0       | 10.3       | 10.4       | 10.9      | 10.7       | 11.1       | 11.2       | 10.7      | 10.3       | 10.7       | 10.8       |
| 2019    | 9.9       | 9.6        | 10.2       | 10.4       | 10.8      | 10.2       | 10.9       | 11.2       | 10.6      | 9.9        | 10.6       | 10.8       |
| 2020    | 9.8       | 9.2        | 10.1       | 10.4       | 10.7      | 9.6        | 10.8       | 11.2       | 10.6      | 9.4        | 10.4       | 10.8       |
| 2021    | 9.6       | 8.8        | 10.0       | 10.4       | 10.6      | 9.1        | 10.7       | 11.2       | 10.5      | 8.9        | 10.3       | 10.8       |
| 2022    | 9.5       | 8.4        | 9.9        | 10.4       | 10.5      | 8.5        | 10.5       | 11.2       | 10.5      | 8.5        | 10.2       | 10.8       |
| 2023    | 9.3       | 8.0        | 9.8        | 10.4       | 10.3      | 8.0        | 10.4       | 11.2       | 10.4      | 8.0        | 10.1       | 10.8       |
| 2024    | 9.2       | 7.8        | 9.7        | 10.4       | 10.2      | 7.8        | 10.2       | 11.2       | 10.4      | 7.8        | 9.9        | 10.8       |
| 2025    | 9.1       | 7.6        | 9.6        | 10.4       | 10.1      | 7.6        | 10.1       | 11.2       | 10.3      | 7.6        | 9.8        | 10.8       |
| 2026    | 8.9       | 7.5        | 9.5        | 10.4       | 10.0      | 7.5        | 10.0       | 11.2       | 10.3      | 7.5        | 9.7        | 10.8       |
| 2027    | 8.8       | 7.3        | 9.4        | 10.4       | 9.9       | 7.3        | 9.8        | 11.2       | 10.2      | 7.3        | 9.6        | 10.8       |
| 2028    | 8.6       | 7.1        | 9.2        | 10.4       | 9.8       | 7.1        | 9.7        | 11.2       | 10.2      | 7.1        | 9.5        | 10.8       |
| 2029    | 8.5       | 6.9        | 9.1        | 10.4       | 9.7       | 6.9        | 9.5        | 11.2       | 10.1      | 6.9        | 9.3        | 10.8       |

|      |     |     |     |      |     |     |     |      |      |     |     |      |
|------|-----|-----|-----|------|-----|-----|-----|------|------|-----|-----|------|
| 2030 | 8.3 | 6.8 | 9.0 | 10.4 | 9.6 | 6.8 | 9.4 | 11.2 | 10.1 | 6.8 | 9.2 | 10.8 |
| 2031 | 8.2 | 6.6 | 8.9 | 10.4 | 9.5 | 6.6 | 9.3 | 11.2 | 10.1 | 6.6 | 9.1 | 10.8 |
| 2032 | 8.0 | 6.4 | 8.8 | 10.4 | 9.3 | 6.4 | 9.1 | 11.2 | 10.0 | 6.4 | 9.0 | 10.8 |
| 2033 | 7.9 | 6.2 | 8.7 | 10.4 | 9.2 | 6.2 | 9.0 | 11.2 | 10.0 | 6.2 | 8.9 | 10.8 |
| 2034 | 7.8 | 6.1 | 8.6 | 10.4 | 9.1 | 6.1 | 8.8 | 11.2 | 9.9  | 6.1 | 8.7 | 10.8 |
| 2035 | 7.6 | 5.9 | 8.5 | 10.4 | 9.0 | 5.9 | 8.7 | 11.2 | 9.9  | 5.9 | 8.6 | 10.8 |
| 2036 | 7.5 | 5.7 | 8.4 | 10.4 | 8.9 | 5.7 | 8.6 | 11.2 | 9.8  | 5.7 | 8.5 | 10.8 |
| 2037 | 7.3 | 5.5 | 8.3 | 10.4 | 8.8 | 5.5 | 8.4 | 11.2 | 9.8  | 5.5 | 8.4 | 10.8 |
| 2038 | 7.2 | 5.4 | 8.2 | 10.4 | 8.7 | 5.4 | 8.3 | 11.2 | 9.7  | 5.4 | 8.2 | 10.8 |
| 2039 | 7.0 | 5.2 | 8.1 | 10.4 | 8.6 | 5.2 | 8.1 | 11.2 | 9.7  | 5.2 | 8.1 | 10.8 |
| 2040 | 6.9 | 5.0 | 8.0 | 10.4 | 8.5 | 5.0 | 8.0 | 11.2 | 9.6  | 5.0 | 8.0 | 10.8 |

Women (B)

|      | 20-49     |            |            |            | 50-69     |            |            |            | ≥70       |            |            |            |
|------|-----------|------------|------------|------------|-----------|------------|------------|------------|-----------|------------|------------|------------|
| Year | Reference | Scenario 1 | Scenario 2 | Scenario 3 | Reference | Scenario 1 | Scenario 2 | Scenario 3 | Reference | Scenario 1 | Scenario 2 | Scenario 3 |
| 2017 | 8.3       | 8.6        | 8.6        | 8.6        | 9.4       | 9.5        | 9.5        | 9.5        | 9.4       | 9.4        | 9.4        | 9.4        |
| 2018 | 8.2       | 8.5        | 8.5        | 8.6        | 9.3       | 9.3        | 9.5        | 9.5        | 9.3       | 9.2        | 9.4        | 9.4        |
| 2019 | 8.0       | 8.4        | 8.5        | 8.6        | 9.2       | 9.0        | 9.4        | 9.5        | 9.3       | 9.0        | 9.3        | 9.4        |

|      |     |     |     |     |     |     |     |     |     |     |     |     |
|------|-----|-----|-----|-----|-----|-----|-----|-----|-----|-----|-----|-----|
| 2020 | 7.9 | 8.3 | 8.5 | 8.6 | 9.1 | 8.8 | 9.3 | 9.5 | 9.3 | 8.7 | 9.3 | 9.4 |
| 2021 | 7.8 | 8.2 | 8.5 | 8.6 | 9.0 | 8.5 | 9.3 | 9.5 | 9.2 | 8.5 | 9.2 | 9.4 |
| 2022 | 7.6 | 8.1 | 8.4 | 8.6 | 8.9 | 8.3 | 9.2 | 9.5 | 9.2 | 8.2 | 9.1 | 9.4 |
| 2023 | 7.5 | 8.0 | 8.4 | 8.6 | 8.8 | 8.0 | 9.1 | 9.5 | 9.1 | 8.0 | 9.1 | 9.4 |
| 2024 | 7.4 | 7.8 | 8.4 | 8.6 | 8.7 | 7.8 | 9.1 | 9.5 | 9.1 | 7.8 | 9.0 | 9.4 |
| 2025 | 7.2 | 7.6 | 8.4 | 8.6 | 8.6 | 7.6 | 9.0 | 9.5 | 9.1 | 7.6 | 8.9 | 9.4 |
| 2026 | 7.1 | 7.5 | 8.3 | 8.6 | 8.5 | 7.5 | 8.9 | 9.5 | 9.0 | 7.5 | 8.9 | 9.4 |
| 2027 | 7.0 | 7.3 | 8.3 | 8.6 | 8.4 | 7.3 | 8.9 | 9.5 | 9.0 | 7.3 | 8.8 | 9.4 |
| 2028 | 6.8 | 7.1 | 8.3 | 8.6 | 8.3 | 7.1 | 8.8 | 9.5 | 9.0 | 7.1 | 8.8 | 9.4 |
| 2029 | 6.7 | 6.9 | 8.3 | 8.6 | 8.2 | 6.9 | 8.7 | 9.5 | 8.9 | 6.9 | 8.7 | 9.4 |
| 2030 | 6.6 | 6.8 | 8.2 | 8.6 | 8.1 | 6.8 | 8.7 | 9.5 | 8.9 | 6.8 | 8.6 | 9.4 |
| 2031 | 6.4 | 6.6 | 8.2 | 8.6 | 8.0 | 6.6 | 8.6 | 9.5 | 8.8 | 6.6 | 8.6 | 9.4 |
| 2032 | 6.3 | 6.4 | 8.2 | 8.6 | 7.9 | 6.4 | 8.5 | 9.5 | 8.8 | 6.4 | 8.5 | 9.4 |
| 2033 | 6.1 | 6.2 | 8.2 | 8.6 | 7.8 | 6.2 | 8.5 | 9.5 | 8.8 | 6.2 | 8.4 | 9.4 |
| 2034 | 6.0 | 6.1 | 8.1 | 8.6 | 7.7 | 6.1 | 8.4 | 9.5 | 8.7 | 6.1 | 8.4 | 9.4 |
| 2035 | 5.9 | 5.9 | 8.1 | 8.6 | 7.6 | 5.9 | 8.3 | 9.5 | 8.7 | 5.9 | 8.3 | 9.4 |
| 2036 | 5.7 | 5.7 | 8.1 | 8.6 | 7.5 | 5.7 | 8.3 | 9.5 | 8.7 | 5.7 | 8.3 | 9.4 |
| 2037 | 5.6 | 5.5 | 8.1 | 8.6 | 7.5 | 5.5 | 8.2 | 9.5 | 8.6 | 5.5 | 8.2 | 9.4 |
| 2038 | 5.5 | 5.4 | 8.0 | 8.6 | 7.4 | 5.4 | 8.1 | 9.5 | 8.6 | 5.4 | 8.1 | 9.4 |

|      |     |     |     |     |     |     |     |     |     |     |     |     |
|------|-----|-----|-----|-----|-----|-----|-----|-----|-----|-----|-----|-----|
| 2039 | 5.3 | 5.2 | 8.0 | 8.6 | 7.3 | 5.2 | 8.1 | 9.5 | 8.5 | 5.2 | 8.1 | 9.4 |
| 2040 | 5.2 | 5.0 | 8.0 | 8.6 | 7.2 | 5.0 | 8.0 | 9.5 | 8.5 | 5.0 | 8.0 | 9.4 |

Both sexes combined (C)

|      | 20–49     |            |            |            | 50–69     |            |            |            | ≥70       |            |            |            |
|------|-----------|------------|------------|------------|-----------|------------|------------|------------|-----------|------------|------------|------------|
| Year | Reference | Scenario 1 | Scenario 2 | Scenario 3 | Reference | Scenario 1 | Scenario 2 | Scenario 3 | Reference | Scenario 1 | Scenario 2 | Scenario 3 |
| 2017 | 9.2       | 9.4        | 9.4        | 9.4        | 10.1      | 0.3        | 10.3       | 10.3       | 10.0      | 10.0       | 10.0       | 10.0       |
| 2018 | 9.0       | 9.2        | 9.4        | 9.4        | 10.0      | 9.9        | 10.2       | 10.3       | 9.9       | 9.7        | 9.9        | 10.0       |
| 2019 | 8.9       | 9.0        | 9.3        | 9.4        | 9.9       | 9.5        | 10.1       | 10.3       | 9.9       | 9.4        | 9.9        | 10.0       |
| 2020 | 8.7       | 8.7        | 9.2        | 9.4        | 9.8       | 9.2        | 10.0       | 10.3       | 9.8       | 9.0        | 9.8        | 10.0       |
| 2021 | 8.6       | 8.5        | 9.2        | 9.4        | 9.7       | 8.8        | 9.9        | 10.3       | 9.8       | 8.7        | 9.7        | 10.0       |
| 2022 | 8.5       | 8.2        | 9.1        | 9.4        | 9.6       | 8.4        | 9.8        | 10.3       | 9.8       | 8.3        | 9.6        | 10.0       |
| 2023 | 8.3       | 8.0        | 9.1        | 9.4        | 9.5       | 8.0        | 9.7        | 10.3       | 9.7       | 8.0        | 9.5        | 10.0       |
| 2024 | 8.2       | 7.8        | 9.0        | 9.4        | 9.4       | 7.8        | 9.6        | 10.3       | 9.7       | 7.8        | 9.4        | 10.0       |
| 2025 | 8.0       | 7.6        | 8.9        | 9.4        | 9.3       | 7.6        | 9.5        | 10.3       | 9.6       | 7.6        | 9.3        | 10.0       |
| 2026 | 7.9       | 7.5        | 8.9        | 9.4        | 9.2       | 7.5        | 9.4        | 10.3       | 9.6       | 7.5        | 9.2        | 10.0       |
| 2027 | 7.8       | 7.3        | 8.8        | 9.4        | 9.1       | 7.3        | 9.3        | 10.3       | 9.6       | 7.3        | 9.1        | 10.0       |
| 2028 | 7.6       | 7.1        | 8.7        | 9.4        | 9.0       | 7.1        | 9.2        | 10.3       | 9.5       | 7.1        | 9.1        | 10.0       |

|      |     |     |     |     |     |     |     |      |     |     |     |      |
|------|-----|-----|-----|-----|-----|-----|-----|------|-----|-----|-----|------|
| 2029 | 7.5 | 6.9 | 8.7 | 9.4 | 8.9 | 6.9 | 9.1 | 10.3 | 9.5 | 6.9 | 9.0 | 10.0 |
| 2030 | 7.3 | 6.8 | 8.6 | 9.4 | 8.8 | 6.8 | 9.0 | 10.3 | 9.4 | 6.8 | 8.9 | 10.0 |
| 2031 | 7.2 | 6.6 | 8.6 | 9.4 | 8.7 | 6.6 | 8.9 | 10.3 | 9.4 | 6.6 | 8.8 | 10.0 |
| 2032 | 7.1 | 6.4 | 8.5 | 9.4 | 8.6 | 6.4 | 8.8 | 10.3 | 9.4 | 6.4 | 8.7 | 10.0 |
| 2033 | 6.9 | 6.2 | 8.4 | 9.4 | 8.5 | 6.2 | 8.7 | 10.3 | 9.3 | 6.2 | 8.6 | 10.0 |
| 2034 | 6.8 | 6.1 | 8.4 | 9.4 | 8.4 | 6.1 | 8.6 | 10.3 | 9.3 | 6.1 | 8.5 | 10.0 |
| 2035 | 6.6 | 5.9 | 8.3 | 9.4 | 8.3 | 5.9 | 8.5 | 10.3 | 9.2 | 5.9 | 8.4 | 10.0 |
| 2036 | 6.5 | 5.7 | 8.2 | 9.4 | 8.2 | 5.7 | 8.4 | 10.3 | 9.2 | 5.7 | 8.4 | 10.0 |
| 2037 | 6.4 | 5.5 | 8.2 | 9.4 | 8.1 | 5.5 | 8.3 | 10.3 | 9.2 | 5.5 | 8.3 | 10.0 |
| 2038 | 6.2 | 5.4 | 8.1 | 9.4 | 8.0 | 5.4 | 8.2 | 10.3 | 9.1 | 5.4 | 8.2 | 10.0 |
| 2039 | 6.1 | 5.2 | 8.1 | 9.4 | 7.9 | 5.2 | 8.1 | 10.3 | 9.1 | 5.2 | 8.1 | 10.0 |
| 2040 | 5.9 | 5.0 | 8.0 | 9.4 | 7.8 | 5.0 | 8.0 | 10.3 | 9.0 | 5.0 | 8.0 | 10.0 |

All age (D)

| Year | Men       |            |            |            | Women     |            |            |            | Both sexes combines |            |            |            |
|------|-----------|------------|------------|------------|-----------|------------|------------|------------|---------------------|------------|------------|------------|
|      | Reference | Scenario 1 | Scenario 2 | Scenario 3 | Reference | Scenario 1 | Scenario 2 | Scenario 3 | Reference           | Scenario 1 | Scenario 2 | Scenario 3 |
| 2017 | 10.5      | 10.8       | 10.8       | 10.8       | 9.0       | 9.2        | 9.2        | 9.2        | 9.7                 | 9.9        | 9.9        | 9.9        |
| 2018 | 10.4      | 10.3       | 10.7       | 10.8       | 8.9       | 9.0        | 9.1        | 9.2        | 9.6                 | 9.6        | 9.9        | 9.9        |

|      |      |     |      |      |     |     |     |     |     |     |     |     |
|------|------|-----|------|------|-----|-----|-----|-----|-----|-----|-----|-----|
| 2019 | 10.3 | 9.9 | 10.6 | 10.8 | 8.8 | 8.8 | 9.1 | 9.2 | 9.5 | 9.3 | 9.8 | 9.9 |
| 2020 | 10.1 | 9.4 | 10.5 | 10.8 | 8.7 | 8.6 | 9.0 | 9.2 | 9.4 | 9.0 | 9.7 | 9.9 |
| 2021 | 10.0 | 8.9 | 10.3 | 10.8 | 8.6 | 8.4 | 9.0 | 9.2 | 9.2 | 8.6 | 9.6 | 9.9 |
| 2022 | 9.9  | 8.5 | 10.2 | 10.8 | 8.5 | 8.2 | 8.9 | 9.2 | 9.1 | 8.3 | 9.5 | 9.9 |
| 2023 | 9.8  | 8.0 | 10.1 | 10.8 | 8.4 | 8.0 | 8.9 | 9.2 | 9.0 | 8.0 | 9.4 | 9.9 |
| 2024 | 9.6  | 7.8 | 10.0 | 10.8 | 8.3 | 7.8 | 8.8 | 9.2 | 8.9 | 7.8 | 9.3 | 9.9 |
| 2025 | 9.5  | 7.6 | 9.8  | 10.8 | 8.2 | 7.6 | 8.8 | 9.2 | 8.8 | 7.6 | 9.3 | 9.9 |
| 2026 | 9.4  | 7.5 | 9.7  | 10.8 | 8.1 | 7.5 | 8.7 | 9.2 | 8.7 | 7.5 | 9.2 | 9.9 |
| 2027 | 9.3  | 7.3 | 9.6  | 10.8 | 8.0 | 7.3 | 8.7 | 9.2 | 8.5 | 7.3 | 9.1 | 9.9 |
| 2028 | 9.1  | 7.1 | 9.5  | 10.8 | 7.9 | 7.1 | 8.6 | 9.2 | 8.4 | 7.1 | 9.0 | 9.9 |
| 2029 | 9.0  | 6.9 | 9.3  | 10.8 | 7.8 | 6.9 | 8.6 | 9.2 | 8.3 | 6.9 | 8.9 | 9.9 |
| 2030 | 8.9  | 6.8 | 9.2  | 10.8 | 7.7 | 6.8 | 8.5 | 9.2 | 8.2 | 6.8 | 8.8 | 9.9 |
| 2031 | 8.8  | 6.6 | 9.1  | 10.8 | 7.6 | 6.6 | 8.5 | 9.2 | 8.1 | 6.6 | 8.8 | 9.9 |
| 2032 | 8.6  | 6.4 | 9.0  | 10.8 | 7.5 | 6.4 | 8.4 | 9.2 | 7.9 | 6.4 | 8.7 | 9.9 |
| 2033 | 8.5  | 6.2 | 8.9  | 10.8 | 7.4 | 6.2 | 8.4 | 9.2 | 7.8 | 6.2 | 8.6 | 9.9 |
| 2034 | 8.4  | 6.1 | 8.7  | 10.8 | 7.3 | 6.1 | 8.3 | 9.2 | 7.7 | 6.1 | 8.5 | 9.9 |
| 2035 | 8.3  | 5.9 | 8.6  | 10.8 | 7.2 | 5.9 | 8.3 | 9.2 | 7.6 | 5.9 | 8.4 | 9.9 |
| 2036 | 8.1  | 5.7 | 8.5  | 10.8 | 7.1 | 5.7 | 8.2 | 9.2 | 7.5 | 5.7 | 8.3 | 9.9 |
| 2037 | 8.0  | 5.5 | 8.4  | 10.8 | 6.9 | 5.5 | 8.2 | 9.2 | 7.4 | 5.5 | 8.3 | 9.9 |

|      |     |     |     |      |     |     |     |     |     |     |     |     |
|------|-----|-----|-----|------|-----|-----|-----|-----|-----|-----|-----|-----|
| 2038 | 7.9 | 5.4 | 8.2 | 10.8 | 6.8 | 5.4 | 8.1 | 9.2 | 7.2 | 5.4 | 8.2 | 9.9 |
| 2039 | 7.8 | 5.2 | 8.1 | 10.8 | 6.7 | 5.2 | 8.1 | 9.2 | 7.1 | 5.2 | 8.1 | 9.9 |
| 2040 | 7.6 | 5.0 | 8.0 | 10.8 | 6.6 | 5.0 | 8.0 | 9.2 | 7.0 | 5.0 | 8.0 | 9.9 |

57 1: best scenario; 2: moderate scenario; 3: worse scenario



58 **Supplementary Table 2: Predicted values of covariates by age groups for men (A), women (B), and both sexes combined (C); and for all ages by sex (D), 2017–**

59 **2040.**

| Men (A) |       |             |                    |                             |       |             |                    |                             |       |             |                    |                             |
|---------|-------|-------------|--------------------|-----------------------------|-------|-------------|--------------------|-----------------------------|-------|-------------|--------------------|-----------------------------|
| Year    | 20–49 |             |                    |                             | 50–69 |             |                    |                             | ≥70   |             |                    |                             |
|         | SDI   | Obesity (%) | Current smoker (%) | Current alcohol drinker (%) | SDI   | Obesity (%) | Current smoker (%) | Current alcohol drinker (%) | SDI   | Obesity (%) | Current smoker (%) | Current alcohol drinker (%) |
| 2017    | 0.865 | 32.0        | 40.9               | 26.8                        | 0.865 | 33.7        | 31.2               | 44.5                        | 0.865 | 24.7        | 10.9               | 24.1                        |
| 2018    | 0.867 | 32.2        | 40.9               | 25.9                        | 0.867 | 34.1        | 30.6               | 44.5                        | 0.867 | 24.7        | 9.9                | 24.1                        |
| 2019    | 0.868 | 31.8        | 40.9               | 24.5                        | 0.868 | 34.4        | 30.0               | 44.5                        | 0.868 | 24.7        | 8.9                | 24.1                        |
| 2020    | 0.870 | 32.6        | 40.9               | 22.0                        | 0.870 | 34.8        | 29.2               | 44.5                        | 0.870 | 24.7        | 7.9                | 24.1                        |
| 2021    | 0.872 | 32.9        | 40.9               | 23.6                        | 0.872 | 35.1        | 28.6               | 44.5                        | 0.872 | 24.7        | 6.9                | 24.1                        |
| 2022    | 0.874 | 32.9        | 40.9               | 21.2                        | 0.874 | 35.4        | 27.9               | 44.5                        | 0.874 | 24.7        | 6.0                | 24.1                        |
| 2023    | 0.875 | 33.4        | 40.9               | 19.1                        | 0.875 | 35.8        | 27.2               | 44.5                        | 0.875 | 24.7        | 5.0                | 24.1                        |
| 2024    | 0.877 | 33.8        | 40.9               | 19.1                        | 0.877 | 36.1        | 26.5               | 44.5                        | 0.877 | 24.7        | 4.0                | 24.1                        |
| 2025    | 0.879 | 33.9        | 40.9               | 18.5                        | 0.879 | 36.5        | 25.9               | 44.5                        | 0.879 | 24.7        | 3.0                | 24.1                        |
| 2026    | 0.881 | 34.3        | 40.9               | 17.2                        | 0.881 | 36.8        | 25.2               | 44.5                        | 0.881 | 24.7        | 2.0                | 24.1                        |
| 2027    | 0.882 | 34.6        | 40.9               | 18.1                        | 0.882 | 37.2        | 24.5               | 44.5                        | 0.882 | 24.7        | 1.0                | 24.1                        |
| 2028    | 0.884 | 34.9        | 40.9               | 16.2                        | 0.884 | 37.5        | 23.8               | 44.5                        | 0.884 | 24.7        | 0.0                | 24.1                        |

|      |       |      |      |      |       |      |      |      |       |      |     |      |
|------|-------|------|------|------|-------|------|------|------|-------|------|-----|------|
| 2029 | 0.886 | 35.2 | 40.9 | 14.1 | 0.886 | 37.8 | 23.2 | 44.5 | 0.886 | 24.7 | 0.0 | 24.1 |
| 2030 | 0.888 | 35.5 | 40.9 | 14.8 | 0.888 | 38.2 | 22.5 | 44.5 | 0.888 | 24.7 | 0.0 | 24.1 |
| 2031 | 0.889 | 35.8 | 40.9 | 13.7 | 0.889 | 38.5 | 21.8 | 44.5 | 0.889 | 24.7 | 0.0 | 24.1 |
| 2032 | 0.891 | 36.1 | 40.9 | 12.0 | 0.891 | 38.9 | 21.1 | 44.5 | 0.891 | 24.7 | 0.0 | 24.1 |
| 2033 | 0.893 | 36.4 | 40.9 | 11.8 | 0.893 | 39.2 | 20.4 | 44.5 | 0.893 | 24.7 | 0.0 | 24.1 |
| 2034 | 0.894 | 36.7 | 40.9 | 9.8  | 0.894 | 39.5 | 19.8 | 44.5 | 0.894 | 24.7 | 0.0 | 24.1 |
| 2035 | 0.896 | 37.0 | 40.9 | 8.0  | 0.896 | 39.9 | 19.1 | 44.5 | 0.896 | 24.7 | 0.0 | 24.1 |
| 2036 | 0.898 | 37.3 | 40.9 | 8.8  | 0.898 | 40.2 | 18.4 | 44.5 | 0.898 | 24.7 | 0.0 | 24.1 |
| 2037 | 0.900 | 37.6 | 40.9 | 7.4  | 0.900 | 40.6 | 17.7 | 44.5 | 0.900 | 24.7 | 0.0 | 24.1 |
| 2038 | 0.901 | 37.9 | 40.9 | 5.7  | 0.901 | 40.9 | 17.1 | 44.5 | 0.901 | 24.7 | 0.0 | 24.1 |
| 2039 | 0.903 | 38.2 | 40.9 | 5.6  | 0.903 | 41.3 | 16.4 | 44.5 | 0.903 | 24.7 | 0.0 | 24.1 |
| 2040 | 0.905 | 38.5 | 40.9 | 4.2  | 0.905 | 41.6 | 15.7 | 44.5 | 0.905 | 24.7 | 0.0 | 24.1 |

Women (B)

|      | 20–49 |             |                    |                             | 50–69 |             |                    |                             | ≥70   |             |                    |                             |
|------|-------|-------------|--------------------|-----------------------------|-------|-------------|--------------------|-----------------------------|-------|-------------|--------------------|-----------------------------|
| Year | SDI   | Obesity (%) | Current smoker (%) | Current alcohol drinker (%) | SDI   | Obesity (%) | Current smoker (%) | Current alcohol drinker (%) | SDI   | Obesity (%) | Current smoker (%) | Current alcohol drinker (%) |
| 2017 | 0.865 | 14.0        | 11.4               | 10.7                        | 0.865 | 21.8        | 8.3                | 9.1                         | 0.865 | 27.2        | 1.8                | 1.7                         |

|      |       |      |      |      |       |      |     |     |       |      |     |     |
|------|-------|------|------|------|-------|------|-----|-----|-------|------|-----|-----|
| 2018 | 0.867 | 14.0 | 11.7 | 10.7 | 0.867 | 21.5 | 8.3 | 8.0 | 0.867 | 26.5 | 1.7 | 1.7 |
| 2019 | 0.868 | 14.0 | 12.0 | 10.7 | 0.868 | 21.2 | 8.3 | 8.8 | 0.868 | 26.5 | 1.5 | 1.7 |
| 2020 | 0.870 | 14.0 | 12.3 | 10.7 | 0.870 | 20.9 | 8.3 | 7.7 | 0.870 | 26.5 | 1.3 | 1.7 |
| 2021 | 0.872 | 14.0 | 12.5 | 10.7 | 0.872 | 20.6 | 8.3 | 7.2 | 0.872 | 26.5 | 1.2 | 1.7 |
| 2022 | 0.874 | 14.0 | 12.7 | 10.7 | 0.874 | 20.3 | 8.3 | 7.5 | 0.874 | 26.5 | 1.0 | 1.7 |
| 2023 | 0.875 | 14.0 | 12.8 | 10.7 | 0.875 | 20.0 | 8.3 | 8.2 | 0.875 | 26.5 | 0.8 | 1.7 |
| 2024 | 0.877 | 14.0 | 12.9 | 10.7 | 0.877 | 19.7 | 8.3 | 7.3 | 0.877 | 26.5 | 0.7 | 1.7 |
| 2025 | 0.879 | 14.0 | 13.0 | 10.7 | 0.879 | 19.4 | 8.3 | 8.5 | 0.879 | 26.5 | 0.5 | 1.7 |
| 2026 | 0.881 | 14.0 | 13.1 | 10.7 | 0.881 | 19.1 | 8.3 | 9.0 | 0.881 | 26.5 | 0.3 | 1.7 |
| 2027 | 0.882 | 14.0 | 13.1 | 10.7 | 0.882 | 18.8 | 8.3 | 8.6 | 0.882 | 26.5 | 0.2 | 1.7 |
| 2028 | 0.884 | 14.0 | 13.2 | 10.7 | 0.884 | 18.5 | 8.3 | 9.2 | 0.884 | 26.5 | 0.0 | 1.7 |
| 2029 | 0.886 | 14.0 | 13.2 | 10.7 | 0.886 | 18.2 | 8.3 | 9.6 | 0.886 | 26.5 | 0.0 | 1.7 |
| 2030 | 0.888 | 14.0 | 13.3 | 10.7 | 0.888 | 17.9 | 8.3 | 9.0 | 0.888 | 26.5 | 0.0 | 1.7 |
| 2031 | 0.889 | 14.0 | 13.3 | 10.7 | 0.889 | 17.6 | 8.3 | 8.5 | 0.889 | 26.5 | 0.0 | 1.7 |
| 2032 | 0.891 | 14.0 | 13.3 | 10.7 | 0.891 | 17.3 | 8.3 | 9.1 | 0.891 | 26.5 | 0.0 | 1.7 |
| 2033 | 0.893 | 14.0 | 13.3 | 10.7 | 0.893 | 17.1 | 8.3 | 8.1 | 0.893 | 26.5 | 0.0 | 1.7 |
| 2034 | 0.894 | 14.0 | 13.4 | 10.7 | 0.894 | 16.8 | 8.3 | 7.9 | 0.894 | 26.5 | 0.0 | 1.7 |
| 2035 | 0.896 | 14.0 | 13.4 | 10.7 | 0.896 | 16.5 | 8.3 | 8.1 | 0.896 | 26.5 | 0.0 | 1.7 |
| 2036 | 0.898 | 14.0 | 13.4 | 10.7 | 0.898 | 16.2 | 8.3 | 7.9 | 0.898 | 26.5 | 0.0 | 1.7 |

|      |       |      |      |      |       |      |     |     |       |      |     |     |
|------|-------|------|------|------|-------|------|-----|-----|-------|------|-----|-----|
| 2037 | 0.900 | 14.0 | 13.4 | 10.7 | 0.900 | 15.9 | 8.3 | 7.6 | 0.900 | 26.5 | 0.0 | 1.7 |
| 2038 | 0.901 | 14.0 | 13.4 | 10.7 | 0.901 | 15.6 | 8.3 | 8.3 | 0.901 | 26.5 | 0.0 | 1.7 |
| 2039 | 0.903 | 14.0 | 13.4 | 10.7 | 0.903 | 15.3 | 8.3 | 8.5 | 0.903 | 26.5 | 0.0 | 1.7 |
| 2040 | 0.905 | 14.0 | 13.4 | 10.7 | 0.905 | 15.0 | 8.3 | 8.2 | 0.905 | 26.5 | 0.0 | 1.7 |

Both sexes combined (C)

| Year | 20–49 |             |                    |                             | 50–69 |             |                    |                             | ≥70   |             |                    |                             |
|------|-------|-------------|--------------------|-----------------------------|-------|-------------|--------------------|-----------------------------|-------|-------------|--------------------|-----------------------------|
|      | SDI   | Obesity (%) | Current smoker (%) | Current alcohol drinker (%) | SDI   | Obesity (%) | Current smoker (%) | Current alcohol drinker (%) | SDI   | Obesity (%) | Current smoker (%) | Current alcohol drinker (%) |
| 2017 | 0.865 | 21.9        | 25.3               | 19.8                        | 0.865 | 28.0        | 20.1               | 25.7                        | 0.865 | 25.3        | 5.9                | 11.5                        |
| 2018 | 0.867 | 21.9        | 25.1               | 19.8                        | 0.867 | 27.1        | 20.1               | 25.7                        | 0.867 | 25.3        | 5.4                | 11.5                        |
| 2019 | 0.868 | 21.9        | 25.2               | 19.8                        | 0.868 | 28.3        | 20.1               | 25.7                        | 0.868 | 25.3        | 4.9                | 11.5                        |
| 2020 | 0.870 | 21.9        | 25.1               | 19.8                        | 0.870 | 27.7        | 20.1               | 25.7                        | 0.870 | 25.3        | 4.4                | 11.5                        |
| 2021 | 0.872 | 21.9        | 25.2               | 19.8                        | 0.872 | 27.7        | 20.1               | 25.7                        | 0.872 | 25.3        | 3.9                | 11.5                        |
| 2022 | 0.874 | 21.9        | 25.2               | 19.8                        | 0.874 | 27.7        | 20.1               | 25.7                        | 0.874 | 25.3        | 3.4                | 11.5                        |
| 2023 | 0.875 | 21.9        | 25.2               | 19.8                        | 0.875 | 27.7        | 20.1               | 25.7                        | 0.875 | 25.3        | 2.9                | 11.5                        |
| 2024 | 0.877 | 21.9        | 25.2               | 19.8                        | 0.877 | 27.7        | 20.1               | 25.7                        | 0.877 | 25.3        | 2.4                | 11.5                        |
| 2025 | 0.879 | 21.9        | 25.2               | 19.8                        | 0.879 | 27.7        | 20.1               | 25.7                        | 0.879 | 25.3        | 1.9                | 11.5                        |

|      |       |      |      |      |       |      |      |      |       |      |     |      |
|------|-------|------|------|------|-------|------|------|------|-------|------|-----|------|
| 2026 | 0.881 | 21.9 | 25.2 | 19.8 | 0.881 | 27.7 | 20.1 | 25.7 | 0.881 | 25.3 | 1.5 | 11.5 |
| 2027 | 0.882 | 21.9 | 25.2 | 19.8 | 0.882 | 27.7 | 20.1 | 25.7 | 0.882 | 25.3 | 1.0 | 11.5 |
| 2028 | 0.884 | 21.9 | 25.2 | 19.8 | 0.884 | 27.7 | 20.1 | 25.7 | 0.884 | 25.3 | 0.5 | 11.5 |
| 2029 | 0.886 | 21.9 | 25.2 | 19.8 | 0.886 | 27.7 | 20.1 | 25.7 | 0.886 | 25.3 | 0.0 | 11.5 |
| 2030 | 0.888 | 21.9 | 25.2 | 19.8 | 0.888 | 27.7 | 20.1 | 25.7 | 0.888 | 25.3 | 0.0 | 11.5 |
| 2031 | 0.889 | 21.9 | 25.2 | 19.8 | 0.889 | 27.7 | 20.1 | 25.7 | 0.889 | 25.3 | 0.0 | 11.5 |
| 2032 | 0.891 | 21.9 | 25.2 | 19.8 | 0.891 | 27.7 | 20.1 | 25.7 | 0.891 | 25.3 | 0.0 | 11.5 |
| 2033 | 0.893 | 21.9 | 25.2 | 19.8 | 0.893 | 27.7 | 20.1 | 25.7 | 0.893 | 25.3 | 0.0 | 11.5 |
| 2034 | 0.894 | 21.9 | 25.2 | 19.8 | 0.894 | 27.7 | 20.1 | 25.7 | 0.894 | 25.3 | 0.0 | 11.5 |
| 2035 | 0.896 | 21.9 | 25.2 | 19.8 | 0.896 | 27.7 | 20.1 | 25.7 | 0.896 | 25.3 | 0.0 | 11.5 |
| 2036 | 0.898 | 21.9 | 25.2 | 19.8 | 0.898 | 27.7 | 20.1 | 25.7 | 0.898 | 25.3 | 0.0 | 11.5 |
| 2037 | 0.900 | 21.9 | 25.2 | 19.8 | 0.900 | 27.7 | 20.1 | 25.7 | 0.900 | 25.3 | 0.0 | 11.5 |
| 2038 | 0.901 | 21.9 | 25.2 | 19.8 | 0.901 | 27.7 | 20.1 | 25.7 | 0.901 | 25.3 | 0.0 | 11.5 |
| 2039 | 0.903 | 21.9 | 25.2 | 19.8 | 0.903 | 27.7 | 20.1 | 25.7 | 0.903 | 25.3 | 0.0 | 11.5 |
| 2040 | 0.905 | 21.9 | 25.2 | 19.8 | 0.905 | 27.7 | 20.1 | 25.7 | 0.905 | 25.3 | 0.0 | 11.5 |

---

All age (D)

| Men | Women | Both sexes combines |
|-----|-------|---------------------|
|-----|-------|---------------------|

| Year | SDI   | Obesity (%) | Current smoker (%) | Current alcohol drinker (%) | SDI   | Obesity (%) | Current smoker (%) | Current alcohol drinker (%) | SDI   | Obesity (%) | Current smoker (%) | Current alcohol drinker (%) |
|------|-------|-------------|--------------------|-----------------------------|-------|-------------|--------------------|-----------------------------|-------|-------------|--------------------|-----------------------------|
| 2017 | 0.865 | 31.6        | 28.5               | 34.0                        | 0.865 | 20.6        | 7.7                | 7.4                         | 0.865 | 25.2        | 17.5               | 19.8                        |
| 2018 | 0.867 | 31.9        | 27.6               | 34.0                        | 0.867 | 20.6        | 7.8                | 7.4                         | 0.867 | 25.2        | 17.1               | 19.8                        |
| 2019 | 0.868 | 32.2        | 26.8               | 34.0                        | 0.868 | 20.6        | 7.7                | 7.4                         | 0.868 | 25.2        | 16.7               | 19.8                        |
| 2020 | 0.870 | 32.5        | 25.9               | 34.0                        | 0.870 | 20.6        | 7.8                | 7.4                         | 0.870 | 25.2        | 16.4               | 19.8                        |
| 2021 | 0.872 | 32.9        | 25.1               | 34.0                        | 0.872 | 20.6        | 7.7                | 7.4                         | 0.872 | 25.2        | 16.0               | 19.8                        |
| 2022 | 0.874 | 33.2        | 24.2               | 34.0                        | 0.874 | 20.6        | 7.7                | 7.4                         | 0.874 | 25.2        | 15.6               | 19.8                        |
| 2023 | 0.875 | 33.5        | 23.4               | 34.0                        | 0.875 | 20.6        | 7.7                | 7.4                         | 0.875 | 25.2        | 15.2               | 19.8                        |
| 2024 | 0.877 | 33.8        | 22.5               | 34.0                        | 0.877 | 20.6        | 7.7                | 7.4                         | 0.877 | 25.2        | 14.9               | 19.8                        |
| 2025 | 0.879 | 34.1        | 21.7               | 34.0                        | 0.879 | 20.6        | 7.7                | 7.4                         | 0.879 | 25.2        | 14.5               | 19.8                        |
| 2026 | 0.881 | 34.5        | 20.8               | 34.0                        | 0.881 | 20.6        | 7.7                | 7.4                         | 0.881 | 25.2        | 14.1               | 19.8                        |
| 2027 | 0.882 | 34.8        | 19.9               | 34.0                        | 0.882 | 20.6        | 7.7                | 7.4                         | 0.882 | 25.2        | 13.7               | 19.8                        |
| 2028 | 0.884 | 35.1        | 19.1               | 34.0                        | 0.884 | 20.6        | 7.7                | 7.4                         | 0.884 | 25.2        | 13.3               | 19.8                        |
| 2029 | 0.886 | 35.4        | 18.2               | 34.0                        | 0.886 | 20.6        | 7.7                | 7.4                         | 0.886 | 25.2        | 13.0               | 19.8                        |
| 2030 | 0.888 | 35.8        | 17.4               | 34.0                        | 0.888 | 20.6        | 7.7                | 7.4                         | 0.888 | 25.2        | 12.6               | 19.8                        |
| 2031 | 0.889 | 36.1        | 16.5               | 34.0                        | 0.889 | 20.6        | 7.7                | 7.4                         | 0.889 | 25.2        | 12.2               | 19.8                        |
| 2032 | 0.891 | 36.4        | 15.7               | 34.0                        | 0.891 | 20.6        | 7.7                | 7.4                         | 0.891 | 25.2        | 11.8               | 19.8                        |

|      |       |      |      |      |       |      |     |     |       |      |      |      |
|------|-------|------|------|------|-------|------|-----|-----|-------|------|------|------|
| 2033 | 0.893 | 36.7 | 14.8 | 34.0 | 0.893 | 20.6 | 7.7 | 7.4 | 0.893 | 25.2 | 11.5 | 19.8 |
| 2034 | 0.894 | 37.0 | 14.0 | 34.0 | 0.894 | 20.6 | 7.7 | 7.4 | 0.894 | 25.2 | 11.1 | 19.8 |
| 2035 | 0.896 | 37.4 | 13.1 | 34.0 | 0.896 | 20.6 | 7.7 | 7.4 | 0.896 | 25.2 | 10.7 | 19.8 |
| 2036 | 0.898 | 37.7 | 12.3 | 34.0 | 0.898 | 20.6 | 7.7 | 7.4 | 0.898 | 25.2 | 10.3 | 19.8 |
| 2037 | 0.900 | 38.0 | 11.4 | 34.0 | 0.900 | 20.6 | 7.7 | 7.4 | 0.900 | 25.2 | 9.9  | 19.8 |
| 2038 | 0.901 | 38.3 | 10.5 | 34.0 | 0.901 | 20.6 | 7.7 | 7.4 | 0.901 | 25.2 | 9.6  | 19.8 |
| 2039 | 0.903 | 38.6 | 9.7  | 34.0 | 0.903 | 20.6 | 7.7 | 7.4 | 0.903 | 25.2 | 9.2  | 19.8 |
| 2040 | 0.905 | 39.0 | 8.8  | 34.0 | 0.905 | 20.6 | 7.7 | 7.4 | 0.905 | 25.2 | 8.8  | 19.8 |

60 SDI: socio-demographic index

61 **Supplemental Table 3: Estimated sets of parameters in ARIMA (p,d,q) and Akaike Information Criteria (AIC).**

| Disease                 | Age group              | Sex                 | p                   | d | q | AIC    |        |
|-------------------------|------------------------|---------------------|---------------------|---|---|--------|--------|
| Cardiovascular diseases | 20–49                  | Men                 | 1                   | 0 | 0 | -130.7 |        |
|                         |                        | Women               | 9                   | 0 | 0 | -138.1 |        |
|                         |                        | Both sexes combined | 7                   | 0 | 0 | -141.0 |        |
|                         | 50–69                  | Men                 | 7                   | 0 | 0 | -144.3 |        |
|                         |                        | Women               | 4                   | 0 | 0 | -152.8 |        |
|                         |                        | Both sexes combined | 3                   | 0 | 8 | -159.1 |        |
|                         | ≥70                    | Men                 | 5                   | 0 | 1 | -126.3 |        |
|                         |                        | Women               | 9                   | 0 | 0 | -140.2 |        |
|                         |                        | Both sexes combined | 4                   | 0 | 0 | -137.0 |        |
|                         | All ages               | Men                 | 0                   | 0 | 0 | -150.5 |        |
|                         |                        | Women               | 6                   | 0 | 3 | -146.6 |        |
|                         |                        | Both sexes combined | 4                   | 0 | 3 | -157.4 |        |
|                         | Chronic kidney disease | 20–49               | Men                 | 9 | 0 | 0      | -153.6 |
|                         |                        |                     | Women               | 5 | 0 | 0      | -158.0 |
|                         |                        |                     | Both sexes combined | 7 | 0 | 0      | -159.6 |
| 50–69                   |                        | Men                 | 4                   | 0 | 5 | -144.4 |        |
|                         |                        | Women               | 4                   | 0 | 0 | -175.7 |        |
|                         |                        | Both sexes combined | 5                   | 0 | 3 | -172.1 |        |
| ≥70                     |                        | Men                 | 7                   | 0 | 0 | -137.7 |        |
|                         |                        | Women               | 6                   | 0 | 0 | -150.6 |        |
|                         |                        | Both sexes combined | 4                   | 0 | 0 | -154.2 |        |
| All ages                |                        | Men                 | 3                   | 0 | 0 | -141.6 |        |
|                         |                        | Women               | 1                   | 0 | 0 | -156.1 |        |
|                         |                        | Both sexes combined | 7                   | 0 | 0 | -150.4 |        |
| 20–49                   |                        | Men                 | 6                   | 0 | 6 | -128.8 |        |



|                   |                     |                     |   |   |        |        |
|-------------------|---------------------|---------------------|---|---|--------|--------|
| Stomach<br>cancer |                     | Women               | 4 | 0 | 3      | -137.5 |
|                   |                     | Both sexes combined | 9 | 0 | 2      | -143.9 |
|                   |                     | Men                 | 0 | 0 | 0      | -128.9 |
|                   | 50–69               | Women               | 8 | 0 | 0      | -148.2 |
|                   |                     | Both sexes combined | 7 | 0 | 9      | -149.8 |
|                   |                     | Men                 | 9 | 0 | 0      | -124.5 |
|                   | ≥70                 | Women               | 9 | 0 | 0      | -144.4 |
|                   |                     | Both sexes combined | 9 | 0 | 7      | -140.4 |
|                   |                     | Men                 | 1 | 0 | 0      | -134.1 |
|                   | All ages            | Women               | 5 | 0 | 0      | -174.1 |
|                   | Both sexes combined | 8                   | 0 | 0 | -151.6 |        |

63 **Supplementary Table 4: Predicted DALY rates (95% prediction intervals) for cardiovascular diseases (1), chronic kidney diseases (2), and stomach cancer (3) by**  
 64 **age groups for men (A), women (B), and both sexes combined (C); and for all ages by sex (D), 2017–2040.**

| Cardiovascular disease (1) |                        |                        |                        |                        |
|----------------------------|------------------------|------------------------|------------------------|------------------------|
| Men (1–A)                  |                        |                        |                        |                        |
| 20–49                      |                        |                        |                        |                        |
| Year                       | Reference              | Scenario 1             | Scenario 2             | Scenario 3             |
| 2017                       | 1053.1 (1020.1–1087.2) | 1054.5 (1021.4–1088.5) | 1054.5 (1021.4–1088.5) | 1054.5 (1021.4–1088.5) |
| 2018                       | 1050.7 (1013.2–1089.7) | 1049.9 (1012.4–1088.8) | 1053.1 (1015.5–1092.1) | 1054.3 (1016.6–1093.3) |
| 2019                       | 1044.9 (1006.3–1085.0) | 1041.3 (1002.8–1081.2) | 1047.7 (1009.0–1087.9) | 1050.0 (1011.2–1090.3) |
| 2020                       | 1038.1 (999.4–1078.3)  | 1031.8 (993.3–1071.8)  | 1041.3 (1002.5–1081.7) | 1044.7 (1005.7–1085.2) |
| 2021                       | 1032.7 (994.0–1072.9)  | 1023.7 (985.4–1063.5)  | 1036.4 (997.6–1076.7)  | 1040.9 (1001.9–1081.3) |
| 2022                       | 1024.0 (985.7–1063.9)  | 1012.4 (974.5–1051.8)  | 1028.1 (989.6–1068.1)  | 1033.7 (994.9–1073.9)  |
| 2023                       | 1015.7 (977.6–1055.3)  | 1001.5 (964.0–1040.5)  | 1020.2 (981.9–1059.9)  | 1026.8 (988.4–1066.8)  |
| 2024                       | 1008.6 (970.8–1047.9)  | 994.2 (956.9–1032.9)   | 1013.5 (975.5–1052.9)  | 1021.2 (982.9–1061.0)  |
| 2025                       | 1000.9 (963.4–1039.9)  | 986.3 (949.3–1024.7)   | 1006.2 (968.5–1045.4)  | 1014.9 (976.9–1054.5)  |
| 2026                       | 993.0 (955.7–1031.6)   | 978.1 (941.4–1016.2)   | 998.6 (961.2–1037.5)   | 1008.4 (970.6–1047.7)  |
| 2027                       | 986.4 (949.4–1024.8)   | 971.3 (934.9–1009.2)   | 992.4 (955.2–1031.1)   | 1003.3 (965.7–1042.3)  |
| 2028                       | 978.1 (941.4–1016.2)   | 962.8 (926.7–1000.3)   | 984.5 (947.6–1022.8)   | 996.3 (959.0–1035.1)   |

|      |                      |                     |                      |                      |
|------|----------------------|---------------------|----------------------|----------------------|
| 2029 | 969.8 (933.4–1007.6) | 954.3 (918.6–991.5) | 976.5 (939.9–1014.6) | 989.3 (952.3–1027.9) |
| 2030 | 963.2 (927.1–1000.7) | 947.5 (912.0–984.4) | 970.3 (933.9–1008.1) | 984.1 (947.2–1022.4) |
| 2031 | 955.5 (919.7–992.7)  | 939.7 (904.5–976.3) | 963.0 (926.9–1000.5) | 977.8 (941.1–1015.8) |
| 2032 | 947.6 (912.1–984.5)  | 931.6 (896.7–967.9) | 955.4 (919.6–992.7)  | 971.1 (934.7–1009.0) |
| 2033 | 940.7 (905.4–977.3)  | 924.5 (889.8–960.5) | 948.8 (913.3–985.8)  | 965.5 (929.3–1003.1) |
| 2034 | 932.7 (897.7–969.0)  | 916.3 (882.0–952.0) | 941.2 (905.9–977.9)  | 958.7 (922.8–996.1)  |
| 2035 | 924.9 (890.3–960.9)  | 908.4 (874.3–943.7) | 933.7 (898.7–970.1)  | 952.2 (916.5–989.3)  |
| 2036 | 918.6 (884.2–954.4)  | 901.9 (868.1–937.0) | 927.8 (893.0–963.9)  | 947.1 (911.6–984.0)  |
| 2037 | 911.2 (877.1–946.7)  | 894.3 (860.8–929.2) | 920.7 (886.2–956.6)  | 940.9 (905.7–977.6)  |
| 2038 | 903.7 (869.8–938.9)  | 886.6 (853.4–921.1) | 913.5 (879.2–949.0)  | 934.5 (899.5–970.9)  |
| 2039 | 897.1 (863.5–932.0)  | 879.9 (846.9–914.2) | 907.2 (873.2–942.5)  | 929.1 (894.3–965.3)  |
| 2040 | 889.8 (856.5–924.5)  | 872.5 (839.8–906.4) | 900.2 (866.5–935.3)  | 923.0 (888.4–959.0)  |

---

50–69

| Year | Reference              | Scenario 1             | Scenario 2             | Scenario 3             |
|------|------------------------|------------------------|------------------------|------------------------|
| 2017 | 5689.8 (5575.9–5805.9) | 5696.0 (5582.0–5812.3) | 5696.0 (5582.0–5812.3) | 5696.0 (5582.0–5812.3) |
| 2018 | 5545.9 (5400.7–5695.0) | 5540.3 (5395.2–5689.2) | 5551.2 (5405.9–5700.4) | 5555.0 (5409.6–5704.4) |
| 2019 | 5474.1 (5332.1–5619.9) | 5457.0 (5315.4–5602.3) | 5478.5 (5336.4–5624.4) | 5486.1 (5343.8–5632.2) |

|      |                        |                        |                        |                        |
|------|------------------------|------------------------|------------------------|------------------------|
| 2020 | 5488.7 (5344.9–5636.3) | 5460.0 (5317.0–5606.9) | 5492.3 (5348.4–5640.0) | 5503.7 (5359.6–5651.8) |
| 2021 | 5427.7 (5283.9–5575.5) | 5388.0 (5245.2–5534.6) | 5430.5 (5286.6–5578.3) | 5445.6 (5301.3–5593.8) |
| 2022 | 5421.2 (5270.6–5576.2) | 5370.2 (5220.9–5523.7) | 5423.2 (5272.5–5578.2) | 5442.0 (5290.8–5597.6) |
| 2023 | 5430.2 (5278.5–5586.2) | 5367.7 (5217.8–5522.0) | 5431.4 (5279.6–5587.5) | 5454.0 (5301.6–5610.8) |
| 2024 | 5333.2 (5181.9–5489.0) | 5270.2 (5120.6–5424.1) | 5333.6 (5182.2–5489.4) | 5359.6 (5207.4–5516.1) |
| 2025 | 5241.0 (5073.0–5414.6) | 5177.3 (5011.4–5348.8) | 5240.6 (5072.6–5414.2) | 5269.8 (5100.8–5444.3) |
| 2026 | 5202.4 (5032.6–5377.9) | 5137.5 (4969.9–5310.8) | 5201.2 (5031.5–5376.7) | 5233.8 (5063.0–5410.4) |
| 2027 | 5072.9 (4908.3–5243.0) | 5008.0 (4845.5–5175.9) | 5071.0 (4906.5–5241.0) | 5106.3 (4940.6–5277.5) |
| 2028 | 4946.1 (4784.1–5113.5) | 4881.2 (4721.4–5046.4) | 4943.5 (4781.7–5110.8) | 4981.4 (4818.3–5150.0) |
| 2029 | 4869.9 (4707.3–5038.0) | 4804.5 (4644.1–4970.4) | 4866.6 (4704.2–5034.7) | 4907.3 (4743.5–5076.8) |
| 2030 | 4744.1 (4577.3–4917.1) | 4678.9 (4514.3–4849.4) | 4740.3 (4573.6–4913.1) | 4783.2 (4615.0–4957.6) |
| 2031 | 4630.8 (4467.3–4800.3) | 4565.6 (4404.4–4732.7) | 4626.4 (4463.1–4795.7) | 4671.5 (4506.6–4842.5) |
| 2032 | 4603.9 (4439.2–4774.7) | 4537.7 (4375.3–4706.0) | 4598.9 (4434.4–4769.5) | 4646.9 (4480.7–4819.3) |
| 2033 | 4546.3 (4375.3–4723.9) | 4479.4 (4311.0–4654.4) | 4540.6 (4369.9–4718.0) | 4591.3 (4418.7–4770.7) |
| 2034 | 4484.7 (4318.0–4657.8) | 4417.3 (4253.1–4587.8) | 4478.5 (4312.0–4651.3) | 4531.6 (4363.2–4706.5) |
| 2035 | 4485.3 (4318.9–4658.1) | 4416.5 (4252.6–4586.6) | 4478.4 (4312.3–4650.9) | 4534.7 (4366.5–4709.4) |
| 2036 | 4455.4 (4289.2–4628.1) | 4385.6 (4222.0–4555.5) | 4447.9 (4282.0–4620.3) | 4506.9 (4338.8–4681.6) |
| 2037 | 4394.5 (4227.3–4568.3) | 4324.2 (4159.7–4495.2) | 4386.4 (4219.5–4559.9) | 4447.7 (4278.5–4623.6) |
| 2038 | 4381.0 (4207.7–4561.5) | 4309.6 (4139.1–4487.1) | 4372.4 (4199.4–4552.5) | 4436.5 (4261.0–4619.3) |

|      |                        |                        |                        |                        |
|------|------------------------|------------------------|------------------------|------------------------|
| 2039 | 4329.7 (4158.3–4508.1) | 4257.7 (4089.2–4433.1) | 4320.5 (4149.5–4498.5) | 4386.9 (4213.3–4567.7) |
| 2040 | 4230.2 (4060.6–4406.9) | 4158.5 (3991.8–4332.2) | 4220.6 (4051.4–4396.9) | 4288.5 (4116.5–4467.6) |

| ≥70  |                           |                           |                           |                           |
|------|---------------------------|---------------------------|---------------------------|---------------------------|
| Year | Reference                 | Scenario 1                | Scenario 2                | Scenario 3                |
| 2017 | 15482.5 (15045.4–15932.4) | 15463.0 (15026.4–15912.3) | 15463.0 (15026.4–15912.3) | 15463.0 (15026.4–15912.3) |
| 2018 | 15022.2 (14401.7–15669.5) | 15089.1 (14465.9–15739.3) | 15018.6 (14398.3–15665.7) | 14993.8 (14374.5–15639.8) |
| 2019 | 14721.0 (14073.9–15397.9) | 14871.3 (14217.5–15555.0) | 14732.6 (14085.0–15410.0) | 14683.9 (14038.5–15359.1) |
| 2020 | 14378.6 (13600.9–15200.8) | 14608.4 (13818.3–15443.8) | 14404.6 (13625.4–15228.2) | 14333.3 (13558.0–15152.9) |
| 2021 | 13843.9 (12958.2–14790.2) | 14145.7 (13240.7–15112.6) | 13883.1 (12994.8–14832.1) | 13791.6 (12909.2–14734.3) |
| 2022 | 13443.7 (12565.2–14383.6) | 13815.4 (12912.6–14781.3) | 13495.6 (12613.7–14439.1) | 13384.5 (12509.9–14320.2) |
| 2023 | 13111.6 (12244.1–14040.6) | 13551.2 (12654.6–14511.4) | 13175.7 (12303.9–14109.2) | 13045.6 (12182.4–13969.9) |
| 2024 | 12655.5 (11797.2–13576.2) | 13103.0 (12214.4–14056.3) | 12730.3 (11867.0–13656.5) | 12583.8 (11730.4–13499.4) |
| 2025 | 12262.3 (11436.5–13147.7) | 12718.3 (11861.8–13636.7) | 12347.4 (11515.9–13239.0) | 12185.1 (11364.5–13065.0) |
| 2026 | 12004.8 (11180.5–12889.8) | 12473.2 (11616.8–13392.8) | 12100.5 (11269.7–12992.5) | 11921.7 (11103.2–12800.6) |
| 2027 | 11688.3 (10875.5–12561.9) | 12165.9 (11319.9–13075.2) | 11793.5 (10973.4–12675.0) | 11600.1 (10793.4–12467.1) |
| 2028 | 11381.6 (10555.3–12272.7) | 11867.6 (11006.0–12796.7) | 11495.9 (10661.2–12395.8) | 11288.7 (10469.1–12172.4) |
| 2029 | 11165.5 (10290.7–12114.7) | 11662.9 (10749.1–12654.3) | 11289.1 (10404.6–12248.8) | 11067.3 (10200.2–12008.1) |

|      |                           |                           |                           |                          |
|------|---------------------------|---------------------------|---------------------------|--------------------------|
| 2030 | 10944.6 (10055.7–11912.2) | 11452.4 (10522.2–12464.8) | 11077.1 (10177.4–12056.3) | 10841.5 (9961.0–11800.0) |
| 2031 | 10684.4 (9793.1–11656.9)  | 11199.9 (10265.5–12219.2) | 10824.8 (9921.8–11810.1)  | 10577.1 (9694.7–11539.8) |
| 2032 | 10505.1 (9596.7–11499.6)  | 11031.4 (10077.4–12075.7) | 10654.0 (9732.7–11662.6)  | 10393.1 (9494.3–11376.9) |
| 2033 | 10340.4 (9436.2–11331.2)  | 10877.6 (9926.4–11919.8)  | 10497.7 (9579.7–11503.5)  | 10223.6 (9329.6–11203.2) |
| 2034 | 10113.2 (9232.5–11077.8)  | 10657.4 (9729.3–11674.0)  | 10277.5 (9382.5–11257.9)  | 9992.6 (9122.5–10945.8)  |
| 2035 | 9906.8 (9044.1–10851.8)   | 10458.4 (9547.6–11456.0)  | 10078.1 (9200.5–11039.4)  | 9782.6 (8930.7–10715.7)  |
| 2036 | 9724.1 (8875.7–10653.6)   | 10283.7 (9386.5–11266.7)  | 9902.4 (9038.4–10848.9)   | 9596.1 (8758.9–10513.4)  |
| 2037 | 9479.6 (8637.3–10404.1)   | 10042.8 (9150.5–11022.2)  | 9663.3 (8804.6–10605.6)   | 9348.9 (8518.3–10260.6)  |
| 2038 | 9221.1 (8385.0–10140.5)   | 9786.2 (8898.8–10762.0)   | 9409.3 (8556.2–10347.6)   | 9088.2 (8264.2–9994.4)   |
| 2039 | 8989.0 (8158.3–9904.3)    | 9556.8 (8673.6–10529.9)   | 9181.9 (8333.4–10116.8)   | 8853.9 (8035.7–9755.5)   |
| 2040 | 8725.5 (7894.4–9644.1)    | 9293.0 (8407.8–10271.4)   | 8921.9 (8072.0–9861.2)    | 8588.9 (7770.8–9493.2)   |

---

Women (1–B)

---

20–49

---

| Year | Reference           | Scenario 1          | Scenario 2          | Scenario 3          |
|------|---------------------|---------------------|---------------------|---------------------|
| 2017 | 495.1 (481.6–508.9) | 497.3 (483.7–511.2) | 497.3 (483.7–511.2) | 497.3 (483.7–511.2) |
| 2018 | 471.7 (455.8–488.1) | 474.1 (458.1–490.6) | 474.6 (458.6–491.1) | 474.8 (458.8–491.3) |
| 2019 | 465.6 (448.7–483.1) | 468.3 (451.3–485.9) | 469.4 (452.3–487.0) | 469.7 (452.7–487.4) |

|      |                     |                     |                     |                     |
|------|---------------------|---------------------|---------------------|---------------------|
| 2020 | 454.6 (435.0–475.0) | 457.5 (437.8–478.1) | 459.1 (439.3–479.7) | 459.6 (439.9–480.3) |
| 2021 | 443.3 (424.6–462.9) | 446.5 (427.6–466.2) | 448.5 (429.5–468.3) | 449.2 (430.2–469.1) |
| 2022 | 446.2 (427.2–466.1) | 449.7 (430.5–469.7) | 452.3 (433.0–472.4) | 453.2 (433.8–473.3) |
| 2023 | 439.9 (420.6–460.1) | 443.6 (424.2–464.0) | 446.7 (427.1–467.2) | 447.8 (428.1–468.3) |
| 2024 | 434.6 (415.7–454.3) | 438.0 (419.0–457.8) | 442.1 (422.9–462.1) | 443.3 (424.1–463.4) |
| 2025 | 433.0 (414.0–452.8) | 436.0 (417.0–456.0) | 441.2 (421.9–461.4) | 442.6 (423.3–462.9) |
| 2026 | 426.8 (407.9–446.5) | 429.5 (410.5–449.3) | 435.7 (416.5–455.8) | 437.3 (418.0–457.5) |
| 2027 | 428.2 (407.1–450.4) | 430.6 (409.4–452.9) | 437.9 (416.3–460.6) | 439.7 (418.0–462.5) |
| 2028 | 429.3 (406.9–452.9) | 431.4 (408.9–455.1) | 439.8 (416.9–464.0) | 441.8 (418.8–466.1) |
| 2029 | 428.3 (405.3–452.6) | 430.1 (407.0–454.5) | 439.7 (416.0–464.6) | 441.8 (418.1–466.8) |
| 2030 | 429.0 (405.4–454.0) | 430.5 (406.9–455.6) | 441.2 (416.9–466.8) | 443.5 (419.1–469.3) |
| 2031 | 422.1 (398.9–446.6) | 423.3 (400.0–447.9) | 434.8 (410.9–460.1) | 437.3 (413.3–462.6) |
| 2032 | 416.7 (393.8–441.0) | 417.6 (394.6–441.9) | 430.1 (406.4–455.1) | 432.7 (408.9–457.9) |
| 2033 | 412.5 (389.9–436.5) | 413.1 (390.5–437.1) | 426.5 (403.1–451.3) | 429.3 (405.7–454.2) |
| 2034 | 404.3 (382.0–427.8) | 404.6 (382.3–428.2) | 418.7 (395.7–443.1) | 421.6 (398.4–446.2) |
| 2035 | 400.7 (378.6–424.2) | 400.8 (378.6–424.2) | 415.8 (392.8–440.2) | 418.8 (395.7–443.4) |
| 2036 | 393.9 (371.5–417.8) | 393.7 (371.2–417.5) | 409.5 (386.1–434.3) | 412.6 (389.1–437.6) |
| 2037 | 383.7 (361.1–407.7) | 383.2 (360.6–407.1) | 399.6 (376.1–424.5) | 402.8 (379.1–428.0) |
| 2038 | 377.8 (355.1–402.0) | 377.0 (354.3–401.1) | 394.1 (370.4–419.4) | 397.5 (373.6–422.9) |

|      |                     |                     |                     |                     |
|------|---------------------|---------------------|---------------------|---------------------|
| 2039 | 369.4 (346.6–393.6) | 368.3 (345.7–392.5) | 386.0 (362.3–411.4) | 389.5 (365.5–415.0) |
| 2040 | 363.2 (340.9–387.1) | 362.0 (339.7–385.7) | 380.3 (356.9–405.3) | 383.9 (360.2–409.1) |

| 50–69 |                        |                        |                        |                        |
|-------|------------------------|------------------------|------------------------|------------------------|
| Year  | Reference              | Scenario 1             | Scenario 2             | Scenario 3             |
| 2017  | 2552.8 (2501.8–2604.9) | 2559.0 (2507.9–2611.2) | 2559.0 (2507.9–2611.2) | 2559.0 (2507.9–2611.2) |
| 2018  | 2477.8 (2413.1–2544.2) | 2478.7 (2413.9–2545.2) | 2484.7 (2419.8–2551.3) | 2486.8 (2421.9–2553.5) |
| 2019  | 2418.8 (2349.3–2490.4) | 2414.7 (2345.3–2486.1) | 2426.4 (2356.7–2498.2) | 2430.6 (2360.8–2502.5) |
| 2020  | 2390.1 (2300.1–2483.6) | 2381.1 (2291.4–2474.3) | 2398.5 (2308.1–2492.3) | 2404.6 (2314.1–2498.7) |
| 2021  | 2317.1 (2221.6–2416.7) | 2303.6 (2208.6–2402.6) | 2326.0 (2230.1–2426.0) | 2334.0 (2237.8–2434.3) |
| 2022  | 2263.3 (2168.9–2361.8) | 2245.5 (2151.8–2343.2) | 2272.9 (2178.0–2371.8) | 2282.6 (2187.4–2382.0) |
| 2023  | 2226.5 (2128.9–2328.5) | 2204.4 (2107.8–2305.4) | 2236.7 (2138.7–2339.2) | 2248.2 (2149.7–2351.2) |
| 2024  | 2171.8 (2076.4–2271.7) | 2148.0 (2053.6–2246.8) | 2182.5 (2086.6–2282.9) | 2195.7 (2099.2–2296.6) |
| 2025  | 2123.6 (2030.3–2221.3) | 2098.2 (2006.0–2194.6) | 2134.9 (2041.0–2233.0) | 2149.5 (2055.1–2248.4) |
| 2026  | 2096.6 (2004.4–2193.0) | 2069.3 (1978.3–2164.5) | 2108.4 (2015.7–2205.4) | 2124.7 (2031.3–2222.5) |
| 2027  | 2055.9 (1964.3–2151.9) | 2027.1 (1936.7–2121.7) | 2068.3 (1976.1–2164.8) | 2086.1 (1993.1–2183.4) |
| 2028  | 2021.1 (1926.6–2120.3) | 1990.7 (1897.6–2088.3) | 2034.0 (1938.9–2133.8) | 2053.2 (1957.2–2154.0) |
| 2029  | 2000.7 (1905.1–2101.1) | 1968.5 (1874.5–2067.3) | 2014.2 (1917.9–2115.3) | 2035.0 (1937.7–2137.1) |



|      |                        |                        |                        |                        |
|------|------------------------|------------------------|------------------------|------------------------|
| 2030 | 1970.0 (1873.3–2071.7) | 1936.3 (1841.2–2036.2) | 1984.0 (1886.6–2086.4) | 2006.1 (1907.7–2109.7) |
| 2031 | 1943.9 (1844.8–2048.4) | 1908.7 (1811.4–2011.2) | 1958.4 (1858.6–2063.6) | 1982.0 (1881.0–2088.5) |
| 2032 | 1921.7 (1822.9–2025.9) | 1884.9 (1788.0–1987.1) | 1936.7 (1837.1–2041.8) | 1961.8 (1860.9–2068.1) |
| 2033 | 1894.7 (1796.8–1997.9) | 1856.4 (1760.5–1957.6) | 1910.1 (1811.4–2014.2) | 1936.5 (1836.4–2042.0) |
| 2034 | 1864.6 (1767.8–1966.8) | 1825.1 (1730.3–1925.1) | 1880.5 (1782.9–1983.5) | 1908.1 (1809.0–2012.6) |
| 2035 | 1838.6 (1743.3–1939.2) | 1797.8 (1704.6–1896.1) | 1855.0 (1758.8–1956.4) | 1883.8 (1786.1–1986.8) |
| 2036 | 1804.9 (1711.0–1903.8) | 1762.9 (1671.3–1859.6) | 1821.5 (1726.8–1921.4) | 1851.4 (1755.1–1952.9) |
| 2037 | 1771.5 (1679.1–1868.9) | 1728.5 (1638.4–1823.6) | 1788.5 (1695.3–1886.8) | 1819.4 (1724.5–1919.4) |
| 2038 | 1738.8 (1647.2–1835.5) | 1694.9 (1605.6–1789.2) | 1756.1 (1663.6–1853.8) | 1788.0 (1693.8–1887.4) |
| 2039 | 1701.9 (1611.0–1797.9) | 1657.2 (1568.7–1750.7) | 1719.4 (1627.6–1816.4) | 1752.1 (1658.5–1850.9) |
| 2040 | 1667.8 (1578.0–1762.6) | 1622.3 (1535.0–1714.6) | 1685.6 (1594.9–1781.5) | 1719.1 (1626.6–1816.9) |

≥70

| Year | Reference                 | Scenario 1                | Scenario 2                | Scenario 3                |
|------|---------------------------|---------------------------|---------------------------|---------------------------|
| 2017 | 11358.6 (11074.4–11650.2) | 11366.0 (11081.5–11657.7) | 11366.0 (11081.5–11657.7) | 11366.0 (11081.5–11657.7) |
| 2018 | 11110.7 (10717.0–11518.8) | 11098.4 (10705.1–11506.1) | 11115.4 (10721.6–11523.7) | 11121.4 (10727.4–11529.9) |
| 2019 | 10851.5 (10371.4–11353.8) | 10820.5 (10341.8–11321.4) | 10853.7 (10373.5–11356.1) | 10865.5 (10384.8–11368.4) |
| 2020 | 10413.8 (9809.1–11055.7)  | 10365.9 (9764.0–11004.8)  | 10413.6 (9809.0–11055.5)  | 10430.6 (9824.9–11073.5)  |

|      |                          |                         |                          |                          |
|------|--------------------------|-------------------------|--------------------------|--------------------------|
| 2021 | 10061.4 (9443.2–10720.0) | 9997.5 (9383.3–10652.0) | 10059.0 (9441.0–10717.5) | 10080.8 (9461.4–10740.8) |
| 2022 | 9824.2 (9200.0–10490.7)  | 9744.8 (9125.6–10405.9) | 9819.8 (9195.9–10486.0)  | 9846.4 (9220.8–10514.4)  |
| 2023 | 9575.8 (8931.4–10266.6)  | 9481.7 (8843.7–10165.8) | 9569.4 (8925.4–10259.7)  | 9600.5 (8954.5–10293.1)  |
| 2024 | 9418.4 (8780.7–10102.4)  | 9314.7 (8684.0–9991.2)  | 9410.0 (8772.9–10093.5)  | 9445.7 (8806.2–10131.8)  |
| 2025 | 9086.6 (8463.5–9755.6)   | 8975.8 (8360.3–9636.6)  | 9076.6 (8454.2–9744.8)   | 9116.0 (8490.8–9787.1)   |
| 2026 | 8761.2 (8158.2–9408.8)   | 8644.0 (8049.0–9282.9)  | 8749.6 (8147.4–9396.3)   | 8792.3 (8187.2–9442.2)   |
| 2027 | 8530.2 (7936.8–9167.9)   | 8405.9 (7821.1–9034.4)  | 8517.0 (7924.5–9153.8)   | 8563.2 (7967.5–9203.4)   |
| 2028 | 8245.2 (7656.9–8878.7)   | 8115.3 (7536.2–8738.9)  | 8230.7 (7643.4–8863.1)   | 8279.8 (7689.0–8916.0)   |
| 2029 | 8170.8 (7558.7–8832.4)   | 8032.4 (7430.7–8682.8)  | 8154.6 (7543.7–8814.9)   | 8207.7 (7592.8–8872.3)   |
| 2030 | 8112.8 (7479.9–8799.3)   | 7965.8 (7344.4–8639.8)  | 8095.0 (7463.5–8779.9)   | 8152.1 (7516.2–8841.9)   |
| 2031 | 7950.3 (7310.4–8646.2)   | 7796.8 (7169.3–8479.3)  | 7931.0 (7292.7–8625.2)   | 7991.3 (7348.1–8690.8)   |
| 2032 | 7879.5 (7227.9–8589.8)   | 7718.1 (7079.9–8413.9)  | 7858.7 (7208.9–8567.1)   | 7922.7 (7267.6–8636.9)   |
| 2033 | 7699.2 (7055.4–8401.7)   | 7532.5 (6902.6–8219.7)  | 7677.2 (7035.3–8377.7)   | 7743.9 (7096.4–8450.5)   |
| 2034 | 7541.9 (6897.8–8246.1)   | 7369.7 (6740.3–8057.8)  | 7518.7 (6876.6–8220.8)   | 7588.2 (6940.1–8296.7)   |
| 2035 | 7503.6 (6857.0–8211.1)   | 7323.5 (6692.5–8014.0)  | 7478.9 (6834.5–8184.0)   | 7552.1 (6901.4–8264.1)   |
| 2036 | 7404.9 (6766.6–8103.5)   | 7218.5 (6596.2–7899.5)  | 7378.9 (6742.8–8075.1)   | 7455.2 (6812.5–8158.5)   |
| 2037 | 7347.3 (6714.1–8040.3)   | 7153.7 (6537.2–7828.4)  | 7319.9 (6689.1–8010.3)   | 7399.6 (6761.9–8097.4)   |
| 2038 | 7230.7 (6601.1–7920.3)   | 7031.7 (6419.5–7702.4)  | 7202.2 (6575.1–7889.1)   | 7284.5 (6650.2–7979.2)   |
| 2039 | 7026.8 (6401.9–7712.7)   | 6825.2 (6218.3–7491.5)  | 6997.5 (6375.2–7680.6)   | 7081.3 (6451.6–7772.5)   |

2040      6858.5 (6240.5–7537.6)                      6653.7 (6054.2–7312.6)                      6828.4 (6213.2–7504.6)                      6913.9 (6291.0–7598.6)

| Both sexes combined (2–C) |                     |                     |                     |                     |
|---------------------------|---------------------|---------------------|---------------------|---------------------|
| 20–49                     |                     |                     |                     |                     |
| Year                      | Reference           | Scenario 1          | Scenario 2          | Scenario 3          |
| 2017                      | 760.0 (742.2–778.1) | 762.2 (744.5–780.4) | 762.2 (744.5–780.4) | 762.2 (744.5–780.4) |
| 2018                      | 747.5 (726.9–768.7) | 748.9 (728.2–770.1) | 750.4 (729.7–771.7) | 751.0 (730.2–772.3) |
| 2019                      | 750.5 (728.4–773.2) | 751.1 (729.0–773.8) | 754.1 (731.9–777.0) | 755.2 (733.0–778.1) |
| 2020                      | 744.9 (722.0–768.6) | 744.7 (721.8–768.3) | 749.2 (726.2–773.0) | 750.8 (727.7–774.7) |
| 2021                      | 738.9 (716.5–762.0) | 737.8 (715.4–760.9) | 743.8 (721.2–767.1) | 745.9 (723.3–769.3) |
| 2022                      | 745.4 (721.9–769.8) | 743.5 (720.0–767.8) | 751.1 (727.3–775.6) | 753.8 (729.9–778.3) |
| 2023                      | 739.4 (715.8–763.8) | 736.7 (713.1–761.0) | 745.7 (721.8–770.3) | 748.9 (724.9–773.6) |
| 2024                      | 735.0 (710.6–760.2) | 732.0 (707.7–757.1) | 741.9 (717.3–767.3) | 745.6 (720.9–771.1) |
| 2025                      | 736.5 (710.6–763.4) | 733.2 (707.4–759.9) | 744.1 (717.9–771.2) | 748.4 (722.0–775.6) |
| 2026                      | 724.8 (699.3–751.2) | 721.2 (695.8–747.5) | 732.9 (707.1–759.6) | 737.6 (711.6–764.5) |
| 2027                      | 714.0 (687.6–741.3) | 710.1 (683.9–737.4) | 722.6 (695.9–750.3) | 727.8 (700.9–755.7) |
| 2028                      | 708.1 (681.9–735.3) | 704.0 (677.9–731.0) | 717.3 (690.7–744.8) | 722.9 (696.2–750.7) |
| 2029                      | 691.8 (665.9–718.7) | 687.5 (661.8–714.2) | 701.4 (675.1–728.7) | 707.4 (681.0–734.9) |

|      |                     |                     |                     |                     |
|------|---------------------|---------------------|---------------------|---------------------|
| 2030 | 681.1 (655.5–707.8) | 676.6 (651.1–703.1) | 691.2 (665.2–718.3) | 697.7 (671.4–725.0) |
| 2031 | 675.1 (649.1–702.1) | 670.4 (644.5–697.2) | 685.7 (659.3–713.2) | 692.6 (665.9–720.3) |
| 2032 | 662.4 (635.9–690.1) | 657.5 (631.1–684.9) | 673.4 (646.4–701.5) | 680.7 (653.4–709.1) |
| 2033 | 656.7 (630.4–684.0) | 651.5 (625.4–678.7) | 668.2 (641.5–696.0) | 675.9 (648.8–704.0) |
| 2034 | 654.7 (628.2–682.4) | 649.3 (623.0–676.7) | 666.8 (639.8–695.0) | 675.0 (647.6–703.5) |
| 2035 | 647.3 (620.7–675.1) | 641.7 (615.3–669.2) | 659.9 (632.7–688.2) | 668.4 (640.9–697.1) |
| 2036 | 646.5 (620.1–674.0) | 640.6 (614.4–667.9) | 659.6 (632.7–687.7) | 668.6 (641.3–697.1) |
| 2037 | 646.2 (619.7–673.8) | 640.1 (613.9–667.4) | 659.9 (632.9–688.1) | 669.4 (642.0–698.0) |
| 2038 | 639.8 (613.4–667.3) | 633.4 (607.3–660.7) | 653.9 (626.9–682.1) | 663.8 (636.4–692.4) |
| 2039 | 637.8 (610.7–666.0) | 631.2 (604.4–659.2) | 652.5 (624.7–681.4) | 662.8 (634.6–692.2) |
| 2040 | 633.7 (606.6–662.0) | 626.9 (600.1–654.9) | 648.9 (621.2–677.9) | 659.7 (631.5–689.1) |

---

50–69

| Year | Reference              | Scenario 1             | Scenario 2             | Scenario 3             |
|------|------------------------|------------------------|------------------------|------------------------|
| 2017 | 4210.7 (4139.1–4283.7) | 4218.9 (4147.0–4291.9) | 4218.9 (4147.0–4291.9) | 4218.9 (4147.0–4291.9) |
| 2018 | 4060.3 (3922.0–4203.4) | 4057.3 (3919.2–4200.3) | 4068.2 (3929.7–4211.6) | 4072.0 (3933.4–4215.6) |
| 2019 | 4003.3 (3858.0–4154.0) | 3989.7 (3844.9–4139.9) | 4011.2 (3865.6–4162.2) | 4018.8 (3872.9–4170.1) |
| 2020 | 4037.5 (3887.8–4193.1) | 4013.1 (3864.3–4167.7) | 4045.5 (3895.5–4201.4) | 4057.1 (3906.6–4213.3) |

|      |                        |                        |                        |                        |
|------|------------------------|------------------------|------------------------|------------------------|
| 2021 | 3885.6 (3736.9–4040.3) | 3851.8 (3704.4–4005.1) | 3893.4 (3744.4–4048.3) | 3908.2 (3758.6–4063.7) |
| 2022 | 3821.1 (3669.0–3979.4) | 3777.8 (3627.4–3934.3) | 3828.8 (3676.4–3987.5) | 3847.0 (3693.9–4006.4) |
| 2023 | 3860.0 (3699.6–4027.5) | 3806.1 (3647.9–3971.2) | 3867.9 (3707.1–4035.7) | 3889.9 (3728.2–4058.7) |
| 2024 | 3736.5 (3580.5–3899.3) | 3681.8 (3528.0–3842.2) | 3744.2 (3587.8–3907.3) | 3769.1 (3611.7–3933.3) |
| 2025 | 3665.7 (3510.4–3828.0) | 3609.5 (3456.6–3769.3) | 3673.3 (3517.6–3835.9) | 3701.3 (3544.4–3865.1) |
| 2026 | 3698.0 (3537.0–3866.3) | 3638.8 (3480.4–3804.4) | 3705.7 (3544.4–3874.4) | 3737.5 (3574.8–3907.6) |
| 2027 | 3592.6 (3435.2–3757.2) | 3532.6 (3377.9–3694.4) | 3600.2 (3442.5–3765.1) | 3634.4 (3475.2–3800.9) |
| 2028 | 3517.4 (3362.8–3679.1) | 3456.3 (3304.4–3615.2) | 3524.9 (3370.0–3687.0) | 3561.8 (3405.3–3725.6) |
| 2029 | 3542.7 (3384.0–3708.8) | 3478.7 (3322.9–3641.9) | 3550.3 (3391.3–3716.8) | 3590.9 (3430.0–3759.2) |
| 2030 | 3453.1 (3297.4–3616.0) | 3388.4 (3235.7–3548.3) | 3460.5 (3304.6–3623.8) | 3503.4 (3345.5–3668.7) |
| 2031 | 3375.8 (3223.7–3535.0) | 3310.2 (3161.1–3466.4) | 3383.1 (3230.7–3542.7) | 3428.3 (3273.9–3590.0) |
| 2032 | 3394.0 (3238.9–3556.5) | 3325.8 (3173.8–3485.0) | 3401.4 (3246.0–3564.3) | 3450.1 (3292.4–3615.3) |
| 2033 | 3317.9 (3165.5–3477.7) | 3249.0 (3099.8–3405.5) | 3325.3 (3172.5–3485.4) | 3376.1 (3221.0–3538.6) |
| 2034 | 3240.3 (3091.7–3396.1) | 3170.8 (3025.4–3323.2) | 3247.6 (3098.6–3403.6) | 3300.3 (3148.9–3458.9) |
| 2035 | 3251.7 (3100.9–3409.9) | 3179.8 (3032.3–3334.5) | 3259.0 (3107.8–3417.6) | 3315.0 (3161.3–3476.3) |
| 2036 | 3187.3 (3038.8–3343.0) | 3114.6 (2969.5–3266.7) | 3194.5 (3045.7–3350.5) | 3252.5 (3101.0–3411.4) |
| 2037 | 3110.7 (2966.1–3262.4) | 3037.7 (2896.4–3185.8) | 3117.8 (2972.8–3269.9) | 3177.4 (3029.7–3332.4) |
| 2038 | 3115.7 (2969.4–3269.1) | 3040.4 (2897.7–3190.2) | 3122.8 (2976.3–3276.6) | 3185.6 (3036.0–3342.5) |
| 2039 | 3061.0 (2916.9–3212.2) | 2985.0 (2844.5–3132.4) | 3068.1 (2923.7–3219.6) | 3132.7 (2985.2–3287.4) |

2040      2986.6 (2846.2–3133.9)                      2910.4 (2773.6–3054.0)                      2993.6 (2852.8–3141.3)                      3059.5 (2915.6–3210.4)

| ≥70  |                           |                           |                           |                           |
|------|---------------------------|---------------------------|---------------------------|---------------------------|
| Year | Reference                 | Scenario 1                | Scenario 2                | Scenario 3                |
| 2017 | 13117.0 (12768.0–13475.5) | 13118.3 (12769.2–13476.8) | 13118.3 (12769.2–13476.8) | 13118.3 (12769.2–13476.8) |
| 2018 | 12735.3 (12282.7–13204.6) | 12731.8 (12279.3–13201.0) | 12735.8 (12283.1–13205.1) | 12737.2 (12284.5–13206.6) |
| 2019 | 12621.2 (12117.4–13145.9) | 12613.1 (12109.6–13137.5) | 12620.9 (12117.1–13145.6) | 12623.6 (12119.8–13148.5) |
| 2020 | 12316.2 (11665.3–13003.3) | 12303.7 (11653.5–12990.2) | 12315.2 (11664.4–13002.3) | 12319.2 (11668.2–13006.5) |
| 2021 | 11893.2 (11192.1–12638.3) | 11876.8 (11176.6–12620.8) | 11891.5 (11190.5–12636.5) | 11896.7 (11195.4–12642.0) |
| 2022 | 11691.3 (10982.5–12445.9) | 11670.8 (10963.2–12424.1) | 11688.9 (10980.3–12443.4) | 11695.3 (10986.3–12450.2) |
| 2023 | 11380.3 (10646.5–12164.7) | 11356.2 (10623.9–12138.9) | 11377.3 (10643.7–12161.5) | 11384.8 (10650.6–12169.5) |
| 2024 | 10991.8 (10274.2–11759.5) | 10966.6 (10250.7–11732.6) | 10988.2 (10270.9–11755.7) | 10996.7 (10278.7–11764.7) |
| 2025 | 10777.3 (10077.0–11526.2) | 10750.8 (10052.2–11497.9) | 10773.2 (10073.2–11521.8) | 10782.6 (10082.0–11531.9) |
| 2026 | 10516.5 (9833.2–11247.3)  | 10488.9 (9807.3–11217.8)  | 10511.8 (9828.8–11242.3)  | 10522.2 (9838.5–11253.4)  |
| 2027 | 10206.7 (9539.1–10921.1)  | 10178.2 (9512.4–10890.6)  | 10201.6 (9534.3–10915.6)  | 10212.8 (9544.7–10927.6)  |
| 2028 | 10031.6 (9350.9–10761.9)  | 10001.8 (9323.2–10729.9)  | 10025.9 (9345.6–10755.8)  | 10038.0 (9356.9–10768.7)  |
| 2029 | 9840.9 (9156.2–10576.8)   | 9810.0 (9127.5–10543.6)   | 9834.7 (9150.5–10570.2)   | 9847.7 (9162.5–10584.0)   |
| 2030 | 9578.1 (8888.8–10321.0)   | 9546.5 (8859.4–10286.9)   | 9571.6 (8882.7–10313.9)   | 9585.2 (8895.4–10328.6)   |

|      |                         |                         |                         |                         |
|------|-------------------------|-------------------------|-------------------------|-------------------------|
| 2031 | 9412.4 (8702.1–10180.6) | 9379.7 (8671.8–10145.3) | 9405.3 (8695.6–10173.1) | 9419.8 (8708.9–10188.7) |
| 2032 | 9241.0 (8528.4–10013.2) | 9207.4 (8497.3–9976.7)  | 9233.6 (8521.5–10005.1) | 9248.8 (8535.5–10021.6) |
| 2033 | 9034.4 (8327.2–9801.6)  | 9000.0 (8295.4–9764.3)  | 9026.6 (8320.0–9793.2)  | 9042.4 (8334.5–9810.3)  |
| 2034 | 8888.0 (8182.8–9654.0)  | 8852.6 (8150.2–9615.6)  | 8879.8 (8175.2–9645.1)  | 8896.3 (8190.4–9663.0)  |
| 2035 | 8733.5 (8040.2–9486.6)  | 8697.3 (8006.8–9447.2)  | 8724.9 (8032.3–9477.2)  | 8742.1 (8048.1–9495.9)  |
| 2036 | 8541.5 (7863.8–9277.5)  | 8504.6 (7829.9–9237.4)  | 8532.5 (7855.6–9267.8)  | 8550.3 (7872.0–9287.0)  |
| 2037 | 8382.7 (7717.5–9105.2)  | 8345.1 (7682.9–9064.4)  | 8373.4 (7709.0–9095.2)  | 8391.8 (7725.9–9115.1)  |
| 2038 | 8214.3 (7558.8–8926.6)  | 8176.1 (7523.6–8885.1)  | 8204.7 (7550.0–8916.2)  | 8223.6 (7567.3–8936.7)  |
| 2039 | 8012.0 (7365.1–8715.7)  | 7973.4 (7329.6–8673.7)  | 8002.2 (7356.1–8705.0)  | 8021.5 (7373.8–8726.0)  |
| 2040 | 7829.4 (7190.0–8525.6)  | 7790.3 (7154.2–8483.0)  | 7819.3 (7180.8–8514.6)  | 7839.0 (7198.9–8536.1)  |

---

All age (1–D)

---

Men

| Year | Reference              | Scenario 1             | Scenario 2             | Scenario 3             |
|------|------------------------|------------------------|------------------------|------------------------|
| 2017 | 4596.6 (4492.7–4702.8) | 4604.9 (4500.9–4711.4) | 4604.9 (4500.9–4711.4) | 4604.9 (4500.9–4711.4) |
| 2018 | 4595.5 (4491.7–4701.7) | 4594.6 (4490.8–4700.7) | 4604.5 (4500.5–4710.9) | 4608.0 (4503.9–4714.4) |
| 2019 | 4594.3 (4490.5–4700.5) | 4583.6 (4480.1–4689.5) | 4603.4 (4499.4–4709.7) | 4610.4 (4506.2–4716.9) |
| 2020 | 4593.4 (4489.6–4699.5) | 4572.9 (4469.6–4678.6) | 4602.5 (4498.5–4708.8) | 4613.0 (4508.8–4719.6) |

|      |                        |                        |                        |                        |
|------|------------------------|------------------------|------------------------|------------------------|
| 2021 | 4592.4 (4488.6–4698.5) | 4562.1 (4459.1–4667.5) | 4601.5 (4497.6–4707.9) | 4615.5 (4511.3–4722.2) |
| 2022 | 4591.4 (4487.7–4697.5) | 4551.4 (4448.6–4656.6) | 4600.6 (4496.7–4706.9) | 4618.1 (4513.8–4724.8) |
| 2023 | 4590.4 (4486.7–4696.4) | 4540.7 (4438.1–4645.6) | 4599.7 (4495.8–4706.0) | 4620.7 (4516.3–4727.4) |
| 2024 | 4589.4 (4485.7–4695.4) | 4538.3 (4435.8–4643.1) | 4598.7 (4494.9–4705.0) | 4623.2 (4518.8–4730.1) |
| 2025 | 4588.4 (4484.7–4694.4) | 4535.8 (4433.4–4640.6) | 4597.8 (4494.0–4704.1) | 4625.8 (4521.3–4732.7) |
| 2026 | 4587.4 (4483.8–4693.4) | 4533.4 (4431.0–4638.1) | 4596.9 (4493.0–4703.1) | 4628.4 (4523.8–4735.3) |
| 2027 | 4586.4 (4482.8–4692.3) | 4531.0 (4428.6–4635.7) | 4595.9 (4492.1–4702.1) | 4631.0 (4526.4–4738.0) |
| 2028 | 4585.4 (4481.8–4691.3) | 4528.5 (4426.2–4633.2) | 4595.0 (4491.2–4701.2) | 4633.5 (4528.9–4740.6) |
| 2029 | 4584.4 (4480.8–4690.3) | 4526.1 (4423.9–4630.7) | 4594.1 (4490.3–4700.2) | 4636.1 (4531.4–4743.2) |
| 2030 | 4583.4 (4479.9–4689.3) | 4523.7 (4421.5–4628.2) | 4593.1 (4489.4–4699.3) | 4638.7 (4533.9–4745.9) |
| 2031 | 4582.4 (4478.9–4688.3) | 4521.2 (4419.1–4625.7) | 4592.2 (4488.5–4698.3) | 4641.3 (4536.4–4748.5) |
| 2032 | 4581.4 (4477.9–4687.2) | 4518.8 (4416.7–4623.2) | 4591.3 (4487.6–4697.4) | 4643.8 (4539.0–4751.2) |
| 2033 | 4580.4 (4476.9–4686.2) | 4516.4 (4414.4–4620.7) | 4590.3 (4486.7–4696.4) | 4646.4 (4541.5–4753.8) |
| 2034 | 4579.4 (4476.0–4685.2) | 4514.0 (4412.0–4618.3) | 4589.4 (4485.8–4695.5) | 4649.0 (4544.0–4756.4) |
| 2035 | 4578.4 (4475.0–4684.2) | 4511.5 (4409.6–4615.8) | 4588.5 (4484.8–4694.5) | 4651.6 (4546.5–4759.1) |
| 2036 | 4577.4 (4474.0–4683.2) | 4509.1 (4407.3–4613.3) | 4587.5 (4483.9–4693.5) | 4654.2 (4549.1–4761.7) |
| 2037 | 4576.4 (4473.0–4682.1) | 4506.7 (4404.9–4610.8) | 4586.6 (4483.0–4692.6) | 4656.8 (4551.6–4764.4) |
| 2038 | 4575.4 (4472.1–4681.1) | 4504.3 (4402.5–4608.3) | 4585.7 (4482.1–4691.6) | 4659.4 (4554.1–4767.0) |
| 2039 | 4574.4 (4471.1–4680.1) | 4501.8 (4400.2–4605.9) | 4584.7 (4481.2–4690.7) | 4662.0 (4556.7–4769.7) |



|      |                        |                        |                        |                        |
|------|------------------------|------------------------|------------------------|------------------------|
| 2040 | 4573.4 (4470.1–4679.1) | 4499.4 (4397.8–4603.4) | 4583.8 (4480.3–4689.7) | 4664.5 (4559.2–4772.3) |
|------|------------------------|------------------------|------------------------|------------------------|

| Women |                        |                        |                        |                        |
|-------|------------------------|------------------------|------------------------|------------------------|
| Year  | Reference              | Scenario 1             | Scenario 2             | Scenario 3             |
| 2017  | 3263.5 (3191.2–3337.4) | 3265.8 (3193.5–3339.8) | 3265.8 (3193.5–3339.8) | 3265.8 (3193.5–3339.8) |
| 2018  | 3374.1 (3248.4–3504.8) | 3375.4 (3249.6–3506.1) | 3377.2 (3251.3–3507.9) | 3377.8 (3251.9–3508.6) |
| 2019  | 3350.4 (3220.3–3485.8) | 3350.5 (3220.4–3486.0) | 3354.0 (3223.7–3489.6) | 3355.3 (3224.9–3490.9) |
| 2020  | 3360.6 (3219.6–3507.8) | 3359.6 (3218.7–3506.7) | 3364.9 (3223.7–3512.2) | 3366.7 (3225.5–3514.2) |
| 2021  | 3374.3 (3227.2–3528.1) | 3372.1 (3225.1–3525.8) | 3379.2 (3231.8–3533.2) | 3381.6 (3234.2–3535.8) |
| 2022  | 3262.9 (3118.5–3413.9) | 3259.6 (3115.4–3410.5) | 3268.1 (3123.6–3419.4) | 3271.1 (3126.4–3422.5) |
| 2023  | 3290.7 (3144.1–3444.1) | 3286.3 (3140.0–3439.5) | 3296.6 (3149.8–3450.3) | 3300.2 (3153.2–3454.1) |
| 2024  | 3203.1 (3057.5–3355.7) | 3198.0 (3052.7–3350.3) | 3209.5 (3063.6–3362.3) | 3213.6 (3067.5–3366.6) |
| 2025  | 3246.3 (3090.7–3409.6) | 3240.2 (3085.0–3403.3) | 3253.2 (3097.3–3417.0) | 3258.0 (3101.9–3422.0) |
| 2026  | 3242.8 (3085.9–3407.7) | 3236.0 (3079.4–3400.5) | 3250.4 (3093.1–3415.6) | 3255.8 (3098.2–3421.3) |
| 2027  | 3248.9 (3089.7–3416.4) | 3241.2 (3082.3–3408.2) | 3257.1 (3097.5–3424.9) | 3263.1 (3103.1–3431.2) |
| 2028  | 3271.0 (3110.8–3439.5) | 3262.3 (3102.5–3430.4) | 3279.8 (3119.1–3448.7) | 3286.4 (3125.4–3455.7) |
| 2029  | 3209.3 (3051.4–3375.3) | 3199.9 (3042.5–3365.5) | 3218.4 (3060.1–3384.9) | 3225.5 (3066.9–3392.4) |
| 2030  | 3206.3 (3048.5–3372.3) | 3196.1 (3038.8–3361.6) | 3216.1 (3057.7–3382.6) | 3223.7 (3065.1–3390.6) |

|      |                        |                        |                        |                        |
|------|------------------------|------------------------|------------------------|------------------------|
| 2031 | 3140.2 (2983.3–3305.3) | 3129.4 (2973.0–3293.9) | 3150.3 (2992.9–3315.9) | 3158.4 (3000.6–3324.4) |
| 2032 | 3138.0 (2980.2–3304.2) | 3126.4 (2969.1–3292.0) | 3148.7 (2990.3–3315.5) | 3157.4 (2998.5–3324.6) |
| 2033 | 3135.4 (2977.6–3301.5) | 3122.9 (2965.7–3288.4) | 3146.6 (2988.2–3313.3) | 3155.8 (2997.0–3323.1) |
| 2034 | 3140.6 (2981.4–3308.3) | 3127.3 (2968.8–3294.3) | 3152.4 (2992.6–3320.7) | 3162.2 (3002.0–3331.1) |
| 2035 | 3165.0 (3004.6–3333.9) | 3150.7 (2991.1–3318.9) | 3177.4 (3016.4–3347.0) | 3187.9 (3026.4–3358.1) |
| 2036 | 3136.5 (2977.3–3304.1) | 3121.5 (2963.1–3288.4) | 3149.3 (2989.6–3317.7) | 3160.3 (3000.0–3329.3) |
| 2037 | 3126.3 (2967.7–3293.4) | 3110.6 (2952.8–3276.9) | 3139.7 (2980.4–3307.6) | 3151.3 (2991.4–3319.7) |
| 2038 | 3076.6 (2919.3–3242.5) | 3060.4 (2903.8–3225.3) | 3090.4 (2932.3–3257.0) | 3102.3 (2943.6–3269.5) |
| 2039 | 3052.9 (2896.7–3217.4) | 3035.9 (2880.7–3199.6) | 3067.1 (2910.2–3232.4) | 3079.5 (2922.0–3245.5) |
| 2040 | 3040.0 (2884.5–3203.8) | 3022.3 (2867.7–3185.2) | 3054.6 (2898.4–3219.3) | 3067.6 (2910.7–3232.9) |

---

Both sexes combined

---

| Year | Reference              | Scenario 1             | Scenario 2             | Scenario 3             |
|------|------------------------|------------------------|------------------------|------------------------|
| 2017 | 4039.6 (3968.1–4112.4) | 4047.0 (3975.4–4119.9) | 4047.0 (3975.4–4119.9) | 4047.0 (3975.4–4119.9) |
| 2018 | 4004.6 (3883.0–4129.9) | 4005.4 (3883.9–4130.8) | 4012.9 (3891.2–4138.5) | 4015.6 (3893.7–4141.3) |
| 2019 | 4011.2 (3890.3–4135.8) | 4005.6 (3884.8–4130.1) | 4020.6 (3899.4–4145.6) | 4025.9 (3904.6–4151.0) |
| 2020 | 3976.4 (3851.4–4105.5) | 3964.5 (3839.8–4093.1) | 3986.8 (3861.4–4116.2) | 3994.7 (3869.1–4124.4) |
| 2021 | 3939.9 (3815.8–4068.0) | 3921.7 (3798.2–4049.2) | 3951.2 (3826.7–4079.6) | 3961.6 (3836.9–4090.4) |

|      |                        |                        |                        |                        |
|------|------------------------|------------------------|------------------------|------------------------|
| 2022 | 3958.9 (3833.0–4088.9) | 3934.2 (3809.1–4063.5) | 3971.2 (3844.9–4101.7) | 3984.4 (3857.6–4115.3) |
| 2023 | 3994.0 (3867.2–4124.9) | 3962.7 (3836.9–4092.6) | 4007.5 (3880.3–4138.8) | 4023.4 (3895.7–4155.3) |
| 2024 | 4016.0 (3886.0–4150.4) | 3982.7 (3853.8–4116.0) | 4030.6 (3900.1–4165.5) | 4049.3 (3918.2–4184.8) |
| 2025 | 4014.9 (3883.2–4151.0) | 3979.7 (3849.2–4114.7) | 4030.5 (3898.3–4167.2) | 4051.8 (3919.0–4189.2) |
| 2026 | 3985.2 (3854.8–4119.9) | 3948.4 (3819.3–4081.9) | 4001.7 (3870.9–4137.0) | 4025.6 (3893.9–4161.7) |
| 2027 | 3951.9 (3822.0–4086.1) | 3913.6 (3785.1–4046.6) | 3969.3 (3838.9–4104.2) | 3995.6 (3864.3–4131.4) |
| 2028 | 3945.0 (3813.6–4080.9) | 3905.0 (3774.9–4039.5) | 3963.4 (3831.4–4100.0) | 3992.3 (3859.3–4129.9) |
| 2029 | 3967.1 (3834.9–4103.9) | 3925.1 (3794.2–4060.4) | 3986.7 (3853.8–4124.1) | 4018.4 (3884.4–4157.0) |
| 2030 | 3998.4 (3864.9–4136.5) | 3954.2 (3822.2–4090.8) | 4019.2 (3885.0–4158.0) | 4053.8 (3918.5–4193.8) |
| 2031 | 4012.6 (3876.9–4153.0) | 3966.3 (3832.2–4105.2) | 4034.4 (3897.9–4175.6) | 4071.9 (3934.2–4214.4) |
| 2032 | 3996.7 (3861.1–4137.2) | 3948.8 (3814.8–4087.6) | 4019.5 (3883.1–4160.8) | 4059.5 (3921.7–4202.2) |
| 2033 | 3964.3 (3829.9–4103.4) | 3914.9 (3782.2–4052.3) | 3987.9 (3852.7–4127.8) | 4030.3 (3893.7–4171.7) |
| 2034 | 3942.5 (3807.5–4082.2) | 3891.6 (3758.3–4029.5) | 3967.0 (3831.2–4107.6) | 4011.8 (3874.4–4154.0) |
| 2035 | 3948.3 (3812.1–4089.3) | 3895.5 (3761.2–4034.6) | 3973.8 (3836.8–4115.8) | 4021.4 (3882.7–4165.0) |
| 2036 | 3975.6 (3838.8–4117.3) | 3920.6 (3785.7–4060.3) | 4002.3 (3864.6–4145.0) | 4052.9 (3913.4–4197.3) |
| 2037 | 4000.5 (3862.0–4144.0) | 3943.3 (3806.8–4084.8) | 4028.5 (3889.0–4173.0) | 4082.1 (3940.7–4228.5) |
| 2038 | 4001.3 (3861.5–4146.2) | 3942.3 (3804.6–4085.1) | 4030.3 (3889.5–4176.3) | 4086.6 (3943.8–4234.6) |
| 2039 | 3977.2 (3838.3–4121.0) | 3916.7 (3780.0–4058.4) | 4007.0 (3867.2–4152.0) | 4065.7 (3923.8–4212.8) |

2040      3948.4 (3810.2–4091.6)                      3886.5 (3750.5–4027.5)                      3979.1 (3839.8–4123.4)                      4040.0 (3898.6–4186.5)

| Chronic kidney disease (2) |                     |                     |                     |                     |
|----------------------------|---------------------|---------------------|---------------------|---------------------|
| Men (2–A)                  |                     |                     |                     |                     |
| 20–49                      |                     |                     |                     |                     |
| Year                       | Reference           | Scenario 1          | Scenario 2          | Scenario 3          |
| 2017                       | 118.5 (116.7–120.3) | 118.6 (116.8–120.4) | 118.6 (116.8–120.4) | 118.6 (116.8–120.4) |
| 2018                       | 115.0 (112.2–117.9) | 115.0 (112.2–117.9) | 115.1 (112.3–118.0) | 115.2 (112.4–118.1) |
| 2019                       | 113.6 (110.5–116.9) | 113.4 (110.3–116.7) | 113.8 (110.6–117.0) | 113.9 (110.7–117.1) |
| 2020                       | 113.7 (110.4–117.1) | 113.4 (110.0–116.8) | 113.9 (110.5–117.3) | 114.0 (110.7–117.5) |
| 2021                       | 112.5 (109.1–116.1) | 112.1 (108.6–115.7) | 112.7 (109.2–116.3) | 113.0 (109.5–116.6) |
| 2022                       | 111.6 (108.0–115.4) | 111.1 (107.4–114.8) | 111.8 (108.2–115.6) | 112.1 (108.5–115.9) |
| 2023                       | 111.2 (107.5–114.9) | 110.4 (106.8–114.2) | 111.4 (107.8–115.1) | 111.7 (108.1–115.5) |
| 2024                       | 110.9 (107.3–114.7) | 110.2 (106.6–114.0) | 111.2 (107.5–115.0) | 111.6 (107.9–115.4) |
| 2025                       | 111.0 (107.3–114.8) | 110.2 (106.6–114.0) | 111.2 (107.6–115.0) | 111.7 (108.0–115.5) |
| 2026                       | 111.6 (107.6–115.7) | 110.8 (106.9–114.9) | 111.9 (107.9–116.0) | 112.4 (108.4–116.5) |
| 2027                       | 113.3 (109.0–117.7) | 112.5 (108.3–116.9) | 113.6 (109.4–118.0) | 114.2 (109.9–118.6) |
| 2028                       | 111.7 (107.4–116.1) | 110.9 (106.6–115.3) | 112.0 (107.7–116.5) | 112.6 (108.3–117.1) |

|      |                     |                     |                     |                     |
|------|---------------------|---------------------|---------------------|---------------------|
| 2029 | 110.5 (106.2–114.9) | 109.7 (105.4–114.1) | 110.8 (106.5–115.3) | 111.5 (107.2–116.0) |
| 2030 | 110.8 (106.3–115.5) | 110.0 (105.5–114.6) | 111.2 (106.7–115.8) | 111.9 (107.4–116.6) |
| 2031 | 109.9 (105.4–114.6) | 109.1 (104.6–113.7) | 110.3 (105.8–115.0) | 111.1 (106.5–115.8) |
| 2032 | 108.8 (104.3–113.4) | 107.9 (103.5–112.6) | 109.2 (104.7–113.9) | 110.0 (105.5–114.7) |
| 2033 | 107.4 (103.0–112.0) | 106.5 (102.1–111.1) | 107.8 (103.4–112.5) | 108.7 (104.2–113.4) |
| 2034 | 106.0 (101.6–110.6) | 105.1 (100.7–109.7) | 106.4 (102.0–111.1) | 107.3 (102.9–112.0) |
| 2035 | 103.4 (99.0–108.1)  | 102.6 (98.1–107.2)  | 103.9 (99.4–108.5)  | 104.8 (100.3–109.5) |
| 2036 | 102.2 (97.7–106.8)  | 101.3 (96.9–106.0)  | 102.6 (98.1–107.3)  | 103.6 (99.1–108.4)  |
| 2037 | 102.1 (97.6–106.8)  | 101.2 (96.8–105.9)  | 102.6 (98.1–107.3)  | 103.6 (99.0–108.4)  |
| 2038 | 100.8 (96.3–105.5)  | 99.9 (95.4–104.6)   | 101.3 (96.7–106.0)  | 102.3 (97.8–107.1)  |
| 2039 | 99.8 (95.2–104.6)   | 98.9 (94.4–103.7)   | 100.3 (95.7–105.1)  | 101.4 (96.8–106.3)  |
| 2040 | 98.8 (94.3–103.6)   | 97.9 (93.4–102.7)   | 99.4 (94.8–104.2)   | 100.5 (95.9–105.4)  |

---

50–69

| Year | Reference           | Scenario 1          | Scenario 2          | Scenario 3          |
|------|---------------------|---------------------|---------------------|---------------------|
| 2017 | 680.3 (665.1–695.8) | 682.4 (667.2–697.9) | 682.4 (667.2–697.9) | 682.4 (667.2–697.9) |
| 2018 | 671.5 (627.9–718.1) | 669.5 (626.1–716.0) | 673.3 (629.6–720.0) | 674.6 (630.8–721.4) |
| 2019 | 667.9 (596.2–748.3) | 662.0 (590.9–741.7) | 669.5 (597.5–750.0) | 672.1 (599.9–753.0) |

|      |                      |                      |                      |                      |
|------|----------------------|----------------------|----------------------|----------------------|
| 2020 | 660.0 (558.1–780.5)  | 650.2 (549.8–769.0)  | 661.2 (559.1–782.0)  | 665.1 (562.4–786.6)  |
| 2021 | 653.9 (516.6–827.6)  | 640.4 (505.9–810.5)  | 654.8 (517.4–828.8)  | 660.0 (521.4–835.4)  |
| 2022 | 652.6 (481.4–884.6)  | 635.3 (468.7–861.2)  | 653.3 (481.9–885.5)  | 659.7 (486.7–894.3)  |
| 2023 | 647.9 (445.7–941.8)  | 626.9 (431.3–911.4)  | 648.3 (445.9–942.4)  | 656.0 (451.2–953.6)  |
| 2024 | 644.0 (409.7–1012.2) | 622.6 (396.1–978.6)  | 644.1 (409.8–1012.4) | 653.0 (415.5–1026.4) |
| 2025 | 644.9 (379.4–1096.1) | 622.9 (366.5–1058.7) | 644.7 (379.3–1095.8) | 655.0 (385.3–1113.2) |
| 2026 | 643.0 (350.1–1180.9) | 620.5 (337.8–1139.6) | 642.6 (349.9–1180.2) | 654.1 (356.1–1201.2) |
| 2027 | 641.1 (321.4–1278.8) | 618.1 (309.9–1233.0) | 640.5 (321.1–1277.5) | 653.2 (327.5–1302.9) |
| 2028 | 644.0 (297.4–1394.7) | 620.3 (286.4–1343.4) | 643.0 (296.9–1392.7) | 657.1 (303.4–1423.1) |
| 2029 | 644.7 (274.7–1513.0) | 620.4 (264.4–1456.1) | 643.5 (274.2–1510.2) | 658.9 (280.7–1546.3) |
| 2030 | 644.8 (252.8–1644.9) | 620.0 (243.1–1581.5) | 643.4 (252.2–1641.1) | 660.0 (258.8–1683.6) |
| 2031 | 649.5 (234.4–1799.7) | 623.9 (225.2–1728.7) | 647.7 (233.8–1794.8) | 665.8 (240.3–1845.0) |
| 2032 | 652.6 (217.4–1959.1) | 626.3 (208.6–1880.2) | 650.6 (216.7–1953.1) | 670.1 (223.2–2011.6) |
| 2033 | 654.7 (201.0–2132.3) | 627.7 (192.7–2044.5) | 652.4 (200.3–2124.8) | 673.2 (206.7–2192.8) |
| 2034 | 661.0 (187.2–2334.0) | 633.2 (179.3–2235.8) | 658.4 (186.5–2324.8) | 680.8 (192.8–2403.9) |
| 2035 | 666.4 (174.6–2543.1) | 637.8 (167.1–2433.8) | 663.5 (173.9–2532.0) | 687.5 (180.2–2623.3) |
| 2036 | 670.4 (162.5–2765.5) | 641.0 (155.4–2644.2) | 667.2 (161.7–2752.3) | 692.6 (167.9–2857.2) |
| 2037 | 678.3 (152.3–3022.0) | 648.0 (145.4–2886.9) | 674.8 (151.5–3006.4) | 701.9 (157.5–3127.1) |
| 2038 | 685.9 (143.0–3289.3) | 654.6 (136.5–3139.3) | 682.1 (142.2–3270.9) | 710.9 (148.2–3409.0) |

|      |                      |                      |                      |                      |
|------|----------------------|----------------------|----------------------|----------------------|
| 2039 | 691.7 (134.1–3568.6) | 659.6 (127.8–3402.7) | 687.6 (133.3–3547.2) | 718.0 (139.2–3704.1) |
| 2040 | 701.2 (126.5–3887.2) | 668.0 (120.5–3703.1) | 696.7 (125.7–3862.3) | 729.0 (131.5–4041.1) |

| ≥70  |                        |                        |                        |                        |
|------|------------------------|------------------------|------------------------|------------------------|
| Year | Reference              | Scenario 1             | Scenario 2             | Scenario 3             |
| 2017 | 1944.8 (1900.3–1990.3) | 1945.7 (1901.2–1991.2) | 1945.7 (1901.2–1991.2) | 1945.7 (1901.2–1991.2) |
| 2018 | 1956.8 (1891.5–2024.3) | 1953.6 (1888.5–2021.0) | 1956.9 (1891.7–2024.5) | 1958.1 (1892.8–2025.7) |
| 2019 | 1979.5 (1912.5–2048.9) | 1972.3 (1905.5–2041.4) | 1979.0 (1912.0–2048.3) | 1981.3 (1914.3–2050.7) |
| 2020 | 2008.2 (1939.9–2078.9) | 1996.7 (1928.8–2067.0) | 2006.9 (1938.6–2077.6) | 2010.5 (1942.1–2081.3) |
| 2021 | 2025.6 (1956.3–2097.4) | 2009.9 (1941.1–2081.1) | 2023.5 (1954.3–2095.2) | 2028.4 (1959.0–2100.2) |
| 2022 | 2030.3 (1952.9–2110.7) | 2010.4 (1933.7–2090.0) | 2027.5 (1950.2–2107.8) | 2033.5 (1956.0–2114.1) |
| 2023 | 2022.6 (1940.2–2108.5) | 1998.7 (1917.2–2083.6) | 2019.1 (1936.8–2104.8) | 2026.3 (1943.8–2112.4) |
| 2024 | 1996.0 (1913.0–2082.6) | 1971.0 (1889.1–2056.6) | 1991.7 (1908.9–2078.1) | 2000.1 (1916.9–2086.8) |
| 2025 | 1953.4 (1869.4–2041.3) | 1927.8 (1844.8–2014.5) | 1948.5 (1864.7–2036.2) | 1957.9 (1873.6–2045.9) |
| 2026 | 1908.0 (1823.8–1996.1) | 1881.8 (1798.7–1968.7) | 1902.6 (1818.6–1990.4) | 1912.8 (1828.4–2001.1) |
| 2027 | 1863.5 (1781.4–1949.3) | 1836.7 (1755.8–1921.3) | 1857.4 (1775.6–1943.0) | 1868.6 (1786.3–1954.7) |
| 2028 | 1825.5 (1744.8–1910.0) | 1798.1 (1718.6–1881.3) | 1819.0 (1738.5–1903.1) | 1831.0 (1750.0–1915.7) |
| 2029 | 1800.7 (1719.2–1886.0) | 1772.5 (1692.3–1856.5) | 1793.5 (1712.4–1878.5) | 1806.4 (1724.7–1892.0) |

|      |                        |                        |                        |                        |
|------|------------------------|------------------------|------------------------|------------------------|
| 2030 | 1791.7 (1706.7–1881.0) | 1762.6 (1679.0–1850.4) | 1784.0 (1699.3–1872.8) | 1797.9 (1712.6–1887.4) |
| 2031 | 1793.1 (1704.0–1886.8) | 1762.8 (1675.3–1854.9) | 1784.6 (1696.0–1877.9) | 1799.6 (1710.3–1893.7) |
| 2032 | 1804.2 (1714.2–1898.9) | 1772.6 (1684.2–1865.6) | 1795.0 (1705.5–1889.3) | 1811.2 (1720.8–1906.3) |
| 2033 | 1819.3 (1728.4–1914.9) | 1786.3 (1697.0–1880.2) | 1809.4 (1719.0–1904.5) | 1826.7 (1735.5–1922.8) |
| 2034 | 1828.5 (1736.7–1925.2) | 1794.2 (1704.1–1889.1) | 1817.9 (1726.6–1914.0) | 1836.5 (1744.2–1933.6) |
| 2035 | 1828.2 (1735.3–1926.1) | 1792.8 (1701.6–1888.7) | 1816.9 (1724.6–1914.2) | 1836.6 (1743.2–1934.9) |
| 2036 | 1817.3 (1722.4–1917.3) | 1780.9 (1688.0–1878.9) | 1805.4 (1711.2–1904.8) | 1826.0 (1730.7–1926.5) |
| 2037 | 1792.2 (1697.3–1892.4) | 1755.2 (1662.3–1853.3) | 1779.8 (1685.6–1879.3) | 1801.2 (1705.9–1901.9) |
| 2038 | 1756.8 (1661.9–1857.1) | 1719.4 (1626.5–1817.6) | 1744.0 (1649.8–1843.5) | 1766.0 (1670.6–1866.8) |
| 2039 | 1718.4 (1624.7–1817.5) | 1680.8 (1589.1–1777.7) | 1705.3 (1612.3–1803.6) | 1727.8 (1633.6–1827.5) |
| 2040 | 1681.1 (1589.8–1777.6) | 1643.2 (1554.0–1737.6) | 1667.6 (1577.1–1763.4) | 1690.7 (1598.9–1787.8) |

---

Women (2–B)

---

20–49

---

| Year | Reference           | Scenario 1          | Scenario 2          | Scenario 3          |
|------|---------------------|---------------------|---------------------|---------------------|
| 2017 | 110.1 (108.1–112.1) | 110.4 (108.5–112.5) | 110.4 (108.5–112.5) | 110.4 (108.5–112.5) |
| 2018 | 108.8 (105.6–112.0) | 109.1 (105.9–112.4) | 109.2 (106.0–112.5) | 109.2 (106.1–112.5) |
| 2019 | 107.9 (103.9–112.0) | 108.3 (104.3–112.4) | 108.5 (104.5–112.6) | 108.5 (104.5–112.7) |



|      |                     |                     |                     |                     |
|------|---------------------|---------------------|---------------------|---------------------|
| 2020 | 106.9 (101.9–112.3) | 107.4 (102.3–112.8) | 107.7 (102.6–113.0) | 107.8 (102.6–113.1) |
| 2021 | 105.7 (99.9–111.8)  | 106.2 (100.4–112.3) | 106.5 (100.7–112.7) | 106.6 (100.8–112.8) |
| 2022 | 104.9 (98.8–111.3)  | 105.5 (99.4–111.9)  | 105.9 (99.8–112.3)  | 106.0 (99.9–112.5)  |
| 2023 | 104.2 (97.9–110.9)  | 104.8 (98.5–111.6)  | 105.3 (98.9–112.1)  | 105.5 (99.1–112.3)  |
| 2024 | 103.4 (97.0–110.2)  | 104.0 (97.6–110.8)  | 104.6 (98.2–111.5)  | 104.8 (98.4–111.7)  |
| 2025 | 103.0 (96.6–109.8)  | 103.5 (97.1–110.3)  | 104.3 (97.9–111.2)  | 104.6 (98.1–111.4)  |
| 2026 | 102.6 (96.3–109.4)  | 103.1 (96.7–109.9)  | 104.1 (97.7–111.0)  | 104.4 (97.9–111.2)  |
| 2027 | 102.2 (95.9–108.9)  | 102.6 (96.2–109.4)  | 103.8 (97.3–110.6)  | 104.1 (97.6–110.9)  |
| 2028 | 101.9 (95.6–108.7)  | 102.3 (95.9–109.1)  | 103.6 (97.2–110.5)  | 104.0 (97.5–110.8)  |
| 2029 | 101.7 (95.3–108.5)  | 102.0 (95.6–108.8)  | 103.5 (97.1–110.4)  | 103.9 (97.4–110.8)  |
| 2030 | 101.3 (95.0–108.1)  | 101.6 (95.2–108.4)  | 103.3 (96.8–110.2)  | 103.6 (97.2–110.6)  |
| 2031 | 101.0 (94.7–107.8)  | 101.2 (94.9–108.0)  | 103.1 (96.6–110.0)  | 103.5 (97.0–110.5)  |
| 2032 | 100.7 (94.4–107.5)  | 100.9 (94.5–107.7)  | 102.9 (96.4–109.9)  | 103.4 (96.8–110.3)  |
| 2033 | 100.3 (94.0–107.1)  | 100.4 (94.1–107.2)  | 102.6 (96.2–109.5)  | 103.1 (96.6–110.0)  |
| 2034 | 99.9 (93.6–106.7)   | 100.0 (93.7–106.7)  | 102.4 (95.9–109.3)  | 102.8 (96.3–109.8)  |
| 2035 | 99.5 (93.2–106.2)   | 99.5 (93.3–106.2)   | 102.1 (95.6–109.0)  | 102.6 (96.1–109.5)  |
| 2036 | 99.1 (92.8–105.7)   | 99.0 (92.8–105.7)   | 101.7 (95.3–108.6)  | 102.3 (95.8–109.1)  |
| 2037 | 98.6 (92.4–105.3)   | 98.5 (92.3–105.2)   | 101.4 (95.0–108.2)  | 102.0 (95.5–108.8)  |
| 2038 | 98.2 (92.0–104.8)   | 98.1 (91.9–104.7)   | 101.1 (94.7–107.9)  | 101.7 (95.2–108.5)  |

|      |                   |                   |                    |                    |
|------|-------------------|-------------------|--------------------|--------------------|
| 2039 | 97.7 (91.5–104.3) | 97.5 (91.4–104.1) | 100.7 (94.4–107.5) | 101.3 (94.9–108.2) |
| 2040 | 97.3 (91.1–103.9) | 97.1 (90.9–103.6) | 100.4 (94.1–107.2) | 101.0 (94.6–107.9) |

| 50–69 |                     |                     |                     |                     |
|-------|---------------------|---------------------|---------------------|---------------------|
| Year  | Reference           | Scenario 1          | Scenario 2          | Scenario 3          |
| 2017  | 410.8 (405.4–416.3) | 412.2 (406.7–417.7) | 412.2 (406.7–417.7) | 412.2 (406.7–417.7) |
| 2018  | 403.7 (397.3–410.3) | 403.9 (397.5–410.5) | 405.3 (398.8–411.9) | 405.7 (399.2–412.3) |
| 2019  | 400.8 (394.3–407.3) | 399.8 (393.4–406.4) | 402.5 (396.0–409.1) | 403.4 (396.9–410.0) |
| 2020  | 401.3 (393.6–409.1) | 399.2 (391.5–407.0) | 403.2 (395.4–411.0) | 404.6 (396.8–412.5) |
| 2021  | 396.1 (388.5–403.9) | 393.0 (385.5–400.7) | 398.2 (390.6–406.0) | 400.1 (392.4–407.9) |
| 2022  | 394.1 (386.5–401.9) | 389.9 (382.3–397.6) | 396.4 (388.7–404.2) | 398.7 (391.0–406.6) |
| 2023  | 394.0 (386.4–401.8) | 388.7 (381.2–396.3) | 396.4 (388.8–404.3) | 399.2 (391.5–407.1) |
| 2024  | 389.8 (382.1–397.7) | 384.0 (376.4–391.8) | 392.4 (384.7–400.3) | 395.6 (387.8–403.6) |
| 2025  | 386.6 (378.1–395.3) | 380.3 (372.0–388.9) | 389.4 (380.9–398.1) | 393.0 (384.4–401.9) |
| 2026  | 385.5 (377.1–394.2) | 378.7 (370.4–387.2) | 388.5 (380.0–397.2) | 392.6 (384.0–401.4) |
| 2027  | 380.9 (372.4–389.5) | 373.6 (365.3–382.1) | 384.0 (375.5–392.7) | 388.5 (379.9–397.3) |
| 2028  | 377.0 (368.4–385.7) | 369.3 (360.9–377.9) | 380.3 (371.6–389.1) | 385.2 (376.4–394.1) |
| 2029  | 375.1 (366.6–383.7) | 366.9 (358.6–375.4) | 378.5 (370.0–387.2) | 383.8 (375.2–392.7) |

|      |                     |                     |                     |                     |
|------|---------------------|---------------------|---------------------|---------------------|
| 2030 | 370.7 (362.2–379.3) | 362.1 (353.8–370.5) | 374.2 (365.7–383.0) | 379.9 (371.3–388.8) |
| 2031 | 367.2 (358.8–375.8) | 358.2 (350.0–366.5) | 370.9 (362.5–379.6) | 377.0 (368.4–385.8) |
| 2032 | 365.2 (356.7–373.9) | 355.7 (347.5–364.2) | 369.1 (360.5–377.9) | 375.6 (366.9–384.6) |
| 2033 | 361.9 (353.3–370.8) | 352.0 (343.7–360.6) | 366.0 (357.3–374.9) | 372.8 (364.0–381.9) |
| 2034 | 358.9 (350.4–367.6) | 348.6 (340.3–357.1) | 363.1 (354.5–371.9) | 370.3 (361.6–379.3) |
| 2035 | 357.4 (348.9–366.1) | 346.7 (338.4–355.1) | 361.7 (353.1–370.6) | 369.4 (360.6–378.4) |
| 2036 | 354.5 (346.1–363.1) | 343.3 (335.2–351.7) | 359.0 (350.4–367.7) | 367.0 (358.3–375.9) |
| 2037 | 351.8 (343.3–360.4) | 340.2 (332.1–348.6) | 356.4 (347.8–365.1) | 364.8 (356.0–373.7) |
| 2038 | 350.0 (341.6–358.6) | 338.0 (329.9–346.3) | 354.7 (346.2–363.4) | 363.5 (354.8–372.4) |
| 2039 | 346.9 (338.6–355.5) | 334.6 (326.6–342.8) | 351.8 (343.4–360.5) | 360.9 (352.3–369.8) |
| 2040 | 344.0 (335.7–352.6) | 331.3 (323.3–339.6) | 349.0 (340.5–357.7) | 358.5 (349.8–367.4) |

---

≥70

| Year | Reference              | Scenario 1             | Scenario 2             | Scenario 3             |
|------|------------------------|------------------------|------------------------|------------------------|
| 2017 | 1464.8 (1434.8–1495.4) | 1465.9 (1435.9–1496.5) | 1465.9 (1435.9–1496.5) | 1465.9 (1435.9–1496.5) |
| 2018 | 1434.3 (1393.4–1476.4) | 1432.4 (1391.5–1474.4) | 1435.1 (1394.2–1477.2) | 1436.0 (1395.1–1478.1) |
| 2019 | 1427.0 (1380.5–1475.0) | 1422.0 (1375.7–1469.8) | 1427.3 (1380.9–1475.3) | 1429.2 (1382.7–1477.3) |
| 2020 | 1404.9 (1353.1–1458.8) | 1397.0 (1345.5–1450.6) | 1404.9 (1353.1–1458.7) | 1407.7 (1355.8–1461.6) |

|      |                        |                        |                        |                        |
|------|------------------------|------------------------|------------------------|------------------------|
| 2021 | 1392.4 (1341.4–1445.3) | 1381.6 (1331.0–1434.1) | 1392.0 (1341.0–1444.9) | 1395.7 (1344.6–1448.7) |
| 2022 | 1394.8 (1343.6–1448.0) | 1381.0 (1330.3–1433.7) | 1394.0 (1342.8–1447.2) | 1398.7 (1347.3–1452.0) |
| 2023 | 1377.2 (1326.6–1429.6) | 1360.6 (1310.7–1412.5) | 1376.0 (1325.5–1428.4) | 1381.5 (1330.8–1434.1) |
| 2024 | 1373.1 (1320.8–1427.3) | 1354.6 (1303.1–1408.2) | 1371.6 (1319.4–1425.8) | 1377.9 (1325.5–1432.4) |
| 2025 | 1371.5 (1317.6–1427.5) | 1351.0 (1298.0–1406.2) | 1369.6 (1315.9–1425.6) | 1376.9 (1322.8–1433.1) |
| 2026 | 1355.6 (1299.9–1413.6) | 1333.4 (1278.6–1390.5) | 1353.4 (1297.8–1411.3) | 1361.4 (1305.5–1419.8) |
| 2027 | 1354.1 (1294.1–1416.8) | 1330.0 (1271.1–1391.7) | 1351.5 (1291.7–1414.2) | 1360.5 (1300.3–1423.6) |
| 2028 | 1343.6 (1283.2–1406.9) | 1317.8 (1258.6–1379.8) | 1340.7 (1280.5–1403.8) | 1350.5 (1289.8–1414.1) |
| 2029 | 1324.7 (1264.3–1388.0) | 1297.3 (1238.1–1359.3) | 1321.5 (1261.2–1384.6) | 1332.0 (1271.3–1395.6) |
| 2030 | 1317.2 (1256.9–1380.4) | 1288.1 (1229.1–1349.9) | 1313.6 (1253.5–1376.7) | 1325.0 (1264.3–1388.6) |
| 2031 | 1297.7 (1238.1–1360.0) | 1267.1 (1209.0–1328.0) | 1293.8 (1234.5–1356.0) | 1305.8 (1245.9–1368.6) |
| 2032 | 1279.4 (1220.5–1341.2) | 1247.4 (1190.0–1307.7) | 1275.3 (1216.5–1336.8) | 1288.0 (1228.7–1350.2) |
| 2033 | 1268.8 (1209.5–1330.9) | 1235.3 (1177.6–1295.8) | 1264.4 (1205.3–1326.3) | 1277.8 (1218.1–1340.4) |
| 2034 | 1248.0 (1187.7–1311.3) | 1213.2 (1154.7–1274.8) | 1243.3 (1183.3–1306.3) | 1257.3 (1196.6–1321.1) |
| 2035 | 1234.9 (1174.5–1298.5) | 1198.8 (1140.1–1260.5) | 1229.9 (1169.7–1293.2) | 1244.7 (1183.7–1308.7) |
| 2036 | 1225.0 (1163.9–1289.3) | 1187.4 (1128.1–1249.7) | 1219.7 (1158.9–1283.8) | 1235.1 (1173.5–1300.0) |
| 2037 | 1209.0 (1148.1–1273.1) | 1170.1 (1111.2–1232.2) | 1203.5 (1142.8–1267.3) | 1219.5 (1158.1–1284.2) |
| 2038 | 1202.5 (1142.0–1266.3) | 1162.2 (1103.7–1223.8) | 1196.7 (1136.5–1260.2) | 1213.5 (1152.4–1277.8) |
| 2039 | 1194.2 (1134.0–1257.5) | 1152.4 (1094.4–1213.6) | 1188.1 (1128.2–1251.1) | 1205.5 (1144.8–1269.5) |

|      |                        |                        |                        |                        |
|------|------------------------|------------------------|------------------------|------------------------|
| 2040 | 1183.0 (1123.3–1245.9) | 1140.0 (1082.5–1200.6) | 1176.7 (1117.3–1239.2) | 1194.7 (1134.4–1258.2) |
|------|------------------------|------------------------|------------------------|------------------------|

| Both sexes combined (2–C) |                     |                     |                     |                     |
|---------------------------|---------------------|---------------------|---------------------|---------------------|
| 20–49                     |                     |                     |                     |                     |
| Year                      | Reference           | Scenario 1          | Scenario 2          | Scenario 3          |
| 2017                      | 113.2 (111.4–115.0) | 113.4 (111.6–115.2) | 113.4 (111.6–115.2) | 113.4 (111.6–115.2) |
| 2018                      | 110.8 (108.5–113.3) | 110.9 (108.6–113.4) | 111.0 (108.7–113.5) | 111.1 (108.7–113.5) |
| 2019                      | 109.4 (106.6–112.3) | 109.5 (106.7–112.3) | 109.6 (106.8–112.5) | 109.7 (106.9–112.6) |
| 2020                      | 107.6 (104.5–110.9) | 107.6 (104.5–110.9) | 107.9 (104.8–111.1) | 108.0 (104.9–111.2) |
| 2021                      | 106.3 (103.1–109.5) | 106.2 (103.1–109.4) | 106.6 (103.4–109.8) | 106.7 (103.5–109.9) |
| 2022                      | 106.3 (103.2–109.5) | 106.2 (103.0–109.4) | 106.6 (103.5–109.9) | 106.8 (103.6–110.0) |
| 2023                      | 105.5 (102.4–108.7) | 105.3 (102.2–108.5) | 105.9 (102.7–109.1) | 106.0 (102.9–109.3) |
| 2024                      | 105.4 (102.2–108.6) | 105.2 (102.0–108.5) | 105.8 (102.6–109.1) | 106.0 (102.8–109.3) |
| 2025                      | 106.1 (102.8–109.5) | 105.9 (102.6–109.3) | 106.5 (103.2–109.9) | 106.8 (103.4–110.2) |
| 2026                      | 106.2 (102.8–109.7) | 105.9 (102.6–109.4) | 106.7 (103.3–110.2) | 106.9 (103.5–110.5) |
| 2027                      | 106.6 (103.0–110.3) | 106.3 (102.7–110.1) | 107.1 (103.5–110.9) | 107.4 (103.8–111.2) |
| 2028                      | 107.5 (103.6–111.6) | 107.2 (103.3–111.3) | 108.1 (104.2–112.2) | 108.4 (104.5–112.5) |
| 2029                      | 107.2 (103.3–111.3) | 107.0 (103.0–111.1) | 107.9 (103.9–112.0) | 108.3 (104.3–112.4) |

|      |                     |                     |                     |                     |
|------|---------------------|---------------------|---------------------|---------------------|
| 2030 | 107.1 (103.1–111.3) | 106.8 (102.8–111.0) | 107.7 (103.7–112.0) | 108.2 (104.1–112.4) |
| 2031 | 106.9 (102.8–111.1) | 106.5 (102.5–110.7) | 107.6 (103.5–111.8) | 108.0 (103.9–112.2) |
| 2032 | 105.6 (101.6–109.7) | 105.2 (101.2–109.4) | 106.3 (102.3–110.5) | 106.8 (102.7–111.0) |
| 2033 | 104.3 (100.4–108.5) | 104.0 (100.0–108.1) | 105.1 (101.1–109.3) | 105.6 (101.6–109.8) |
| 2034 | 103.2 (99.2–107.4)  | 102.9 (98.9–107.0)  | 104.0 (100.0–108.2) | 104.6 (100.5–108.8) |
| 2035 | 101.4 (97.3–105.6)  | 101.0 (96.9–105.2)  | 102.2 (98.1–106.5)  | 102.7 (98.6–107.0)  |
| 2036 | 99.9 (95.8–104.2)   | 99.5 (95.5–103.8)   | 100.8 (96.6–105.1)  | 101.3 (97.2–105.7)  |
| 2037 | 98.8 (94.6–103.1)   | 98.4 (94.2–102.7)   | 99.6 (95.5–104.0)   | 100.2 (96.0–104.6)  |
| 2038 | 97.3 (93.1–101.6)   | 96.9 (92.7–101.2)   | 98.2 (93.9–102.6)   | 98.8 (94.5–103.2)   |
| 2039 | 96.5 (92.3–100.8)   | 96.0 (91.9–100.4)   | 97.4 (93.2–101.8)   | 98.0 (93.8–102.4)   |
| 2040 | 96.1 (91.9–100.4)   | 95.6 (91.5–99.9)    | 97.0 (92.9–101.4)   | 97.7 (93.5–102.1)   |

---

50–69

| Year | Reference           | Scenario 1          | Scenario 2          | Scenario 3          |
|------|---------------------|---------------------|---------------------|---------------------|
| 2017 | 552.9 (545.7–560.2) | 554.7 (547.5–561.9) | 554.7 (547.5–561.9) | 554.7 (547.5–561.9) |
| 2018 | 551.2 (534.2–568.7) | 550.5 (533.5–568.1) | 552.9 (535.9–570.6) | 553.8 (536.7–571.5) |
| 2019 | 557.5 (534.8–581.2) | 554.4 (531.9–578.0) | 559.3 (536.6–583.1) | 561.1 (538.2–584.9) |
| 2020 | 566.1 (539.0–594.6) | 560.5 (533.7–588.7) | 568.0 (540.8–596.6) | 570.6 (543.3–599.4) |

|      |                     |                     |                     |                     |
|------|---------------------|---------------------|---------------------|---------------------|
| 2021 | 567.9 (537.2–600.3) | 559.8 (529.6–591.8) | 569.8 (539.0–602.3) | 573.3 (542.4–606.0) |
| 2022 | 572.7 (541.1–606.2) | 562.1 (531.1–594.9) | 574.6 (542.9–608.2) | 579.1 (547.2–612.9) |
| 2023 | 576.9 (545.0–610.6) | 563.7 (532.6–596.6) | 578.8 (546.9–612.6) | 584.2 (552.0–618.4) |
| 2024 | 571.9 (540.3–605.3) | 558.2 (527.3–590.8) | 573.8 (542.1–607.3) | 580.1 (548.0–614.0) |
| 2025 | 568.7 (536.4–603.0) | 554.5 (522.9–587.9) | 570.7 (538.2–605.1) | 577.8 (544.9–612.6) |
| 2026 | 565.4 (531.7–601.3) | 550.6 (517.8–585.5) | 567.4 (533.5–603.3) | 575.4 (541.1–611.8) |
| 2027 | 555.2 (521.2–591.5) | 540.1 (507.0–575.3) | 557.1 (523.0–593.5) | 565.9 (531.2–602.8) |
| 2028 | 548.9 (514.1–586.2) | 533.4 (499.5–569.5) | 550.9 (515.9–588.2) | 560.4 (524.8–598.3) |
| 2029 | 545.1 (509.9–582.8) | 529.1 (494.9–565.6) | 547.0 (511.7–584.9) | 557.3 (521.3–595.9) |
| 2030 | 537.2 (502.5–574.4) | 520.8 (487.1–556.8) | 539.1 (504.3–576.4) | 550.1 (514.6–588.2) |
| 2031 | 534.5 (500.0–571.5) | 517.6 (484.1–553.4) | 536.5 (501.8–573.6) | 548.3 (512.8–586.2) |
| 2032 | 535.1 (500.4–572.2) | 517.6 (484.0–553.4) | 537.0 (502.2–574.3) | 549.7 (514.1–587.8) |
| 2033 | 532.0 (497.0–569.5) | 514.0 (480.1–550.2) | 533.9 (498.8–571.6) | 547.4 (511.3–586.0) |
| 2034 | 533.1 (497.6–571.1) | 514.4 (480.2–551.1) | 535.0 (499.5–573.1) | 549.4 (512.8–588.5) |
| 2035 | 536.2 (500.2–574.7) | 516.8 (482.2–554.0) | 538.1 (502.0–576.8) | 553.4 (516.3–593.2) |
| 2036 | 534.3 (498.0–573.2) | 514.4 (479.5–551.9) | 536.3 (499.9–575.4) | 552.4 (514.9–592.6) |
| 2037 | 534.9 (498.5–573.9) | 514.4 (479.5–552.0) | 536.9 (500.4–576.1) | 553.9 (516.2–594.3) |
| 2038 | 536.2 (499.8–575.4) | 515.1 (480.1–552.7) | 538.3 (501.7–577.5) | 556.1 (518.3–596.7) |
| 2039 | 532.1 (495.9–570.9) | 510.5 (475.8–547.8) | 534.1 (497.8–573.1) | 552.7 (515.1–593.0) |

2040      529.8 (493.7–568.6)                      507.8 (473.2–545.0)                      531.8 (495.6–570.8)                      551.2 (513.6–591.6)

| ≥70  |                        |                        |                        |                        |
|------|------------------------|------------------------|------------------------|------------------------|
| Year | Reference              | Scenario 1             | Scenario 2             | Scenario 3             |
| 2017 | 1679.7 (1647.8–1712.3) | 1680.8 (1648.9–1713.4) | 1680.8 (1648.9–1713.4) | 1680.8 (1648.9–1713.4) |
| 2018 | 1665.4 (1621.0–1710.9) | 1662.4 (1618.1–1707.9) | 1665.8 (1621.4–1711.4) | 1667.0 (1622.6–1712.6) |
| 2019 | 1675.6 (1629.6–1723.0) | 1668.6 (1622.8–1715.7) | 1675.4 (1629.4–1722.7) | 1677.8 (1631.7–1725.2) |
| 2020 | 1687.8 (1636.9–1740.3) | 1676.6 (1626.1–1728.7) | 1686.9 (1636.0–1739.3) | 1690.5 (1639.6–1743.1) |
| 2021 | 1683.1 (1631.1–1736.9) | 1668.0 (1616.3–1721.2) | 1681.6 (1629.6–1735.3) | 1686.4 (1634.2–1740.3) |
| 2022 | 1684.3 (1631.6–1738.6) | 1665.0 (1613.0–1718.7) | 1682.0 (1629.5–1736.3) | 1688.1 (1635.3–1742.6) |
| 2023 | 1683.0 (1628.3–1739.5) | 1659.7 (1605.8–1715.4) | 1680.1 (1625.5–1736.5) | 1687.3 (1632.6–1744.0) |
| 2024 | 1662.8 (1606.7–1720.7) | 1637.9 (1582.8–1695.0) | 1659.2 (1603.3–1717.1) | 1667.6 (1611.4–1725.7) |
| 2025 | 1640.4 (1579.9–1703.2) | 1614.1 (1554.6–1675.9) | 1636.3 (1576.0–1698.9) | 1645.7 (1585.0–1708.7) |
| 2026 | 1620.8 (1558.1–1686.1) | 1593.1 (1531.4–1657.2) | 1616.1 (1553.6–1681.2) | 1626.6 (1563.7–1692.1) |
| 2027 | 1593.9 (1532.1–1658.1) | 1564.8 (1504.2–1627.9) | 1588.6 (1527.0–1652.6) | 1600.0 (1538.1–1664.5) |
| 2028 | 1569.4 (1508.6–1632.7) | 1539.1 (1479.5–1601.2) | 1563.6 (1503.0–1626.7) | 1576.0 (1515.0–1639.6) |
| 2029 | 1555.2 (1494.8–1618.0) | 1523.5 (1464.4–1585.0) | 1548.9 (1488.7–1611.4) | 1562.3 (1501.6–1625.4) |
| 2030 | 1539.5 (1477.9–1603.7) | 1506.5 (1446.2–1569.2) | 1532.6 (1471.3–1596.5) | 1547.0 (1485.1–1611.4) |



|      |                        |                        |                        |                        |
|------|------------------------|------------------------|------------------------|------------------------|
| 2031 | 1527.4 (1464.2–1593.3) | 1493.0 (1431.2–1557.4) | 1520.0 (1457.1–1585.6) | 1535.3 (1471.8–1601.6) |
| 2032 | 1523.5 (1459.0–1590.7) | 1487.4 (1424.5–1553.1) | 1515.4 (1451.4–1582.3) | 1531.8 (1467.1–1599.5) |
| 2033 | 1520.4 (1454.9–1588.9) | 1482.8 (1418.9–1549.6) | 1511.8 (1446.7–1579.9) | 1529.3 (1463.4–1598.2) |
| 2034 | 1514.6 (1449.1–1583.1) | 1475.5 (1411.7–1542.2) | 1505.5 (1440.4–1573.5) | 1524.0 (1458.1–1592.9) |
| 2035 | 1508.8 (1443.6–1576.9) | 1468.2 (1404.8–1534.5) | 1499.1 (1434.3–1566.8) | 1518.6 (1452.9–1587.2) |
| 2036 | 1499.2 (1434.1–1567.3) | 1457.3 (1393.9–1523.5) | 1489.0 (1424.3–1556.6) | 1509.4 (1443.8–1578.0) |
| 2037 | 1483.2 (1417.9–1551.5) | 1440.1 (1376.7–1506.4) | 1472.5 (1407.7–1540.3) | 1493.8 (1428.0–1562.6) |
| 2038 | 1464.5 (1398.7–1533.5) | 1420.4 (1356.5–1487.3) | 1453.4 (1388.0–1521.8) | 1475.5 (1409.1–1544.9) |
| 2039 | 1444.3 (1378.4–1513.3) | 1399.2 (1335.4–1466.1) | 1432.7 (1367.4–1501.2) | 1455.5 (1389.1–1525.1) |
| 2040 | 1422.1 (1356.9–1490.3) | 1376.1 (1313.1–1442.2) | 1410.1 (1345.5–1477.8) | 1433.6 (1367.9–1502.4) |

---

All age (2–D)

---

Men

---

| Year | Reference           | Scenario 1          | Scenario 2          | Scenario 3          |
|------|---------------------|---------------------|---------------------|---------------------|
| 2017 | 555.5 (542.3–569.1) | 558.7 (545.5–572.4) | 558.7 (545.5–572.4) | 558.7 (545.5–572.4) |
| 2018 | 561.0 (541.5–581.3) | 560.7 (541.1–581.0) | 564.5 (544.8–584.9) | 565.9 (546.1–586.3) |
| 2019 | 570.3 (543.5–598.5) | 566.1 (539.5–594.1) | 573.9 (546.9–602.2) | 576.6 (549.5–605.1) |
| 2020 | 581.7 (549.8–615.4) | 573.5 (542.1–606.8) | 585.4 (553.3–619.3) | 589.6 (557.3–623.7) |

|      |                     |                     |                     |                     |
|------|---------------------|---------------------|---------------------|---------------------|
| 2021 | 594.3 (558.7–632.3) | 582.1 (547.2–619.2) | 598.1 (562.2–636.3) | 603.9 (567.6–642.4) |
| 2022 | 607.3 (569.3–647.8) | 590.7 (553.8–630.1) | 611.2 (573.0–651.9) | 618.5 (579.9–659.8) |
| 2023 | 619.7 (580.4–661.7) | 598.8 (560.8–639.3) | 623.7 (584.1–665.9) | 632.7 (592.6–675.6) |
| 2024 | 631.1 (591.0–673.9) | 609.1 (570.4–650.5) | 635.1 (594.8–678.2) | 645.9 (604.9–689.7) |
| 2025 | 641.0 (600.2–684.5) | 618.1 (578.8–660.0) | 645.2 (604.2–688.9) | 657.7 (615.9–702.3) |
| 2026 | 649.4 (607.9–693.7) | 625.6 (585.6–668.2) | 653.7 (611.9–698.2) | 667.9 (625.3–713.5) |
| 2027 | 656.4 (614.1–701.6) | 631.7 (591.0–675.2) | 660.7 (618.2–706.2) | 676.8 (633.2–723.4) |
| 2028 | 662.3 (619.2–708.5) | 636.7 (595.3–681.1) | 666.7 (623.3–713.2) | 684.6 (640.0–732.2) |
| 2029 | 667.5 (623.6–714.5) | 641.1 (598.9–686.2) | 672.0 (627.8–719.3) | 691.6 (646.1–740.3) |
| 2030 | 672.3 (627.8–720.0) | 645.0 (602.3–690.8) | 676.9 (632.0–724.9) | 698.3 (652.1–747.8) |
| 2031 | 677.2 (632.2–725.4) | 649.0 (605.9–695.2) | 681.8 (636.5–730.3) | 705.0 (658.2–755.2) |
| 2032 | 682.3 (636.9–730.9) | 653.3 (609.8–699.9) | 687.0 (641.2–735.9) | 712.1 (664.7–762.9) |
| 2033 | 687.9 (642.1–737.0) | 658.0 (614.2–705.0) | 692.7 (646.6–742.1) | 719.8 (671.8–771.1) |
| 2034 | 694.2 (648.0–743.7) | 663.3 (619.2–710.6) | 699.0 (652.5–748.8) | 728.1 (679.6–780.0) |
| 2035 | 701.1 (654.4–751.1) | 669.2 (624.7–717.0) | 705.9 (658.9–756.3) | 737.1 (688.0–789.7) |
| 2036 | 708.5 (661.3–759.1) | 675.7 (630.6–723.9) | 713.5 (665.9–764.5) | 746.8 (697.0–800.1) |
| 2037 | 716.5 (668.7–767.7) | 682.6 (637.0–731.4) | 721.6 (673.4–773.1) | 757.0 (706.5–811.1) |
| 2038 | 724.8 (676.4–776.7) | 689.8 (643.8–739.2) | 730.0 (681.2–782.2) | 767.7 (716.4–822.6) |
| 2039 | 733.4 (684.4–785.9) | 697.3 (650.7–747.2) | 738.7 (689.3–791.6) | 778.7 (726.6–834.5) |

|      |                     |                     |                     |                     |
|------|---------------------|---------------------|---------------------|---------------------|
| 2040 | 742.1 (692.5–795.3) | 704.9 (657.7–755.4) | 747.5 (697.5–801.0) | 789.8 (737.0–846.4) |
|------|---------------------|---------------------|---------------------|---------------------|

| Women |                     |                     |                     |                     |
|-------|---------------------|---------------------|---------------------|---------------------|
| Year  | Reference           | Scenario 1          | Scenario 2          | Scenario 3          |
| 2017  | 483.7 (474.4–493.1) | 484.0 (474.7–493.5) | 484.0 (474.7–493.5) | 484.0 (474.7–493.5) |
| 2018  | 486.7 (475.4–498.2) | 486.8 (475.6–498.4) | 487.1 (475.8–498.6) | 487.2 (475.9–498.7) |
| 2019  | 490.0 (477.9–502.5) | 490.0 (477.9–502.5) | 490.6 (478.4–503.0) | 490.7 (478.6–503.2) |
| 2020  | 493.3 (480.8–506.2) | 493.2 (480.6–506.1) | 493.9 (481.4–506.8) | 494.2 (481.6–507.1) |
| 2021  | 496.7 (483.9–509.9) | 496.4 (483.6–509.5) | 497.4 (484.6–510.6) | 497.8 (485.0–511.0) |
| 2022  | 500.1 (487.2–513.4) | 499.7 (486.7–512.9) | 500.9 (488.0–514.3) | 501.4 (488.4–514.7) |
| 2023  | 503.6 (490.5–517.0) | 502.9 (489.9–516.3) | 504.5 (491.4–517.9) | 505.0 (491.9–518.5) |
| 2024  | 507.1 (493.9–520.6) | 506.3 (493.1–519.8) | 508.1 (494.8–521.6) | 508.7 (495.5–522.3) |
| 2025  | 510.6 (497.3–524.2) | 509.7 (496.4–523.3) | 511.7 (498.4–525.3) | 512.4 (499.1–526.1) |
| 2026  | 514.1 (500.7–527.9) | 513.1 (499.7–526.8) | 515.3 (501.9–529.1) | 516.2 (502.7–529.9) |
| 2027  | 517.7 (504.2–531.5) | 516.5 (503.0–530.3) | 519.0 (505.5–532.8) | 519.9 (506.4–533.8) |
| 2028  | 521.3 (507.7–535.2) | 519.9 (506.4–533.8) | 522.7 (509.1–536.6) | 523.7 (510.1–537.7) |
| 2029  | 524.9 (511.2–538.9) | 523.4 (509.8–537.4) | 526.4 (512.7–540.5) | 527.5 (513.8–541.6) |
| 2030  | 528.5 (514.8–542.7) | 526.9 (513.2–541.0) | 530.1 (516.3–544.3) | 531.4 (517.5–545.6) |

|      |                     |                     |                     |                     |
|------|---------------------|---------------------|---------------------|---------------------|
| 2031 | 532.2 (518.4–546.4) | 530.4 (516.6–544.6) | 533.9 (520.0–548.2) | 535.3 (521.3–549.6) |
| 2032 | 535.9 (522.0–550.2) | 533.9 (520.0–548.2) | 537.7 (523.7–552.1) | 539.2 (525.1–553.6) |
| 2033 | 539.6 (525.6–554.1) | 537.5 (523.5–551.9) | 541.5 (527.4–556.0) | 543.1 (529.0–557.6) |
| 2034 | 543.4 (529.2–557.9) | 541.1 (527.0–555.6) | 545.4 (531.2–560.0) | 547.1 (532.8–561.7) |
| 2035 | 547.2 (532.9–561.8) | 544.7 (530.5–559.3) | 549.3 (535.0–564.0) | 551.1 (536.7–565.8) |
| 2036 | 550.9 (536.6–565.7) | 548.4 (534.1–563.0) | 553.2 (538.8–568.0) | 555.1 (540.6–569.9) |
| 2037 | 554.8 (540.3–569.6) | 552.0 (537.6–566.8) | 557.1 (542.6–572.0) | 559.1 (544.6–574.1) |
| 2038 | 558.6 (544.1–573.6) | 555.7 (541.2–570.6) | 561.1 (546.5–576.1) | 563.2 (548.6–578.3) |
| 2039 | 562.5 (547.9–577.5) | 559.4 (544.9–574.4) | 565.1 (550.4–580.2) | 567.3 (552.6–582.5) |
| 2040 | 566.4 (551.7–581.6) | 563.2 (548.5–578.2) | 569.1 (554.3–584.3) | 571.5 (556.6–586.8) |

---

Both sexes combined

| Year | Reference           | Scenario 1          | Scenario 2          | Scenario 3          |
|------|---------------------|---------------------|---------------------|---------------------|
| 2017 | 526.2 (516.8–535.9) | 527.3 (517.8–537.0) | 527.3 (517.8–537.0) | 527.3 (517.8–537.0) |
| 2018 | 533.3 (522.0–544.8) | 533.4 (522.1–544.9) | 534.5 (523.2–546.1) | 534.9 (523.6–546.5) |
| 2019 | 544.2 (533.6–555.0) | 543.3 (532.7–554.1) | 545.6 (535.0–556.4) | 546.4 (535.7–557.2) |
| 2020 | 557.3 (545.8–569.0) | 555.4 (544.0–567.1) | 558.9 (547.4–570.6) | 560.1 (548.6–571.9) |
| 2021 | 564.5 (553.2–576.1) | 561.7 (550.4–573.2) | 566.3 (555.0–577.9) | 568.0 (556.6–579.6) |

|      |                     |                     |                     |                     |
|------|---------------------|---------------------|---------------------|---------------------|
| 2022 | 564.8 (551.9–578.1) | 561.0 (548.1–574.1) | 566.8 (553.8–580.1) | 568.9 (555.8–582.2) |
| 2023 | 570.6 (557.2–584.2) | 565.6 (552.4–579.2) | 572.7 (559.3–586.4) | 575.2 (561.8–589.0) |
| 2024 | 567.0 (554.0–580.2) | 561.8 (549.0–574.9) | 569.2 (556.3–582.5) | 572.2 (559.1–585.5) |
| 2025 | 561.7 (547.8–575.9) | 556.3 (542.5–570.4) | 564.1 (550.2–578.4) | 567.4 (553.4–581.8) |
| 2026 | 562.0 (548.7–575.6) | 556.3 (543.1–569.8) | 564.6 (551.2–578.3) | 568.3 (554.8–582.1) |
| 2027 | 564.3 (549.7–579.3) | 558.3 (543.8–573.1) | 567.0 (552.4–582.1) | 571.2 (556.4–586.4) |
| 2028 | 566.1 (551.5–581.2) | 559.8 (545.3–574.7) | 569.1 (554.3–584.2) | 573.6 (558.8–588.9) |
| 2029 | 578.7 (563.2–594.6) | 571.9 (556.6–587.7) | 581.8 (566.3–597.8) | 587.0 (571.2–603.1) |
| 2030 | 589.5 (572.8–606.7) | 582.3 (565.8–599.3) | 592.8 (576.1–610.1) | 598.5 (581.5–615.9) |
| 2031 | 598.0 (581.8–614.8) | 590.4 (574.4–606.9) | 601.6 (585.3–618.4) | 607.8 (591.3–624.8) |
| 2032 | 608.7 (592.0–625.9) | 600.7 (584.2–617.7) | 612.6 (595.7–629.9) | 619.3 (602.3–636.8) |
| 2033 | 616.2 (599.2–633.6) | 607.7 (590.9–624.9) | 620.2 (603.1–637.8) | 627.5 (610.2–645.3) |
| 2034 | 614.3 (596.2–632.9) | 605.5 (587.7–623.9) | 618.5 (600.3–637.2) | 626.2 (607.8–645.2) |
| 2035 | 615.3 (596.7–634.4) | 606.2 (587.9–625.0) | 619.7 (601.0–638.9) | 627.8 (608.9–647.4) |
| 2036 | 613.5 (595.4–632.1) | 604.1 (586.3–622.4) | 618.0 (599.8–636.8) | 626.7 (608.2–645.7) |
| 2037 | 609.5 (591.4–628.2) | 599.9 (582.1–618.3) | 614.2 (596.0–633.0) | 623.2 (604.7–642.3) |
| 2038 | 611.4 (593.2–630.2) | 601.5 (583.6–619.9) | 616.3 (598.0–635.2) | 625.8 (607.2–645.0) |
| 2039 | 618.4 (599.0–638.3) | 608.0 (589.0–627.6) | 623.5 (604.0–643.6) | 633.6 (613.8–654.0) |

2040      623.7 (604.1–643.9)                      612.9 (593.7–632.7)                      629.0 (609.3–649.4)                      639.7 (619.6–660.4)

| Stomach cancer (3) |                     |                     |                     |                     |
|--------------------|---------------------|---------------------|---------------------|---------------------|
| Men (3-A)          |                     |                     |                     |                     |
| 20–49              |                     |                     |                     |                     |
| Year               | Reference           | Scenario 1          | Scenario 2          | Scenario 3          |
| 2017               | 107.6 (104.3–111.0) | 109.2 (105.9–112.7) | 109.2 (105.9–112.7) | 109.2 (105.9–112.7) |
| 2018               | 102.0 (97.0–107.2)  | 101.0 (96.0–106.2)  | 104.7 (99.6–110.1)  | 106.0 (100.8–111.5) |
| 2019               | 96.6 (91.9–101.6)   | 92.7 (88.2–97.5)    | 99.7 (94.8–104.8)   | 102.3 (97.3–107.5)  |
| 2020               | 89.6 (84.9–94.6)    | 83.3 (79.0–88.0)    | 92.9 (88.0–98.1)    | 96.6 (91.5–101.9)   |
| 2021               | 89.5 (84.7–94.5)    | 80.7 (76.4–85.2)    | 93.3 (88.3–98.5)    | 98.2 (93.0–103.7)   |
| 2022               | 87.9 (82.7–93.4)    | 76.8 (72.3–81.6)    | 92.1 (86.7–97.8)    | 98.2 (92.4–104.3)   |
| 2023               | 83.8 (78.9–89.1)    | 71.0 (66.8–75.5)    | 88.3 (83.0–93.9)    | 95.3 (89.7–101.3)   |
| 2024               | 82.2 (77.1–87.7)    | 69.4 (65.0–74.0)    | 87.0 (81.6–92.8)    | 95.1 (89.2–101.5)   |
| 2025               | 79.1 (74.0–84.4)    | 66.5 (62.2–71.0)    | 84.1 (78.7–89.8)    | 93.1 (87.2–99.4)    |
| 2026               | 74.3 (69.5–79.4)    | 62.2 (58.2–66.5)    | 79.4 (74.3–84.9)    | 89.1 (83.4–95.2)    |
| 2027               | 71.6 (67.0–76.5)    | 59.7 (55.9–63.8)    | 76.9 (71.9–82.2)    | 87.4 (81.7–93.4)    |
| 2028               | 69.8 (65.2–74.7)    | 58.0 (54.1–62.1)    | 75.3 (70.3–80.7)    | 86.7 (81.0–92.9)    |

|      |                  |                  |                  |                  |
|------|------------------|------------------|------------------|------------------|
| 2029 | 69.3 (64.7–74.2) | 57.4 (53.6–61.4) | 75.2 (70.3–80.6) | 87.7 (81.9–93.9) |
| 2030 | 67.6 (63.2–72.4) | 55.8 (52.1–59.7) | 73.8 (68.9–79.0) | 87.1 (81.3–93.3) |
| 2031 | 63.4 (59.1–68.1) | 52.1 (48.5–55.9) | 69.5 (64.8–74.6) | 83.1 (77.5–89.2) |
| 2032 | 60.4 (56.3–64.8) | 49.4 (46.0–53.0) | 66.5 (62.0–71.4) | 80.6 (75.1–86.5) |
| 2033 | 58.7 (54.5–63.1) | 47.8 (44.4–51.4) | 64.9 (60.4–69.8) | 79.7 (74.1–85.7) |
| 2034 | 56.5 (52.5–60.8) | 45.9 (42.7–49.3) | 62.9 (58.5–67.6) | 78.1 (72.7–84.0) |
| 2035 | 54.8 (51.0–59.0) | 44.3 (41.2–47.7) | 61.3 (57.0–65.9) | 77.2 (71.8–83.0) |
| 2036 | 54.2 (50.4–58.3) | 43.6 (40.6–46.9) | 60.9 (56.6–65.5) | 77.6 (72.2–83.5) |
| 2037 | 52.4 (48.7–56.4) | 42.1 (39.1–45.2) | 59.2 (55.0–63.7) | 76.5 (71.1–82.3) |
| 2038 | 49.2 (45.7–52.9) | 39.3 (36.5–42.3) | 55.9 (51.9–60.1) | 73.1 (67.9–78.6) |
| 2039 | 46.7 (43.4–50.2) | 37.1 (34.5–39.9) | 53.2 (49.5–57.3) | 70.5 (65.6–75.9) |
| 2040 | 45.5 (42.3–49.0) | 36.1 (33.5–38.9) | 52.2 (48.5–56.2) | 70.1 (65.1–75.5) |

---

50–69

| Year | Reference              | Scenario 1             | Scenario 2             | Scenario 3             |
|------|------------------------|------------------------|------------------------|------------------------|
| 2017 | 1399.7 (1353.2–1447.8) | 1418.9 (1371.7–1467.6) | 1418.9 (1371.7–1467.6) | 1418.9 (1371.7–1467.6) |
| 2018 | 1369.9 (1324.4–1417.0) | 1352.7 (1307.7–1399.2) | 1386.2 (1340.1–1433.8) | 1398.2 (1351.7–1446.3) |
| 2019 | 1339.6 (1295.1–1385.6) | 1288.4 (1245.6–1332.7) | 1353.0 (1308.1–1399.5) | 1376.6 (1330.9–1423.9) |

|      |                        |                        |                        |                        |
|------|------------------------|------------------------|------------------------|------------------------|
| 2020 | 1310.7 (1267.1–1355.7) | 1227.9 (1187.1–1270.1) | 1321.4 (1277.5–1366.8) | 1356.1 (1311.0–1402.7) |
| 2021 | 1281.9 (1239.3–1326.0) | 1169.8 (1130.9–1210.0) | 1290.1 (1247.2–1334.5) | 1335.5 (1291.1–1381.4) |
| 2022 | 1254.0 (1212.3–1297.1) | 1114.6 (1077.5–1152.9) | 1259.7 (1217.8–1303.0) | 1315.3 (1271.6–1360.5) |
| 2023 | 1226.6 (1185.9–1268.8) | 1062.0 (1026.7–1098.5) | 1230.0 (1189.1–1272.3) | 1295.4 (1252.4–1339.9) |
| 2024 | 1199.9 (1160.0–1241.1) | 1034.6 (1000.2–1070.2) | 1200.9 (1161.0–1242.2) | 1275.8 (1233.4–1319.7) |
| 2025 | 1173.7 (1134.7–1214.0) | 1008.0 (974.5–1042.6)  | 1172.6 (1133.6–1212.9) | 1256.5 (1214.8–1299.7) |
| 2026 | 1148.1 (1109.9–1187.6) | 982.0 (949.4–1015.7)   | 1144.9 (1106.9–1184.3) | 1237.5 (1196.4–1280.0) |
| 2027 | 1123.0 (1085.7–1161.6) | 956.7 (924.9–989.6)    | 1117.9 (1080.8–1156.4) | 1218.8 (1178.3–1260.7) |
| 2028 | 1098.5 (1062.0–1136.3) | 932.0 (901.1–964.1)    | 1091.6 (1055.3–1129.1) | 1200.4 (1160.5–1241.6) |
| 2029 | 1074.6 (1038.9–1111.5) | 908.0 (877.8–939.2)    | 1065.8 (1030.4–1102.4) | 1182.2 (1142.9–1222.8) |
| 2030 | 1051.1 (1016.2–1087.3) | 884.6 (855.2–915.0)    | 1040.6 (1006.1–1076.4) | 1164.3 (1125.6–1204.3) |
| 2031 | 1028.2 (994.0–1063.5)  | 861.8 (833.2–891.4)    | 1016.1 (982.3–1051.0)  | 1146.7 (1108.6–1186.1) |
| 2032 | 1005.8 (972.4–1040.3)  | 839.6 (811.7–868.5)    | 992.1 (959.2–1026.2)   | 1129.4 (1091.8–1168.2) |
| 2033 | 983.8 (951.1–1017.6)   | 818.0 (790.8–846.1)    | 968.7 (936.5–1002.0)   | 1112.3 (1075.3–1150.5) |
| 2034 | 962.4 (930.4–995.4)    | 796.9 (770.4–824.3)    | 945.9 (914.4–978.4)    | 1095.5 (1059.1–1133.1) |
| 2035 | 941.4 (910.1–973.7)    | 776.4 (750.6–803.0)    | 923.5 (892.8–955.3)    | 1078.9 (1043.1–1116.0) |
| 2036 | 920.8 (890.2–952.5)    | 756.4 (731.2–782.4)    | 901.7 (871.8–932.7)    | 1062.6 (1027.3–1099.1) |
| 2037 | 900.7 (870.8–931.7)    | 736.9 (712.4–762.2)    | 880.5 (851.2–910.7)    | 1046.5 (1011.7–1082.5) |
| 2038 | 881.1 (851.8–911.4)    | 717.9 (694.0–742.6)    | 859.7 (831.1–889.2)    | 1030.7 (996.4–1066.1)  |



|      |                     |                     |                     |                       |
|------|---------------------|---------------------|---------------------|-----------------------|
| 2039 | 861.9 (833.2–891.5) | 699.4 (676.1–723.4) | 839.4 (811.5–868.3) | 1015.1 (981.4–1050.0) |
| 2040 | 843.1 (815.1–872.0) | 681.4 (658.7–704.8) | 819.6 (792.4–847.8) | 999.8 (966.5–1034.1)  |

| ≥70  |                        |                        |                        |                        |
|------|------------------------|------------------------|------------------------|------------------------|
| Year | Reference              | Scenario 1             | Scenario 2             | Scenario 3             |
| 2017 | 3011.4 (2924.3–3101.0) | 3015.6 (2928.5–3105.4) | 3015.6 (2928.5–3105.4) | 3015.6 (2928.5–3105.4) |
| 2018 | 2967.1 (2867.5–3070.2) | 2952.4 (2853.2–3054.9) | 2967.9 (2868.3–3071.0) | 2973.4 (2873.6–3076.7) |
| 2019 | 2832.4 (2709.4–2961.1) | 2800.4 (2678.8–2927.6) | 2830.0 (2707.0–2958.5) | 2840.5 (2717.1–2969.4) |
| 2020 | 2832.5 (2708.8–2961.9) | 2782.6 (2661.1–2909.7) | 2826.8 (2703.4–2955.9) | 2842.6 (2718.4–2972.3) |
| 2021 | 2774.0 (2633.8–2921.7) | 2707.8 (2570.9–2851.9) | 2765.2 (2625.5–2912.4) | 2785.8 (2645.0–2934.1) |
| 2022 | 2772.9 (2625.7–2928.3) | 2689.5 (2546.7–2840.2) | 2761.0 (2614.4–2915.7) | 2786.7 (2638.8–2942.8) |
| 2023 | 2709.8 (2534.6–2897.1) | 2611.5 (2442.6–2792.0) | 2695.0 (2520.8–2881.3) | 2725.2 (2549.0–2913.5) |
| 2024 | 2675.5 (2487.9–2877.2) | 2573.3 (2392.9–2767.4) | 2657.9 (2471.5–2858.3) | 2692.6 (2503.8–2895.6) |
| 2025 | 2604.2 (2412.3–2811.3) | 2499.8 (2315.6–2698.6) | 2584.1 (2393.6–2789.6) | 2622.6 (2429.4–2831.3) |
| 2026 | 2598.9 (2403.8–2809.8) | 2489.8 (2302.9–2691.8) | 2575.9 (2382.5–2784.9) | 2619.2 (2422.6–2831.7) |
| 2027 | 2591.3 (2388.2–2811.6) | 2477.6 (2283.5–2688.2) | 2565.4 (2364.4–2783.5) | 2613.4 (2408.6–2835.6) |
| 2028 | 2570.5 (2366.0–2792.6) | 2452.8 (2257.7–2664.8) | 2541.9 (2339.7–2761.5) | 2594.2 (2387.9–2818.3) |
| 2029 | 2534.3 (2327.2–2759.9) | 2413.6 (2216.3–2628.4) | 2503.3 (2298.6–2726.1) | 2559.5 (2350.3–2787.4) |

|      |                        |                        |                        |                        |
|------|------------------------|------------------------|------------------------|------------------------|
| 2030 | 2494.0 (2286.3–2720.7) | 2370.5 (2173.0–2585.9) | 2460.7 (2255.7–2684.3) | 2520.6 (2310.7–2749.7) |
| 2031 | 2461.9 (2256.3–2686.4) | 2335.4 (2140.2–2548.3) | 2426.2 (2223.5–2647.4) | 2490.0 (2281.9–2717.0) |
| 2032 | 2439.6 (2236.1–2661.6) | 2309.6 (2116.9–2519.7) | 2401.4 (2201.1–2619.9) | 2469.1 (2263.1–2693.8) |
| 2033 | 2444.2 (2239.6–2667.5) | 2309.4 (2116.0–2520.4) | 2403.2 (2202.0–2622.8) | 2475.5 (2268.2–2701.7) |
| 2034 | 2406.1 (2204.8–2625.7) | 2268.9 (2079.1–2476.0) | 2363.0 (2165.4–2578.7) | 2438.6 (2234.6–2661.2) |
| 2035 | 2368.1 (2170.2–2584.1) | 2228.6 (2042.3–2431.9) | 2323.0 (2128.9–2534.9) | 2401.8 (2201.1–2620.9) |
| 2036 | 2320.1 (2126.0–2532.1) | 2179.2 (1996.8–2378.2) | 2273.4 (2083.1–2481.1) | 2354.8 (2157.8–2569.9) |
| 2037 | 2295.6 (2100.2–2509.1) | 2151.8 (1968.7–2352.0) | 2246.7 (2055.5–2455.8) | 2331.5 (2133.1–2548.4) |
| 2038 | 2260.4 (2064.5–2474.8) | 2114.7 (1931.4–2315.3) | 2209.8 (2018.3–2419.4) | 2297.4 (2098.3–2515.4) |
| 2039 | 2246.6 (2049.4–2462.8) | 2097.6 (1913.5–2299.5) | 2193.8 (2001.2–2405.0) | 2285.1 (2084.4–2505.0) |
| 2040 | 2200.5 (2006.1–2413.7) | 2050.5 (1869.4–2249.1) | 2146.3 (1956.7–2354.2) | 2239.7 (2041.9–2456.7) |

---

Women (3–B)

---

20–49

---

| Year | Reference         | Scenario 1         | Scenario 2         | Scenario 3         |
|------|-------------------|--------------------|--------------------|--------------------|
| 2017 | 97.7 (95.0–100.4) | 101.0 (98.3–103.8) | 101.0 (98.3–103.8) | 101.0 (98.3–103.8) |
| 2018 | 93.7 (89.9–97.7)  | 97.4 (93.4–101.5)  | 98.2 (94.2–102.4)  | 98.5 (94.5–102.7)  |
| 2019 | 91.0 (87.2–95.1)  | 95.1 (91.1–99.3)   | 96.7 (92.6–101.0)  | 97.3 (93.2–101.7)  |

|      |                  |                  |                  |                  |
|------|------------------|------------------|------------------|------------------|
| 2020 | 87.8 (83.9–91.9) | 92.2 (88.1–96.5) | 94.6 (90.4–99.0) | 95.4 (91.2–99.9) |
| 2021 | 83.6 (79.9–87.6) | 88.3 (84.3–92.4) | 91.4 (87.2–95.7) | 92.5 (88.3–96.8) |
| 2022 | 80.1 (76.5–83.9) | 85.0 (81.2–89.0) | 88.7 (84.7–92.9) | 90.1 (86.0–94.3) |
| 2023 | 77.4 (73.9–81.0) | 82.5 (78.8–86.4) | 86.9 (82.9–91.0) | 88.5 (84.5–92.6) |
| 2024 | 74.9 (71.6–78.5) | 79.5 (75.9–83.2) | 85.3 (81.4–89.3) | 87.1 (83.2–91.2) |
| 2025 | 72.7 (69.3–76.2) | 76.6 (73.1–80.3) | 83.8 (80.0–87.9) | 85.9 (81.9–90.0) |
| 2026 | 70.3 (67.0–73.7) | 73.7 (70.3–77.3) | 82.2 (78.4–86.2) | 84.5 (80.6–88.6) |
| 2027 | 67.6 (64.5–70.9) | 70.6 (67.3–74.0) | 80.2 (76.5–84.0) | 82.6 (78.8–86.6) |
| 2028 | 64.8 (61.8–68.0) | 67.3 (64.2–70.6) | 77.9 (74.3–81.7) | 80.6 (76.8–84.5) |
| 2029 | 62.2 (59.3–65.3) | 64.3 (61.3–67.4) | 75.9 (72.3–79.6) | 78.7 (75.0–82.5) |
| 2030 | 60.0 (57.2–63.0) | 61.7 (58.8–64.7) | 74.2 (70.7–77.8) | 77.1 (73.6–80.9) |
| 2031 | 58.1 (55.4–61.0) | 59.4 (56.6–62.3) | 72.8 (69.4–76.3) | 75.9 (72.4–79.7) |
| 2032 | 56.3 (53.7–59.1) | 57.2 (54.5–60.0) | 71.5 (68.1–75.0) | 74.8 (71.3–78.5) |
| 2033 | 54.4 (51.9–57.1) | 55.0 (52.4–57.7) | 70.0 (66.7–73.5) | 73.5 (70.1–77.1) |
| 2034 | 52.4 (49.9–54.9) | 52.7 (50.2–55.3) | 68.3 (65.1–71.7) | 72.0 (68.6–75.5) |
| 2035 | 50.3 (47.9–52.8) | 50.3 (47.9–52.8) | 66.5 (63.4–69.8) | 70.3 (67.0–73.8) |
| 2036 | 48.4 (46.1–50.8) | 48.1 (45.8–50.5) | 64.9 (61.8–68.1) | 68.7 (65.5–72.1) |
| 2037 | 46.6 (44.4–49.0) | 46.2 (44.0–48.5) | 63.4 (60.4–66.6) | 67.4 (64.2–70.7) |
| 2038 | 45.1 (43.0–47.4) | 44.4 (42.3–46.6) | 62.2 (59.2–65.3) | 66.3 (63.2–69.6) |

|      |                  |                  |                  |                  |
|------|------------------|------------------|------------------|------------------|
| 2039 | 43.7 (41.6–45.8) | 42.8 (40.7–44.9) | 61.0 (58.1–64.0) | 65.2 (62.1–68.5) |
| 2040 | 42.2 (40.2–44.3) | 41.1 (39.1–43.1) | 59.7 (56.9–62.7) | 64.1 (61.0–67.3) |

| 50–69 |                     |                     |                     |                     |
|-------|---------------------|---------------------|---------------------|---------------------|
| Year  | Reference           | Scenario 1          | Scenario 2          | Scenario 3          |
| 2017  | 476.3 (464.6–488.3) | 480.2 (468.4–492.3) | 480.2 (468.4–492.3) | 480.2 (468.4–492.3) |
| 2018  | 456.2 (448.4–464.0) | 456.7 (449.0–464.6) | 460.4 (452.6–468.3) | 461.7 (453.9–469.6) |
| 2019  | 455.7 (444.2–467.6) | 453.2 (441.7–465.0) | 460.5 (448.8–472.5) | 463.1 (451.4–475.1) |
| 2020  | 447.6 (436.6–458.8) | 442.0 (431.2–453.1) | 452.7 (441.7–464.1) | 456.6 (445.4–468.1) |
| 2021  | 423.7 (411.9–435.7) | 415.6 (404.1–427.4) | 429.1 (417.2–441.3) | 434.0 (421.9–446.3) |
| 2022  | 407.2 (396.6–418.2) | 396.7 (386.4–407.4) | 412.9 (402.2–424.0) | 418.8 (407.9–430.0) |
| 2023  | 399.0 (384.9–413.7) | 386.1 (372.5–400.3) | 405.1 (390.8–419.9) | 412.0 (397.5–427.1) |
| 2024  | 391.1 (377.4–405.3) | 377.1 (363.9–390.9) | 397.5 (383.5–412.0) | 405.4 (391.2–420.2) |
| 2025  | 379.8 (366.6–393.5) | 365.0 (352.3–378.1) | 386.5 (373.1–400.4) | 395.3 (381.6–409.6) |
| 2026  | 380.6 (366.6–395.1) | 364.5 (351.1–378.4) | 387.7 (373.5–402.5) | 397.7 (383.1–412.9) |
| 2027  | 371.6 (357.9–385.9) | 354.7 (341.6–368.3) | 379.0 (365.0–393.6) | 389.9 (375.5–404.9) |
| 2028  | 352.0 (338.7–365.8) | 334.8 (322.2–347.9) | 359.5 (345.9–373.5) | 370.8 (356.8–385.3) |
| 2029  | 349.5 (336.3–363.3) | 331.3 (318.7–344.4) | 357.4 (343.8–371.5) | 369.7 (355.6–384.3) |

|      |                     |                     |                     |                     |
|------|---------------------|---------------------|---------------------|---------------------|
| 2030 | 336.8 (323.2–350.9) | 318.1 (305.3–331.4) | 344.7 (330.8–359.1) | 357.6 (343.2–372.6) |
| 2031 | 321.2 (308.4–334.6) | 302.4 (290.3–315.0) | 329.2 (316.0–342.9) | 342.5 (328.8–356.7) |
| 2032 | 321.1 (308.2–334.5) | 301.2 (289.1–313.8) | 329.4 (316.2–343.2) | 343.7 (329.9–358.1) |
| 2033 | 312.7 (300.1–325.8) | 292.3 (280.6–304.6) | 321.2 (308.3–334.7) | 336.0 (322.5–350.1) |
| 2034 | 303.9 (291.5–316.9) | 283.2 (271.6–295.3) | 312.6 (299.8–325.9) | 328.0 (314.6–341.9) |
| 2035 | 300.3 (288.1–313.1) | 278.9 (267.5–290.8) | 309.2 (296.6–322.4) | 325.4 (312.1–339.2) |
| 2036 | 292.2 (280.2–304.7) | 270.4 (259.3–282.0) | 301.2 (288.9–314.1) | 317.8 (304.8–331.4) |
| 2037 | 279.6 (268.0–291.7) | 257.9 (247.2–269.0) | 288.6 (276.6–301.1) | 305.3 (292.7–318.6) |
| 2038 | 270.4 (259.2–282.2) | 248.6 (238.2–259.3) | 279.4 (267.8–291.5) | 296.5 (284.2–309.4) |
| 2039 | 266.5 (255.2–278.4) | 244.1 (233.7–255.0) | 275.7 (264.0–288.0) | 293.4 (280.9–306.5) |
| 2040 | 257.9 (246.9–269.4) | 235.4 (225.4–245.9) | 267.1 (255.7–279.0) | 285.0 (272.9–297.7) |

≥70

| Year | Reference            | Scenario 1           | Scenario 2           | Scenario 3           |
|------|----------------------|----------------------|----------------------|----------------------|
| 2017 | 986.5 (963.0–1010.6) | 987.9 (964.4–1012.1) | 987.9 (964.4–1012.1) | 987.9 (964.4–1012.1) |
| 2018 | 968.9 (944.4–994.1)  | 966.5 (942.1–991.6)  | 969.8 (945.3–995.0)  | 971.0 (946.4–996.2)  |
| 2019 | 940.9 (916.6–965.8)  | 934.9 (910.8–959.7)  | 941.3 (917.0–966.2)  | 943.6 (919.2–968.6)  |
| 2020 | 926.3 (902.0–951.2)  | 916.9 (892.8–941.5)  | 926.3 (902.0–951.2)  | 929.6 (905.2–954.6)  |

|      |                     |                     |                     |                     |
|------|---------------------|---------------------|---------------------|---------------------|
| 2021 | 905.0 (876.2–934.7) | 892.3 (863.9–921.6) | 904.5 (875.7–934.2) | 908.9 (880.0–938.7) |
| 2022 | 870.4 (837.9–904.1) | 854.8 (823.0–887.9) | 869.5 (837.1–903.2) | 874.7 (842.1–908.6) |
| 2023 | 868.4 (835.2–902.9) | 849.6 (817.2–883.3) | 867.1 (834.0–901.5) | 873.4 (840.0–908.0) |
| 2024 | 845.9 (813.5–879.6) | 825.4 (793.8–858.3) | 844.2 (811.9–877.9) | 851.4 (818.8–885.3) |
| 2025 | 809.5 (778.2–842.1) | 787.8 (757.2–819.5) | 807.5 (776.2–840.0) | 815.3 (783.7–848.2) |
| 2026 | 799.4 (767.5–832.7) | 775.9 (744.8–808.2) | 797.1 (765.2–830.3) | 805.7 (773.5–839.3) |
| 2027 | 769.9 (738.3–803.0) | 745.3 (714.6–777.2) | 767.3 (735.8–800.2) | 776.6 (744.6–809.9) |
| 2028 | 745.5 (715.0–777.3) | 719.7 (690.3–750.3) | 742.6 (712.2–774.2) | 752.4 (721.7–784.5) |
| 2029 | 739.9 (709.5–771.6) | 712.4 (683.1–742.9) | 736.6 (706.4–768.2) | 747.3 (716.6–779.4) |
| 2030 | 726.8 (696.2–758.7) | 697.9 (668.5–728.5) | 723.2 (692.8–755.0) | 734.6 (703.7–766.9) |
| 2031 | 709.8 (680.2–740.6) | 679.7 (651.4–709.3) | 706.0 (676.6–736.6) | 717.9 (688.1–749.1) |
| 2032 | 693.5 (664.8–723.5) | 662.4 (634.9–691.1) | 689.5 (660.9–719.3) | 702.0 (672.9–732.4) |
| 2033 | 679.5 (650.9–709.4) | 647.3 (620.0–675.7) | 675.2 (646.8–704.9) | 688.3 (659.3–718.6) |
| 2034 | 653.9 (624.3–684.8) | 621.2 (593.1–650.6) | 649.4 (620.0–680.2) | 662.8 (632.8–694.2) |
| 2035 | 637.0 (608.1–667.3) | 603.6 (576.2–632.2) | 632.4 (603.7–662.4) | 646.2 (616.9–676.9) |
| 2036 | 630.5 (601.9–660.5) | 595.8 (568.8–624.2) | 625.6 (597.2–655.4) | 640.1 (611.0–670.5) |
| 2037 | 606.4 (578.4–635.7) | 571.5 (545.1–599.1) | 601.4 (573.6–630.4) | 616.0 (587.6–645.7) |
| 2038 | 593.3 (565.1–622.9) | 557.7 (531.1–585.5) | 588.1 (560.1–617.5) | 603.1 (574.4–633.3) |
| 2039 | 583.5 (555.1–613.5) | 547.0 (520.3–575.1) | 578.1 (549.9–607.8) | 593.6 (564.7–624.1) |

2040      561.3 (534.0–590.1)                      524.8 (499.2–551.7)                      555.9 (528.8–584.4)                      571.5 (543.6–600.7)

| Both sexes combined (3–C) |                    |                     |                     |                     |
|---------------------------|--------------------|---------------------|---------------------|---------------------|
| 20–49                     |                    |                     |                     |                     |
| Year                      | Reference          | Scenario 1          | Scenario 2          | Scenario 3          |
| 2017                      | 100.2 (98.3–102.1) | 104.0 (102.0–106.0) | 104.0 (102.0–106.0) | 104.0 (102.0–106.0) |
| 2018                      | 95.2 (91.4–99.2)   | 97.5 (93.6–101.6)   | 100.0 (96.0–104.2)  | 100.9 (96.9–105.1)  |
| 2019                      | 92.1 (88.3–96.1)   | 93.0 (89.1–97.0)    | 97.8 (93.8–102.0)   | 99.6 (95.5–103.9)   |
| 2020                      | 89.5 (85.7–93.5)   | 89.1 (85.4–93.1)    | 96.2 (92.1–100.4)   | 98.8 (94.6–103.1)   |
| 2021                      | 85.9 (82.2–89.7)   | 84.3 (80.7–88.1)    | 93.3 (89.3–97.5)    | 96.7 (92.5–101.0)   |
| 2022                      | 85.0 (81.3–88.9)   | 82.3 (78.7–86.1)    | 93.4 (89.3–97.7)    | 97.7 (93.4–102.2)   |
| 2023                      | 78.2 (74.7–81.7)   | 74.6 (71.4–78.0)    | 86.9 (83.1–90.8)    | 91.6 (87.6–95.8)    |
| 2024                      | 79.8 (75.9–83.8)   | 75.8 (72.1–79.6)    | 89.6 (85.3–94.2)    | 95.4 (90.9–100.2)   |
| 2025                      | 74.6 (71.0–78.4)   | 70.5 (67.1–74.1)    | 84.8 (80.7–89.1)    | 91.1 (86.7–95.7)    |
| 2026                      | 72.1 (68.6–75.8)   | 67.8 (64.5–71.2)    | 82.9 (78.9–87.1)    | 89.8 (85.5–94.4)    |
| 2027                      | 71.3 (67.4–75.4)   | 66.7 (63.0–70.5)    | 82.9 (78.3–87.7)    | 90.6 (85.7–95.9)    |
| 2028                      | 67.6 (63.9–71.5)   | 62.9 (59.4–66.5)    | 79.4 (75.1–84.1)    | 87.6 (82.8–92.7)    |
| 2029                      | 64.2 (60.6–67.9)   | 59.4 (56.1–62.8)    | 76.3 (72.1–80.7)    | 84.9 (80.2–89.9)    |

|      |                  |                  |                  |                  |
|------|------------------|------------------|------------------|------------------|
| 2030 | 64.2 (60.6–67.9) | 59.1 (55.8–62.5) | 77.2 (72.9–81.7) | 86.7 (81.9–91.7) |
| 2031 | 60.2 (56.7–63.8) | 55.1 (52.0–58.4) | 73.2 (69.0–77.6) | 82.9 (78.2–87.9) |
| 2032 | 60.5 (57.0–64.1) | 55.1 (51.9–58.4) | 74.3 (70.1–78.8) | 85.0 (80.1–90.1) |
| 2033 | 56.5 (53.0–60.3) | 51.2 (48.0–54.7) | 70.3 (65.8–75.0) | 81.1 (76.0–86.5) |
| 2034 | 55.1 (51.6–58.9) | 49.7 (46.5–53.1) | 69.3 (64.9–74.1) | 80.7 (75.5–86.2) |
| 2035 | 53.1 (49.7–56.8) | 47.6 (44.6–50.9) | 67.5 (63.2–72.2) | 79.3 (74.2–84.8) |
| 2036 | 50.5 (47.2–54.0) | 45.0 (42.1–48.2) | 64.9 (60.7–69.4) | 76.9 (71.9–82.3) |
| 2037 | 49.8 (46.5–53.3) | 44.2 (41.3–47.3) | 64.8 (60.5–69.3) | 77.4 (72.4–82.9) |
| 2038 | 49.2 (46.0–52.6) | 43.4 (40.6–46.5) | 64.7 (60.5–69.2) | 78.0 (72.9–83.5) |
| 2039 | 45.5 (42.5–48.7) | 40.0 (37.4–42.8) | 60.5 (56.6–64.8) | 73.7 (68.9–78.8) |
| 2040 | 45.5 (42.5–48.8) | 39.8 (37.1–42.6) | 61.2 (57.2–65.6) | 75.2 (70.2–80.5) |

---

50–69

| Year | Reference           | Scenario 1          | Scenario 2          | Scenario 3          |
|------|---------------------|---------------------|---------------------|---------------------|
| 2017 | 957.6 (936.6–979.0) | 970.5 (949.3–992.3) | 970.5 (949.3–992.3) | 970.5 (949.3–992.3) |
| 2018 | 909.9 (877.4–943.7) | 905.3 (872.9–938.8) | 922.4 (889.4–956.6) | 928.5 (895.3–962.9) |
| 2019 | 892.4 (861.2–924.8) | 871.5 (841.0–903.1) | 904.8 (873.1–937.5) | 916.8 (884.7–950.0) |
| 2020 | 843.8 (814.5–874.0) | 808.8 (780.7–837.8) | 855.5 (825.9–886.2) | 872.7 (842.4–904.0) |



|      |                     |                     |                     |                     |
|------|---------------------|---------------------|---------------------|---------------------|
| 2021 | 796.3 (768.6–825.1) | 749.2 (723.1–776.3) | 807.5 (779.4–836.7) | 829.2 (800.2–859.1) |
| 2022 | 827.8 (790.7–866.7) | 764.5 (730.2–800.4) | 839.6 (801.9–879.0) | 867.8 (828.9–908.5) |
| 2023 | 807.4 (769.0–847.7) | 731.9 (697.1–768.4) | 818.9 (780.0–859.8) | 852.1 (811.6–894.6) |
| 2024 | 783.1 (743.5–824.7) | 706.4 (670.7–744.0) | 794.4 (754.2–836.6) | 832.0 (789.9–876.3) |
| 2025 | 767.2 (728.8–807.6) | 688.7 (654.2–725.0) | 778.3 (739.4–819.3) | 820.6 (779.5–863.8) |
| 2026 | 718.1 (682.2–755.9) | 641.6 (609.5–675.4) | 728.7 (692.2–767.0) | 773.3 (734.7–814.1) |
| 2027 | 718.3 (679.5–759.3) | 638.6 (604.1–675.1) | 728.9 (689.5–770.5) | 778.7 (736.6–823.2) |
| 2028 | 704.0 (666.1–744.0) | 622.9 (589.4–658.3) | 714.5 (676.0–755.1) | 768.4 (727.0–812.1) |
| 2029 | 670.0 (632.2–710.1) | 590.0 (556.7–625.3) | 680.1 (641.7–720.8) | 736.3 (694.7–780.4) |
| 2030 | 678.4 (639.6–719.5) | 594.5 (560.5–630.5) | 688.6 (649.3–730.4) | 750.5 (707.6–795.9) |
| 2031 | 655.9 (618.2–696.0) | 572.0 (539.1–607.0) | 666.0 (627.6–706.7) | 730.6 (688.5–775.2) |
| 2032 | 639.5 (602.7–678.6) | 555.0 (523.1–588.9) | 649.4 (612.0–689.0) | 717.1 (675.8–760.9) |
| 2033 | 625.6 (589.6–663.9) | 540.4 (509.2–573.4) | 635.3 (598.7–674.2) | 706.2 (665.5–749.5) |
| 2034 | 582.8 (548.9–618.8) | 501.0 (471.8–531.9) | 592.0 (557.5–628.5) | 662.4 (623.9–703.3) |
| 2035 | 582.3 (547.2–619.7) | 498.1 (468.1–530.1) | 591.5 (555.9–629.5) | 666.3 (626.1–709.1) |
| 2036 | 582.2 (547.1–619.4) | 495.6 (465.7–527.3) | 591.4 (555.8–629.3) | 670.6 (630.2–713.5) |
| 2037 | 564.2 (529.1–601.6) | 478.0 (448.2–509.6) | 573.2 (537.6–611.2) | 654.3 (613.6–697.6) |
| 2038 | 559.9 (525.1–596.9) | 472.0 (442.7–503.2) | 568.9 (533.6–606.5) | 653.7 (613.1–696.9) |
| 2039 | 526.4 (493.5–561.5) | 441.7 (414.1–471.1) | 535.0 (501.6–570.6) | 618.7 (580.1–660.0) |

|      |                     |                     |                     |                     |
|------|---------------------|---------------------|---------------------|---------------------|
| 2040 | 509.4 (477.1–543.8) | 425.3 (398.3–454.1) | 517.7 (484.9–552.8) | 602.8 (564.5–643.5) |
|------|---------------------|---------------------|---------------------|---------------------|

| ≥70  |                        |                        |                        |                        |
|------|------------------------|------------------------|------------------------|------------------------|
| Year | Reference              | Scenario 1             | Scenario 2             | Scenario 3             |
| 2017 | 1917.9 (1868.2–1969.1) | 1923.3 (1873.4–1974.6) | 1923.3 (1873.4–1974.6) | 1923.3 (1873.4–1974.6) |
| 2018 | 1871.2 (1814.5–1929.6) | 1856.8 (1800.6–1914.8) | 1873.2 (1816.4–1931.7) | 1879.0 (1822.1–1937.7) |
| 2019 | 1805.7 (1740.5–1873.3) | 1773.1 (1709.1–1839.6) | 1804.6 (1739.4–1872.2) | 1815.8 (1750.2–1883.8) |
| 2020 | 1764.3 (1698.3–1832.8) | 1714.4 (1650.3–1781.0) | 1760.2 (1694.4–1828.6) | 1776.6 (1710.2–1845.7) |
| 2021 | 1708.5 (1637.2–1783.1) | 1642.9 (1574.3–1714.6) | 1701.7 (1630.6–1775.9) | 1722.9 (1650.9–1798.0) |
| 2022 | 1662.4 (1590.5–1737.6) | 1581.9 (1513.4–1653.4) | 1652.9 (1581.4–1727.6) | 1678.7 (1606.1–1754.6) |
| 2023 | 1668.8 (1596.0–1745.0) | 1571.4 (1502.9–1643.1) | 1656.5 (1584.2–1732.0) | 1687.6 (1613.9–1764.6) |
| 2024 | 1638.2 (1566.3–1713.4) | 1535.1 (1467.8–1605.6) | 1623.2 (1552.0–1697.8) | 1658.9 (1586.1–1735.0) |
| 2025 | 1589.6 (1516.3–1666.5) | 1482.5 (1414.2–1554.2) | 1572.5 (1500.0–1648.5) | 1612.0 (1537.6–1689.9) |
| 2026 | 1580.6 (1506.4–1658.4) | 1467.0 (1398.2–1539.3) | 1560.9 (1487.6–1637.7) | 1605.0 (1529.7–1684.1) |
| 2027 | 1560.8 (1485.8–1639.5) | 1441.7 (1372.5–1514.4) | 1538.6 (1464.8–1616.3) | 1587.1 (1510.9–1667.2) |
| 2028 | 1506.3 (1434.0–1582.3) | 1384.8 (1318.3–1454.6) | 1482.5 (1411.3–1557.2) | 1533.9 (1460.2–1611.3) |
| 2029 | 1480.5 (1409.3–1555.4) | 1354.5 (1289.4–1423.0) | 1454.6 (1384.6–1528.1) | 1509.7 (1437.1–1586.0) |
| 2030 | 1445.4 (1375.8–1518.5) | 1316.1 (1252.7–1382.6) | 1417.7 (1349.4–1489.4) | 1476.0 (1404.9–1550.6) |

|      |                        |                        |                        |                        |
|------|------------------------|------------------------|------------------------|------------------------|
| 2031 | 1393.6 (1326.2–1464.3) | 1262.8 (1201.8–1326.9) | 1364.5 (1298.5–1433.7) | 1425.0 (1356.2–1497.4) |
| 2032 | 1381.2 (1314.5–1451.2) | 1245.6 (1185.5–1308.7) | 1350.0 (1284.9–1418.5) | 1414.3 (1346.1–1486.0) |
| 2033 | 1382.8 (1315.2–1453.9) | 1241.1 (1180.4–1304.9) | 1349.3 (1283.4–1418.7) | 1418.0 (1348.6–1490.9) |
| 2034 | 1347.6 (1281.3–1417.3) | 1203.7 (1144.5–1265.9) | 1312.7 (1248.2–1380.6) | 1383.8 (1315.8–1455.4) |
| 2035 | 1323.5 (1256.1–1394.5) | 1176.5 (1116.6–1239.6) | 1287.1 (1221.5–1356.1) | 1360.9 (1291.6–1434.0) |
| 2036 | 1303.6 (1237.3–1373.4) | 1153.3 (1094.6–1215.0) | 1265.6 (1201.2–1333.3) | 1342.4 (1274.1–1414.2) |
| 2037 | 1255.9 (1191.9–1323.3) | 1105.7 (1049.4–1165.1) | 1217.2 (1155.1–1282.5) | 1295.0 (1229.0–1364.6) |
| 2038 | 1222.6 (1160.2–1288.3) | 1071.2 (1016.6–1128.8) | 1182.8 (1122.5–1246.4) | 1262.4 (1198.0–1330.3) |
| 2039 | 1213.3 (1150.5–1279.5) | 1058.0 (1003.2–1115.8) | 1171.9 (1111.2–1235.8) | 1254.6 (1189.6–1323.1) |
| 2040 | 1182.3 (1120.8–1247.1) | 1026.1 (972.7–1082.3)  | 1140.0 (1080.7–1202.5) | 1224.3 (1160.6–1291.4) |

---

All age (3–D)

---

Men

---

| Year | Reference           | Scenario 1          | Scenario 2          | Scenario 3          |
|------|---------------------|---------------------|---------------------|---------------------|
| 2017 | 925.9 (898.9–953.6) | 934.0 (906.8–962.0) | 934.0 (906.8–962.0) | 934.0 (906.8–962.0) |
| 2018 | 925.4 (892.5–959.4) | 924.5 (891.7–958.5) | 934.1 (900.9–968.5) | 937.5 (904.2–972.0) |
| 2019 | 923.4 (888.0–960.2) | 913.1 (878.1–949.5) | 932.1 (896.4–969.3) | 939.0 (903.0–976.4) |
| 2020 | 920.3 (883.8–958.2) | 900.8 (865.1–937.9) | 929.1 (892.3–967.4) | 939.3 (902.1–978.0) |

|      |                     |                     |                     |                     |
|------|---------------------|---------------------|---------------------|---------------------|
| 2021 | 916.3 (879.4–954.7) | 887.7 (852.0–924.9) | 925.1 (887.9–963.9) | 938.7 (900.9–978.1) |
| 2022 | 911.7 (874.7–950.3) | 874.3 (838.8–911.3) | 920.6 (883.2–959.5) | 937.5 (899.5–977.1) |
| 2023 | 906.8 (869.8–945.2) | 860.7 (825.6–897.2) | 915.6 (878.3–954.5) | 935.8 (897.7–975.6) |
| 2024 | 901.5 (864.7–939.9) | 854.4 (819.5–890.7) | 910.4 (873.2–949.1) | 933.9 (895.8–973.6) |
| 2025 | 896.1 (859.5–934.2) | 847.9 (813.3–884.0) | 905.0 (868.0–943.5) | 931.7 (893.7–971.4) |
| 2026 | 890.6 (854.2–928.5) | 841.4 (807.0–877.2) | 899.5 (862.7–937.8) | 929.4 (891.4–969.0) |
| 2027 | 885.0 (848.8–922.7) | 834.8 (800.7–870.4) | 893.9 (857.3–931.9) | 927.0 (889.1–966.5) |
| 2028 | 879.3 (843.4–916.8) | 828.2 (794.4–863.5) | 888.2 (851.9–926.1) | 924.5 (886.7–963.9) |
| 2029 | 873.7 (837.9–910.9) | 821.7 (788.1–856.7) | 882.6 (846.5–920.2) | 922.0 (884.3–961.3) |
| 2030 | 868.0 (832.5–905.0) | 815.1 (781.8–849.8) | 876.9 (841.1–914.3) | 919.4 (881.8–958.6) |
| 2031 | 862.4 (827.1–899.1) | 808.5 (775.5–843.0) | 871.3 (835.7–908.4) | 916.8 (879.4–955.9) |
| 2032 | 856.7 (821.7–893.2) | 802.0 (769.3–836.2) | 865.7 (830.3–902.5) | 914.2 (876.9–953.2) |
| 2033 | 851.1 (816.3–887.4) | 795.6 (763.1–829.5) | 860.1 (824.9–896.7) | 911.7 (874.4–950.5) |
| 2034 | 845.6 (811.0–881.6) | 789.2 (756.9–822.8) | 854.5 (819.6–890.9) | 909.0 (871.9–947.8) |
| 2035 | 840.0 (805.7–875.8) | 782.8 (750.8–816.1) | 848.9 (814.2–885.1) | 906.4 (869.4–945.1) |
| 2036 | 834.5 (800.4–870.1) | 776.5 (744.7–809.6) | 843.4 (809.0–879.4) | 903.9 (866.9–942.4) |
| 2037 | 829.0 (795.1–864.4) | 770.2 (738.7–803.0) | 838.0 (803.7–873.7) | 901.3 (864.4–939.7) |
| 2038 | 823.6 (789.9–858.7) | 764.0 (732.7–796.5) | 832.5 (798.5–868.0) | 898.7 (861.9–937.0) |
| 2039 | 818.2 (784.7–853.1) | 757.8 (726.8–790.1) | 827.1 (793.3–862.4) | 896.1 (859.5–934.3) |

|      |                     |                     |                     |                     |
|------|---------------------|---------------------|---------------------|---------------------|
| 2040 | 812.8 (779.6–847.5) | 751.6 (720.9–783.7) | 821.7 (788.1–856.7) | 893.5 (857.0–931.6) |
|------|---------------------|---------------------|---------------------|---------------------|

| Women |                     |                     |                     |                     |
|-------|---------------------|---------------------|---------------------|---------------------|
| Year  | Reference           | Scenario 1          | Scenario 2          | Scenario 3          |
| 2017  | 394.2 (389.2–399.3) | 397.2 (392.2–402.4) | 397.2 (392.2–402.4) | 397.2 (392.2–402.4) |
| 2018  | 378.4 (373.6–383.2) | 379.9 (375.1–384.7) | 382.0 (377.2–386.8) | 382.7 (377.9–387.6) |
| 2019  | 368.8 (363.1–374.6) | 369.0 (363.3–374.8) | 373.0 (367.3–378.9) | 374.5 (368.7–380.4) |
| 2020  | 370.9 (365.5–376.4) | 369.7 (364.4–375.2) | 375.9 (370.4–381.4) | 378.1 (372.6–383.6) |
| 2021  | 354.3 (349.1–359.6) | 351.9 (346.8–357.2) | 359.8 (354.5–365.1) | 362.6 (357.2–368.0) |
| 2022  | 349.8 (344.6–355.0) | 346.2 (341.1–351.3) | 355.8 (350.6–361.1) | 359.3 (354.0–364.6) |
| 2023  | 359.3 (352.7–366.1) | 354.3 (347.8–361.0) | 366.2 (359.5–373.1) | 370.5 (363.7–377.4) |
| 2024  | 347.4 (341.2–353.7) | 341.6 (335.5–347.8) | 354.7 (348.4–361.2) | 359.5 (353.1–366.1) |
| 2025  | 337.8 (331.1–344.7) | 331.2 (324.7–337.9) | 345.6 (338.7–352.6) | 351.0 (344.0–358.1) |
| 2026  | 339.3 (332.8–346.0) | 331.8 (325.4–338.3) | 347.8 (341.1–354.6) | 353.9 (347.1–360.9) |
| 2027  | 325.7 (319.4–332.1) | 317.6 (311.4–323.8) | 334.4 (328.0–341.0) | 341.0 (334.4–347.7) |
| 2028  | 319.5 (313.3–325.8) | 310.6 (304.6–316.8) | 328.6 (322.3–335.1) | 335.7 (329.2–342.4) |
| 2029  | 327.3 (320.2–334.6) | 317.4 (310.4–324.5) | 337.4 (330.0–344.9) | 345.3 (337.8–353.0) |
| 2030  | 318.7 (311.9–325.7) | 308.2 (301.6–314.9) | 329.1 (322.1–336.4) | 337.5 (330.3–344.9) |

|      |                     |                     |                     |                     |
|------|---------------------|---------------------|---------------------|---------------------|
| 2031 | 309.5 (302.4–316.7) | 298.4 (291.6–305.3) | 320.2 (312.9–327.6) | 329.0 (321.5–336.6) |
| 2032 | 310.4 (303.4–317.5) | 298.5 (291.7–305.3) | 321.7 (314.5–329.1) | 331.2 (323.8–338.9) |
| 2033 | 299.3 (292.6–306.2) | 287.0 (280.5–293.6) | 310.8 (303.8–317.9) | 320.6 (313.4–328.0) |
| 2034 | 292.1 (285.5–298.8) | 279.3 (273.0–285.7) | 303.9 (297.0–310.9) | 314.1 (307.0–321.3) |
| 2035 | 298.2 (291.0–305.6) | 284.3 (277.4–291.4) | 310.8 (303.3–318.5) | 321.9 (314.1–329.9) |
| 2036 | 292.2 (285.1–299.4) | 277.8 (271.1–284.7) | 305.1 (297.8–312.7) | 316.6 (309.0–324.4) |
| 2037 | 283.5 (276.5–290.8) | 268.8 (262.1–275.7) | 296.7 (289.3–304.2) | 308.4 (300.7–316.3) |
| 2038 | 283.9 (276.9–291.1) | 268.4 (261.8–275.2) | 297.6 (290.2–305.2) | 310.0 (302.3–317.9) |
| 2039 | 274.9 (268.1–281.9) | 259.2 (252.8–265.8) | 288.7 (281.6–296.1) | 301.3 (293.9–309.0) |
| 2040 | 267.3 (260.6–274.1) | 251.3 (245.0–257.7) | 281.2 (274.2–288.4) | 294.1 (286.7–301.5) |

---

Both sexes combined

| Year | Reference           | Scenario 1          | Scenario 2          | Scenario 3          |
|------|---------------------|---------------------|---------------------|---------------------|
| 2017 | 656.5 (643.9–669.4) | 660.5 (647.8–673.5) | 660.5 (647.8–673.5) | 660.5 (647.8–673.5) |
| 2018 | 637.6 (627.1–648.2) | 638.0 (627.6–648.7) | 642.0 (631.5–652.7) | 643.5 (632.9–654.2) |
| 2019 | 629.9 (619.8–640.3) | 627.0 (616.9–637.3) | 634.9 (624.6–645.3) | 637.7 (627.4–648.2) |
| 2020 | 636.0 (625.6–646.6) | 629.6 (619.3–640.1) | 641.6 (631.1–652.3) | 645.8 (635.3–656.6) |
| 2021 | 620.7 (608.0–633.7) | 611.2 (598.7–624.0) | 626.7 (613.9–639.8) | 632.3 (619.3–645.5) |

|      |                     |                     |                     |                     |
|------|---------------------|---------------------|---------------------|---------------------|
| 2022 | 617.6 (605.2–630.3) | 604.8 (592.7–617.3) | 624.1 (611.5–636.9) | 631.0 (618.3–644.0) |
| 2023 | 617.5 (605.2–630.1) | 601.5 (589.5–613.8) | 624.5 (612.1–637.3) | 632.9 (620.2–645.8) |
| 2024 | 603.8 (591.6–616.3) | 587.3 (575.4–599.4) | 611.2 (598.9–623.8) | 620.7 (608.2–633.5) |
| 2025 | 583.6 (569.4–598.1) | 566.7 (552.9–580.8) | 591.2 (576.9–605.9) | 601.8 (587.2–616.7) |
| 2026 | 583.1 (570.8–595.7) | 565.3 (553.4–577.5) | 591.2 (578.8–604.0) | 603.1 (590.4–616.1) |
| 2027 | 573.0 (560.9–585.4) | 554.7 (543.0–566.7) | 581.5 (569.2–594.1) | 594.5 (581.9–607.3) |
| 2028 | 561.1 (549.2–573.3) | 542.3 (530.8–554.1) | 569.9 (557.8–582.3) | 584.0 (571.6–596.6) |
| 2029 | 569.0 (555.0–583.3) | 549.1 (535.5–562.9) | 578.4 (564.2–593.0) | 593.9 (579.3–608.9) |
| 2030 | 558.4 (544.5–572.8) | 538.0 (524.6–551.9) | 568.2 (554.0–582.8) | 584.7 (570.1–599.7) |
| 2031 | 547.6 (534.1–561.5) | 526.8 (513.8–540.1) | 557.7 (543.9–571.8) | 575.2 (561.0–589.7) |
| 2032 | 548.9 (535.0–563.1) | 527.2 (513.9–540.8) | 559.4 (545.3–573.9) | 578.3 (563.7–593.2) |
| 2033 | 545.3 (530.9–560.1) | 522.9 (509.2–537.1) | 556.3 (541.6–571.3) | 576.3 (561.1–591.9) |
| 2034 | 535.0 (521.1–549.3) | 512.3 (499.0–526.0) | 546.2 (532.0–560.8) | 567.1 (552.4–582.3) |
| 2035 | 533.8 (519.9–548.1) | 510.3 (497.0–524.0) | 545.4 (531.2–560.1) | 567.6 (552.7–582.8) |
| 2036 | 527.0 (513.1–541.2) | 503.0 (489.7–516.6) | 538.9 (524.7–553.5) | 562.0 (547.2–577.2) |
| 2037 | 507.4 (493.2–522.0) | 483.6 (470.0–497.5) | 519.3 (504.8–534.3) | 542.8 (527.6–558.4) |
| 2038 | 505.6 (491.8–519.8) | 481.1 (467.9–494.6) | 517.9 (503.8–532.5) | 542.5 (527.7–557.8) |
| 2039 | 501.5 (487.8–515.5) | 476.4 (463.4–489.8) | 514.2 (500.1–528.6) | 539.8 (525.0–554.9) |

|      |                     |                     |                     |                     |
|------|---------------------|---------------------|---------------------|---------------------|
| 2040 | 491.2 (477.7–505.1) | 465.9 (453.1–479.1) | 504.1 (490.2–518.4) | 530.3 (515.7–545.4) |
|------|---------------------|---------------------|---------------------|---------------------|

---

65 1: best scenario; 2: moderate scenario; 3: worse scenario
